# Supplementary material for: Comparative Transcriptomic Analysis of Inarching Invigorating Rootstock onto Incompatible Grafts in Citrus
Source: MDPI journal article supplement (doi:10.3390/ijms232314523), 2022-11-22
Supplement: s1 [file s1]

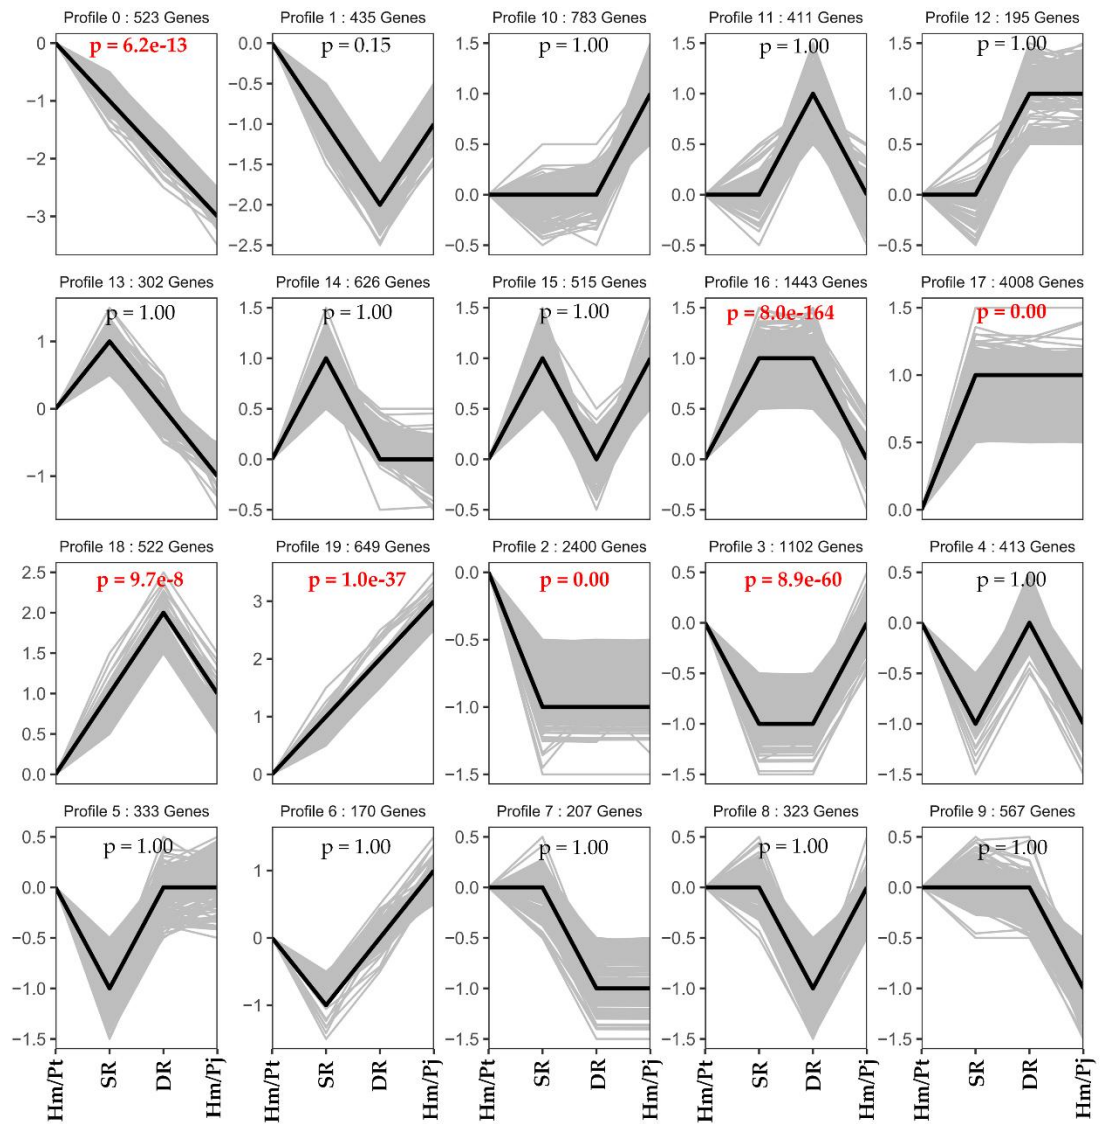

**Figure S1. Graft-induced transcripts grouped according to temporal expression profiles.** Each of the profiles is represented as a different plot.

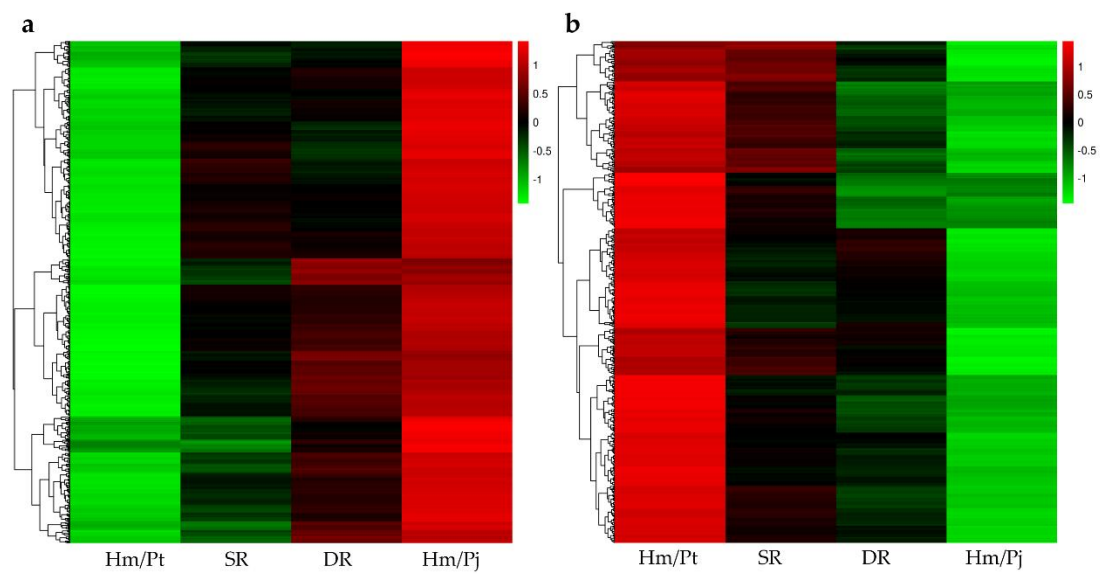

**Figure S2. Heatmap of genes in upregulated and downregulated expression profiles.** Heatmap color indicates  $\log_{10}(\text{FPKM}+0.01)$  value. **a** Heatmap of genes in profile 19, **b** Heatmap of genes in profile 0.

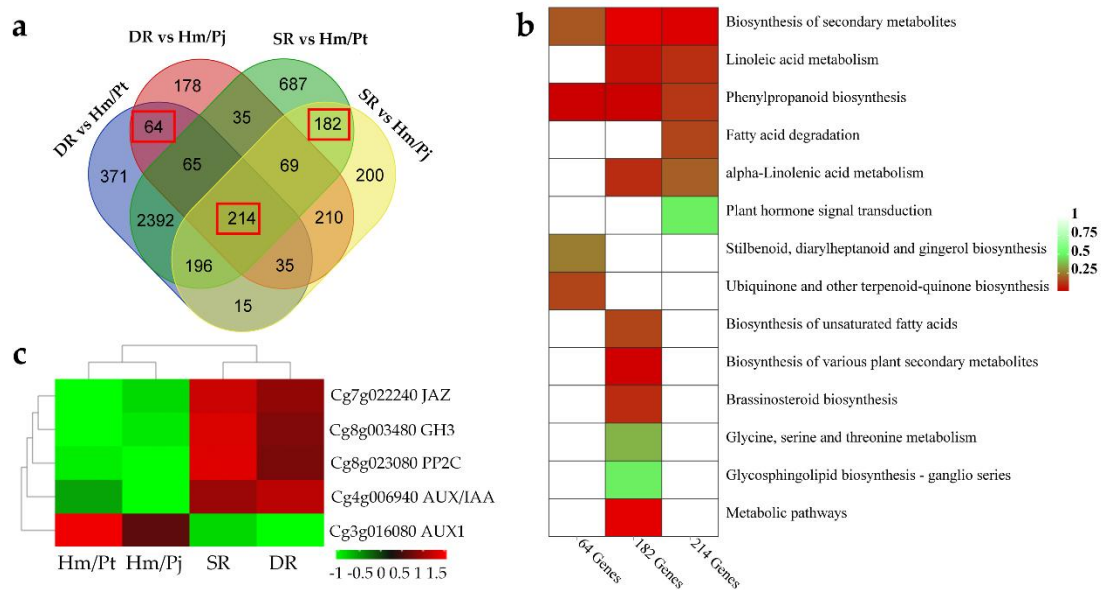

**Figure S3. DEG analysis between different graft combinations.** **a** Venn diagram of DEGs in each graft combinations. **b** KEGG pathways for different compare groups. **c** heatmap of DEGs between DR and SR vs Hm/Pt and Hm/Pj.

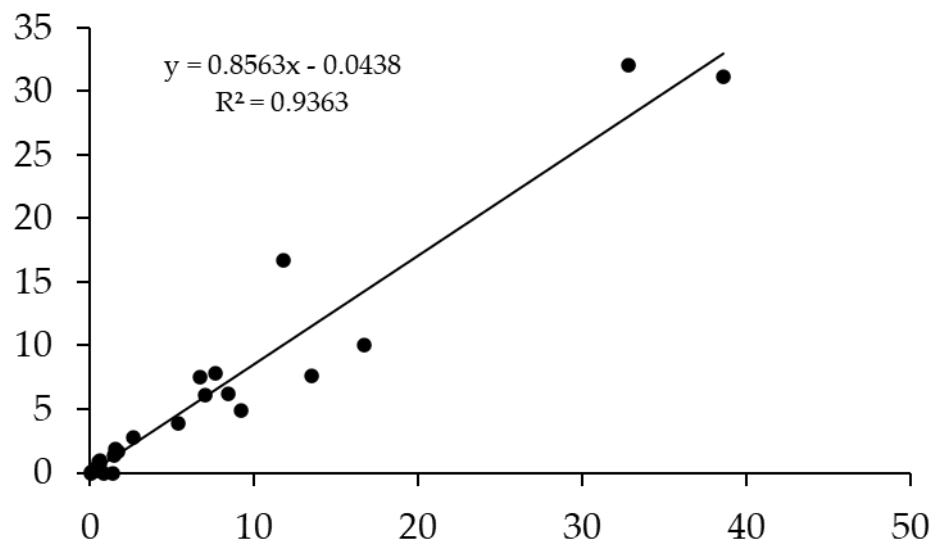

Figure S4. Pearson's correlation of RNA-seq and qRT-PCR results.

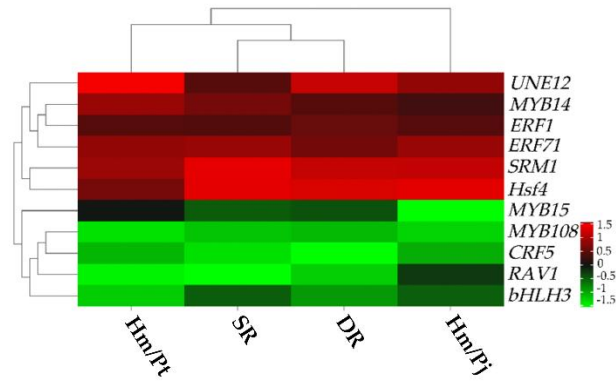

**Figure S5. The expression of important graft compatibility related transcription factors.**

Heatmap color indicates  $\log_{10}(\text{FPKM}+0.01)$  value.
