# Supplementary material for: Comparative Transcriptomic Analysis of Inarching Invigorating Rootstock onto Incompatible Grafts in Citrus
Source: Int J Mol Sci. 2022 Nov 22;23(23):14523. doi: 10.3390/ijms232314523 (PMC9735857; doi:10.3390/ijms232314523)
Supplement: Supplementary file 1 [file ijms-23-14523-s001.zip › Supplementary Tables.xlsx]

## Sheet: Table S1
Table S1. Overview of RNA-seq data
Sample ID	Clean reads	Error rate(%)	Q20(%)	Q30(%)	GC content(%)	Alignment rate(%)
Hm/Pt_1	29641044	0.02	96.83	92.47	44.34	91
Hm/Pt_2	31716128	0.02	96.71	92.23	44.42	91.26
Hm/Pt_3	20871979	0.01	97.9	94.37	45.24	92.14
SR_1	15078528	0.03	97.95	93.75	43.87	95.92
SR_2	24572207	0.04	97.5	92.37	43.72	95.76
SR_3	49181927	0.04	97.39	92.08	43.71	96.65
DR_1	36140394	0.03	97.54	93.02	43.88	95.16
DR_2	27687528	0.03	97.94	93.86	43.73	95.18
DR_3	37331480	0.04	97.86	93.31	43.52	96.65
Hm/Pj_1	43814130	0.04	97.66	92.8	43.65	95.79
Hm/Pj_2	30518521	0.04	97.48	92.33	43.99	96.82
Hm/Pj_3	37111674	0.04	97.58	92.62	43.7	96.61
Note: Hm/Pt: Citrus maxima (Burm.) Merrill cv. Hongmian miyou (abbreviated Hm) grafted onto Poncirus trifoliata (abbreviated Pt). Hm/Pj: ‘Hongmian miyou’ grafted onto Citrus junos Sieb ex Tanaka cv. Pujiang Xiangcheng (abbreviated Pj), a novel citrus rootstock cultivar recently selected from wild populations in Sichuan province, China. Hm/(Pt+Pj): Hm/Pt plant inarching with Pj, to form single- ro…

## Sheet: Table S2
Table S2. Primer sequences used in qRT-PCR experiments.
Unigene	Sequence
Cg1g010830	F: CTTCTCAATTCTTATTCCAA
	R: AATCCGATTCATTACCTT
Cg9g020350	F: ATCTACTGCCGACACTCT
	R: ACCTGCTTGTTGCTACTT
Cg5g004810	F: ATTCCTTCTCACCACTTC
	R: ATTGCTCGTTCCTTCATT
Cg7g011250	F: CCTCTACCACTAACTCAA
	R: GATACCTATACTCGCCATA
Cg4g015550	F: CTTGGATGAGGTAATGGA
	R: TCTTCTGAACTTGCGATA
Cg6g007010	F: CTTATTCTCCTGTATCAC
	R: GTATCATCTTCAACTCTAA
Cg2g035410	F: AGGAGTATTAACAATGAG
	R: CAGTAGGATGATTAGTAG
Cg2g015060	F: AGGAAGAACAGACAATGAA
	R: CGGCTAATGGTGTATGAT
Cg1g010820	F: AATTGAACAACAACTCTC
	R: ACTGATGAATAAGGACAA
Cg2g044950	F: CTGCTTCTACTACATCAC
	R: TTCTTCTTCAAGGCTATG
Cg5g016320	F: ATGAGGATGATGGCTACA
	R: CCAGAGTCATTGCGTTAA
Cg6g009750	F: TAAATCCACCGAAATCATCTCTAT
	R: ATGTTGGCTGTTGCTGTT
Cg8g023080	F: TTGTGGAAGAAGAAGAGAC
	R: AATTCATCAGCAGCAGTT
β-Tubulin	F: ACATCCCGCCTAAGGGTCTG
	R: TTCCTCCGAAACATAGCCGTA

## Sheet: Table S3
Table S3 Plant hormone signal transduction genes in profile 2
Gene	FPKM Value				Description
	Hm/Pt	SR	DR	Hm/Pj
Cg1g011990	5.65366	1.3015	1.80136	1.95898	serine/threonine-protein kinase BRI1-like 2
CgUng000770	36.7924	19.6533	20.8586	16.5101	transcription factor MYC2-like
Cg1g003440	15.5593	0.053188	0.348446	0.363373	STS14 protein
Cg7g000970	67.6227	28.3491	30.7551	28.1925	coronatine-insensitive protein 1
Cg8g014090	0.88995	0.035906	0.208681	0.145821	hypothetical protein CISIN_1g045005mg
Cg8g017500	35.8913	0.935108	1.43069	0.846841	catalytic, putative
Cg1g012560	2.49578	0.4245	0.277563	0.498704	auxin-responsive protein IAA27
Cg1g014320	42.7316	10.5771	11.5286	11.8423	auxin-responsive protein IAA27-like
Cg2g035770	1.42571	0	0	0	auxin-responsive protein IAA32
Cg9g006770	130.715	1.10512	2.04479	2.9339	auxin-responsive protein IAA14-like
Cg9g009660	5.17073	1.97985	2.60005	2.06146	auxin-responsive protein IAA13
Cg1g011180	4.3369	1.87915	1.86073	1.4363	protein TRANSPORT INHIBITOR RESPONSE 1
Cg2g041250	5.52197	0.216547	0.0909338	0.292982	protein TRANSPORT INHIBITOR RESPONSE 1
Cg2g042730	18.876	6.09804	5.35915	7.0467	auxin response factor 3 isoform X2
Cg4g017890	27.8125	12.5868	13.0105	12.5114	auxin response factor 19 isoform X1
Cg4g020590	53.4085	16.6102	19.1549	13.1012	auxin response factor 19-like
Cg2g017510	0.116882	0	0	0	indole-3-acetic acid-amido synthetase GH3.6
Cg3g006810	0.0282113	0	0	0	indole-3-acetic acid-amido synthetase GH3.17-like
Cg1g008870	0.116591	0	0	0	auxin-induced protein x15
Cg1g009140	11.5859	2.09526	2.70465	3.37466	auxin-induced protein 6B-like
Cg3g023800	0.0213662	0	0	0	auxin-induced protein 6B-like
Cg7g012500	0.0956393	0	0	0	auxin-responsive protein SAUR71-like
Cg8g000980	1.09035	0	0	0	auxin-responsive protein SAUR66
Cg8g000990	0.318884	0	0	0	auxin-responsive protein SAUR68-like
CgUng002620	0.450246	0.0861253	0.1447	0.0712128	auxin-responsive protein SAUR71
CgUng005220	3.80667	0.947797	1.26439	0.695872	auxin-responsive protein SAUR20
CgUng005390	8.02532	0.967725	1.55567	0.903399	auxin-induced protein 15A-like
CgUng005410	0.214431	0	0	0	auxin-responsive protein SAUR21-like
CgUng005420	0.125648	0	0	0	auxin-responsive protein SAUR23-like
CgUng005430	0.886418	0	0	0	auxin-responsive protein SAUR21-like
CgUng005460	23.9795	1.70284	1.48471	2.1253	auxin-responsive protein SAUR50-like
Cg7g017820	47.7135	5.68096	7.74029	15.8388	two-component response regulator ARR11 isoform X1
Cg7g020100	24.2376	9.91076	7.19007	6.54667	two-component response regulator ARR6
Cg4g007980	48.1924	15.8269	20.9685	9.54497	DELLA protein GAI
Cg3g020940	10.0641	0.950306	1.17376	0.847234	cyclin-D3-1
Cg9g016330	149.322	6.44296	9.60887	5.41942	protein STRICTOSIDINE SYNTHASE-LIKE 2
Cg9g017270	2.96302	0.326586	0.241741	0.576911	regulatory protein NPR5-like
Cg7g012190	31.8919	10.6512	18.9529	15.6492	transcription factor PIF4-like

## Sheet: Table S4
Table S4 Hormone-related DEGs between incompatible grafts and inarched plants
Gene	FPKM Value				Description
	Hm/Pt	SR	DR	Hm/Pj
Cg1g003440	15.5593	0.053188	0.348446	0.363373	PR1; pathogenesis-related protein 1
Cg8g001890	3.48089	0	0.0703715	0	AUX1, LAX; auxin influx carrier (AUX1 LAX family)
Cg6g016880	1.91859	0.228042	0.169693	0.597031	ABF; ABA responsive element binding factor
Cg8g017500	35.8913	0.935108	1.43069	0.846841	ABF; ABA responsive element binding factor
Cg9g018990	3.15746	52.1159	36.8685	34.6093	ABF; ABA responsive element binding factor
Cg1g012560	2.49578	0.4245	0.277563	0.498704	IAA; auxin-responsive protein IAA
Cg2g035770	1.42571	0	0	0	IAA; auxin-responsive protein IAA
Cg3g010270	4.088	0.061518	0.0270183	0.49446	IAA; auxin-responsive protein IAA
Cg9g006770	130.715	1.10512	2.04479	2.9339	IAA; auxin-responsive protein IAA
Cg2g041250	5.52197	0.216547	0.0909338	0.292982	TIR1; transport inhibitor response 1
Cg1g009140	11.5859	2.09526	2.70465	3.37466	SAUR; SAUR family protein
Cg8g000980	1.09035	0	0	0	SAUR; SAUR family protein
CgUng005390	8.02532	0.967725	1.55567	0.903399	SAUR; SAUR family protein
CgUng005460	23.9795	1.70284	1.48471	2.1253	SAUR; SAUR family protein
Cg7g017820	47.7135	5.68096	7.74029	15.8388	ARR-B; two-component response regulator ARR-B family
Cg4g015640	11.6093	54.0365	50.4398	87.2302	GID1; gibberellin receptor GID1 [EC:3.-.-.-]
Cg4g015650	3.86561	20.6899	24.1573	71.529	GID1; gibberellin receptor GID1 [EC:3.-.-.-]
Cg6g009750	40.0929	9.1996	7.42131	15.7258	PYL; abscisic acid receptor PYR/PYL family
Cg8g005340	28.915	125.542	121.113	139.691	SNRK2; serine/threonine-protein kinase SRK2 [EC:2.7.11.1]
Cg3g021510	50.9171	8.55078	7.02502	20.5333	BKI1; BRI1 kinase inhibitor 1
Cg6g005880	1.06195	26.6045	11.3667	31.9019	BSK; BR-signaling kinase [EC:2.7.11.1]
Cg3g020940	10.0641	0.950306	1.17376	0.847234	CYCD3; cyclin D3, plant
Cg7g012270	6.38402	52.6462	34.7043	21.6292	NPR1; regulatory protein NPR1
Cg7g012280	0.103275	2.20353	1.2621	0.918045	NPR1; regulatory protein NPR1
Cg9g016330	149.322	6.44296	9.60887	5.41942	NPR1; regulatory protein NPR1
Cg9g017270	2.96302	0.326586	0.241741	0.576911	NPR1; regulatory protein NPR1
Cg8g010420	4.56917	53.4636	90.6968	56.6249	ETR, ERS; ethylene receptor [EC:2.7.13.-]
Cg9g007590	2.1258	8.79507	10.4309	6.48592	ETR, ERS; ethylene receptor [EC:2.7.13.-]
Cg2g005620	33.6063	262.233	178.503	152.096	EIN3; ethylene-insensitive protein 3
Cg4g007230	3.25957	44.0092	28.373	13.2836	EBF1_2; EIN3-binding F-box protein
Cg9g007940	0.0153857	6.57401	6.33839	2.28229	ERF1; ethylene-responsive transcription factor 1

## Sheet: Table S5
Table S5 DEGs between DR and SR
Gene	FPKM Value				Description
	Hm/Pt	SR	DR	Hm/Pj
Cg1g000530	1.73898	44.314	9.68456	1.91187	glutamate receptor 3.6
Cg1g001610	0.0167656	0.0411773	0.344136	0.439603	protein NUCLEAR FUSION DEFECTIVE 4-like
Cg1g002050	1.27489	0.0396157	0.297539	0.150916	APC membrane recruitment protein 1
Cg1g005800	1.20393	0.199229	1.03119	0.729182	UPF0481 protein At3g47200
Cg1g009760	0.0908119	4.64333	0.797961	0.240099	beta-fructofuranosidase, insoluble isoenzyme CWINV1
Cg1g010830	1.56296	12.4311	3.0199	0.23337	protein TIFY 10A-like
Cg1g013780	1.60149	30.5999	7.28353	23.6037	suppressor protein SRP40-like
Cg1g023330	1.21348	1.82817	0.40549	2.98253	U-box domain-containing protein 26-like
Cg1g024440	0.0477141	0	0.700164	0.0334425	amino acid permease 4-like
Cg1g025720	0.0829289	1.47933	0.21348	0.0775251	G-type lectin S-receptor-like serine/threonine-protein kinase LECRK4
Cg1g026010	13.8716	9.66267	1.37418	3.34515	E3 ubiquitin-protein ligase ATL76
Cg1g026640	3.24988	0.99141	4.12682	7.74265	egg cell-secreted protein 1.4
Cg1g027210	0	0.17228	0.0061711	0.0379089	---NA---
Cg1g028930	0.383399	5.76009	0.647588	0.245514	L-ascorbate oxidase
Cg2g001040	0	0.484025	0.0571869	0.0139046	cytochrome P450 83B1
Cg2g002460	3.13858	0.402929	0.0282204	0.568789	flavonoid 3'-monooxygenase
Cg2g007960	0.0536393	0.37656	0.0641224	0.0831072	serine carboxypeptidase II-3-like
Cg2g009410	0.611417	7.27016	35.5603	9.76818	---NA---
Cg2g009590	0.973808	0.903229	6.27792	0.695829	Hypothetical predicted protein
Cg2g010320	715.577	2.95699	24.7595	3.02033	glycerophosphodiester phosphodiesterase GDPD1, chloroplastic-like
Cg2g014290	0.143065	5.26072	1.12264	0.728575	hypothetical protein CICLE_v10017094mg
Cg2g015060	0	0.85523	0.115945	0	transcription factor MYB15-like
Cg2g015360	1.06827	1.45684	10.0957	1.65364	protein TIC 20-IV, chloroplastic
Cg2g020430	0.345318	0.887107	0.0585624	0.0581695	nudix hydrolase 7-like
Cg2g021360	4.55004	114.027	21.6728	21.8372	NAC domain-containing protein 72-like
Cg2g025060	0.0156643	0.539564	0.0849054	0.0231462	receptor-like protein EIX2
Cg2g025670	0.595336	146.815	36.3286	41.1789	cytochrome P450 83B1
Cg2g031980	7.88414	0.135145	1.53794	0.706305	F-box protein PP2-B15-like
Cg2g032470	14.9229	1.87424	13.0117	19.2697	nicotianamine synthase-like
Cg2g035410	0.740353	0.25671	0.0218506	0.522878	trihelix transcription factor PTL-like
Cg2g036210	0.0796722	2.90377	0.640104	1.33467	VQ motif-containing protein 8, chloroplastic-like
Cg2g038020	0.0245393	0.0659319	0.624511	0.0248505	Leucine-rich repeat protein kinase family protein, putative
Cg2g040470	29.0729	0.667198	3.85297	8.53679	gibberellin 2-beta-dioxygenase 8
Cg2g041470	2.34163	0.387472	2.66942	0.812217	endonuclease 1
Cg2g042190	3.02871	5.80958	0.420216	0.014539	hypothetical protein CISIN_1g045136mg
Cg2g042720	0.153961	1.12044	0.214124	0.236175	MLO-like protein 12
Cg2g044440	53.5276	4.51288	19.7621	3.91857	chlorophyll a-b binding protein of LHCII type 1
Cg2g044450	0.330903	0.0854485	0.561311	0.143023	chlorophyll a-b binding protein of LHCII type 1
Cg2g044900	0.801986	2.17915	0.304356	0.201867	glucan endo-1,3-beta-glucosidase 14
Cg2g046280	0.545869	0.0554194	0.347057	0.328469	cytochrome P450 71D8
Cg2g046630	0.861249	0.459781	5.02199	0.0659781	protein ENDOSPERM DEFECTIVE 1
Cg2g047100	1752.14	4.75966	29.0707	13.4961	ferric reduction oxidase 7, chloroplastic-like
Cg3g008470	0.569544	5.80957	1.03204	5.53176	cytochrome P450 CYP82D47-like
Cg3g008890	0.0656851	0.229508	2.65735	0	hypothetical protein CISIN_1g0479051mg, partial
Cg3g009940	0.108441	0.0368315	0.301455	0.0187893	Anthranilate N-benzoyltransferase protein 1
Cg3g014390	0.0278948	0.227708	0.992134	0.234735	Transmembrane protein
Cg3g014400	0	0.229068	2.05951	0.471819	---NA---
Cg3g015880	0.191313	4.75653	0.66339	4.55978	probable 6-phosphogluconolactonase 2
Cg3g021660	1.27686	22.3782	4.08786	2.03892	patatin-like protein 2
Cg3g024450	0.721884	5.30667	1.18166	6.59138	protein FD
Cg4g000250	24.1837	2.09516	15.1974	7.67488	hypothetical protein CICLE_v10009046mg
Cg4g000870	0.0571992	1.7113	0.324696	0.439851	glutamate receptor 2.7 isoform X1
Cg4g001070	0.0210548	0.0132387	0.28496	0.0464987	peroxidase 46-like
Cg4g003730	0.831578	0.341097	1.67366	0.198955	G-type lectin S-receptor-like serine/threonine-protein kinase LECRK2
Cg4g003750	0	0.0608797	1.51437	0	tetraspanin-19-like isoform X2
Cg4g005000	77.1569	11.8004	53.2373	6.30424	protein NRT1/ PTR FAMILY 4.3
Cg4g006540	1.12285	0.270705	1.15981	0.370282	histone deacetylase 2
Cg4g006720	1368.09	554.074	115.946	320.079	seed lectin
Cg4g008520	0.170668	0.150293	0.611622	0.0974677	aldehyde dehydrogenase family 2 member C4-like
Cg4g008690	0.0635003	1.70117	0.345184	0.148447	IQ domain-containing protein IQM1
Cg4g014330	1.20465	0.340442	0.0164319	0.317715	cationic amino acid transporter 6, chloroplastic-like
Cg4g015390	0.0801837	0.0356261	0.241177	0.229752	protein NRT1/ PTR FAMILY 4.4
Cg4g015550	0.879524	2.16704	10.259	0.517612	transcription elongation factor SPT6 homolog
Cg4g017690	17.447	20.8155	4.75612	28.582	protein LAZ1 homolog 2
Cg4g019760	0.40111	18.1713	3.86099	3.41304	arogenate dehydrogenase 1, chloroplastic
Cg4g020580	0.211148	0.465911	0.0662061	0.0502753	cytochrome P450 CYP73A100-like
Cg4g021260	0.0597472	2.53074	0.537529	3.71138	hypothetical protein CICLE_v10009598mg
Cg4g024130	3.6677	0.389941	0.0566647	0.189068	serine carboxypeptidase 24
Cg5g001030	0.511804	1.15342	0.141068	3.82514	cellulose synthase-like protein G3
Cg5g002310	4.59489	5.6487	29.0692	3.26243	hypothetical protein CUMW_042270
Cg5g002320	2.09204	0.649163	2.89846	0.385647	Nuclear transport factor 2 family protein, putative
Cg5g002460	4.01766	4.2717	18.2634	0.755487	---NA---
Cg5g004110	0	5.89783	0.401041	0.0180096	---NA---
Cg5g004760	14.4412	0.045159	0.385322	0.105566	probable cyclic nucleotide-gated ion channel 16
Cg5g004810	0.654558	19.8719	4.70375	3.17761	transcription factor bHLH162-like
Cg5g009140	1.86317	0.251537	1.27981	0.458519	protein DETOXIFICATION 56
Cg5g009320	0.304419	5.03832	1.00893	0.582001	geraniol 8-hydroxylase-like
Cg5g010810	0.171741	0.281895	2.41806	0.292871	muscle M-line assembly protein unc-89 isoform X2
Cg5g011080	0.0371138	1.24951	0.123397	0.55498	UDP-glycosyltransferase 83A1-like
Cg5g013390	3.96611	0.565799	3.39515	1.80745	hypothetical protein CISIN_1g040544mg
Cg5g015870	0.289394	0.0506247	0.303946	0.645508	cytochrome P450 CYP72A219-like
Cg5g016930	0.439131	2.27075	0.488394	0.302144	---NA---
Cg5g017600	0.265561	0.137205	0.669876	0.817473	ent-copalyl diphosphate synthase, chloroplastic-like isoform X1
Cg5g020690	2436.46	630.347	151.327	7.62612	miraculin-like protein 2
Cg5g020750	46.8646	31.5017	4.41396	0.360586	miraculin-like protein 2
Cg5g020770	26.7982	28.8813	0.957413	0.0951631	miraculin-like protein 2
Cg5g020920	0.0295088	0.0758444	0.473879	0.674595	abietadienol/abietadienal oxidase
Cg5g023630	98.789	2.84508	11.8008	19.2847	licodione synthase-like
Cg5g026620	0.296273	8.75161	1.22412	0.163176	transmembrane protein
Cg5g030870	3.55572	0.199354	0.956216	2.68364	pyruvate kinase, cytosolic isozyme
Cg5g034970	0.024539	1.40027	0.343682	0.117592	chlorophyllase-1, chloroplastic
Cg5g036730	213.051	6.28343	26.7927	76.7429	monothiol glutaredoxin-S9
Cg5g036740	0.236408	1.29205	0.0465218	5.05418	glutaredoxin-C11
Cg5g038850	18.6837	4.37104	17.7861	0.426978	galactinol synthase 1
Cg5g039040	0	1.52144	0.128607	0.307181	Chaperone DnaK
Cg5g042440	6.41938	2.32879	12.2393	4.16844	(+)-neomenthol dehydrogenase-like
Cg5g042950	0.110771	0.356431	1.91883	0.0671899	probable fructokinase-7
Cg5g043100	0.324965	4.8276	0.843999	6.7392	2-methylene-furan-3-one reductase-like
Cg6g001550	0.466916	2.3051	0.281978	0.997464	leucine-rich repeat receptor-like protein kinase PXC2
Cg6g001580	0.42081	1.79846	0.2061	0.0350446	O-acyltransferase WSD1-like
Cg6g001740	1.89003	4.04069	0.593459	0.25592	phenylalanine ammonia-lyase
Cg6g002770	0.166559	0.384494	2.59655	0.125638	---NA---
Cg6g003640	0.944911	0.058779	0.493896	1.15232	probable membrane-associated kinase regulator 4
Cg6g006620	0.0750555	2.43534	0.446633	1.08635	lactosylceramide 4-alpha-galactosyltransferase-like
Cg6g007010	0.172792	0.135564	0.966441	0.212833	myb family transcription factor PHL7-like
Cg6g007730	99.993	4.60164	18.7492	9.69338	DNA-binding protein SMUBP-2
Cg6g011050	1.36228	0.342507	0.0785016	0.567984	bromodomain-containing protein DDB_G0270170
Cg6g014150	0.0521431	0.432353	0.0183841	0.0277239	probable xyloglucan galactosyltransferase GT14
Cg6g015620	0.0258055	0.482038	0.0489142	0.0723476	putative UPF0481 protein At3g02645
Cg6g016680	2.23121	5.82958	1.40079	0.561986	butyrate--CoA ligase AAE11, peroxisomal-like
Cg6g016690	0.131069	0.289635	1.34468	0.377861	---NA---
Cg6g017180	0.992338	0.45733	2.90363	0.243343	vacuolar iron transporter homolog 2-like
Cg6g017490	32.4714	0.23286	1.55541	2.35272	WAT1-related protein At5g07050-like
Cg6g019170	0.220442	8.08311	1.41165	1.18409	uncharacterized protein LOC107177559
Cg6g019450	0.260441	17.8192	4.41512	7.55939	cysteine-rich receptor-like protein kinase 29
Cg6g020570	0.809043	1.29146	0.15512	0.357971	cytochrome P450 85A
Cg6g025130	0.271914	0.692543	0.137379	0.534039	NAC domain-containing protein 100
Cg7g000950	21.054	0.0527861	0.62454	0.359621	laccase-4-like
Cg7g002510	15.7732	0.798831	0.141309	1.47919	protein trichome birefringence-like 33
Cg7g005100	1.19622	0.0179716	0.325197	0.276192	hypothetical protein CISIN_1g025471mg
Cg7g005580	0.432305	0.0702387	0.595569	0.615243	probable membrane-associated kinase regulator 4
Cg7g006430	1.01952	0.158696	1.28833	0.151781	Transferrin family
Cg7g007780	15.9813	428.209	23.6672	0.644377	inhibitor of trypsin and hageman factor
Cg7g007800	0	1.41909	0	0	inhibitor of trypsin and hageman factor
Cg7g007810	0.453538	15.3567	3.69142	0.670073	miraculin-like protein 1
Cg7g007880	0.924848	12.4027	2.14171	0.344239	miraculin-like protein 1
Cg7g011030	0.330427	2.7702	0.590954	0.256998	mitochondrial phosphate carrier protein 3, mitochondrial-like
Cg7g011250	0.28744	3.64953	0.743951	0.376258	ethylene-responsive transcription factor ERF113
Cg7g013210	0.0530529	0.241681	0.0384731	0.297263	transmembrane protein
Cg7g014980	1.20993	0	0.342462	0.180993	uncharacterized acetyltransferase At3g50280-like
Cg7g023090	0.15044	0.800544	5.55876	1.20783	---NA---
Cg7g023600	0.220192	0.178224	1.05373	0.163688	FT-interacting protein 1
Cg8g004220	0.129546	3.59771	0.133966	0	abscisate beta-glucosyltransferase-like
Cg8g005970	0.0470442	0.126805	5.14238	0.287097	uncharacterized protein LOC18034722
Cg8g009150	0.0747678	2.08598	0.440134	0.4212	probable disease resistance protein At4g27220
Cg8g009770	0.105791	0.714711	0.163414	0.373383	geranylgeranyl pyrophosphate synthase, chloroplastic-like
Cg8g010950	0	4.98847	1.14036	1.4689	FAD/NAD(P)-binding oxidoreductase family protein
Cg8g011670	0.0639939	0.776564	0.0354615	0.0481206	wall-associated receptor kinase 2-like
Cg8g017790	0.634838	3.13192	0.495213	0.0764978	cytochrome P450 94C1
Cg8g022260	57.8769	91.6262	407.494	12.1255	17.8 kDa class I heat shock protein-like
Cg8g023030	0.0400537	7.03085	0.758241	0.777051	tropinone reductase homolog At2g29170-like
Cg8g024330	11.0065	22.0909	5.36782	5.75475	asparagine synthetase [glutamine-hydrolyzing] 1
Cg9g001670	1.59904	0.191778	2.28589	2.43358	hypothetical protein CISIN_1g037060mg
Cg9g002600	0.00879102	0.0155447	0.226096	0.00800447	protein GAMETE EXPRESSED 2
Cg9g003410	1.18895	0.992071	4.82816	2.31227	proline-rich receptor-like protein kinase PERK3
Cg9g004560	2.53824	19.5302	4.86143	3.60427	basic 7S globulin
Cg9g005160	18.5273	3.91899	0.439956	4.71716	probable membrane-associated kinase regulator 1
Cg9g005820	0.582096	0.542152	2.26735	0.768908	non-specific lipid-transfer protein-like protein At2g13820
Cg9g006330	2546.26	74.5219	341.794	327.397	early light-induced protein 1, chloroplastic
Cg9g008750	0.682602	0.114995	2.84873	0	---NA---
Cg9g009100	0.476893	12.31	2.99947	1.3022	protein NRT1/ PTR FAMILY 5.2
Cg9g009440	0.0494379	0.0501366	0.683325	0.673078	probable serine/threonine-protein kinase DDB_G0267686 isoform X3
Cg9g010470	0.647719	0.506282	6.23365	1.39163	uncharacterized protein LOC112498792
Cg9g012830	0	1.89197	0.077653	0.694542	putative F-box protein PP2-B12
Cg9g019840	0.0291174	0.282272	0.0526022	0.117797	receptor-like protein EIX2
Cg9g020350	0.356137	4.72495	0.917072	2.32809	heat stress transcription factor B-3
Cg9g023980	1.37199	1.06624	7.16344	0.767703	23.6 kDa heat shock protein, mitochondrial-like
Cg9g023990	1.46101	1.10987	8.89018	0.582298	---NA---
Cg9g025050	0.243011	1.3845	0.286866	0.36561	putative wall-associated receptor kinase-like 11
Cg9g025100	1.06422	0.0740942	0.325404	0.399289	pectinesterase 2
Cg9g029250	3.71771	6.20958	1.3539	20.0114	metal tolerance protein 9-like
CgUng004960	4.13061	0.725914	4.96263	1.95579	metacaspase-1 isoform X2
CgUng004970	2.93297	0.992829	5.94042	2.37317	metacaspase-1 isoform X2
CgUng006100	0.405035	7.33418	1.55376	0.680837	respiratory burst oxidase homolog protein D-like
CgUng006770	0	1.48244	0.169277	0	methanol O-anthraniloyltransferase-like
CgUng018440	0.103636	7.36869	1.23284	0.0327243	---NA---

## Sheet: Table S6
Table S6. The content of six metabolites
Samples	IAA (ng·g-1)	ABA (ng·g-1)	Starch (mg·g-1)	Sugar (mg·g-1)	Chlorophyll (µg·g-1)	Carotenoids (µg·g-1)
SR_1	84.0316	92.2334	7.47888	18.0651	837.861	150.845
SR_2	87.6978	87.7057	8.77571	17.1948	681.588	139.208
SR_3	90.1586	93.0755	14.9132	26.8184	677.658	121.108
DR_1	90.6329	81.9498	9.96121	24.664	901.71	172.424
DR_2	95.6373	83.3215	8.94256	24.6998	752.599	177.894
DR_3	97.8966	80.1548	13.5767	25.8234	739.201	175.619
Hm/Pj_1	101.657	85.0587	11.9938	24.0164	958.85	161.901
Hm/Pj_2	111.06	85.129	10.7704	31.5036	1049.94	173.633
Hm/Pj_3	111.453	79.7032	11.9492	26.2937	807.329	137.403
Hm/Pt_1	81.6866	119.914	17.7955	26.1474	213.392	75.7365
Hm/Pt_2	83.0409	130.988	20.4946	28.9385	285.472	79.6201
Hm/Pt_3	83.3899	140.46	18.3373	34.2962	376.306	107.461

## Sheet: Table S7
Table S7. Genes in module turquoise
GeneID	FPKM value				Description
	Hm/Pt	SR	DR	Hm/Pj
Cg6g019580	19035.9	3697.18	3525.57	6491.19	ribulose bisphosphate carboxylase small chain, chloroplastic-like
Cg2g006580	3176.12	848.667	723.705	1632.16	carbonic anhydrase 2 isoform X1
Cg7g017000	2779.4	1079.64	1591.1	1260.83	chlorophyll a-b binding protein, chloroplastic
Cg2g002080	66.4517	1597.33	944.62	928.386	linoleate 13S-lipoxygenase 2-1, chloroplastic
Cg2g020050	3144.03	722.994	944.69	1223.18	chlorophyll a-b binding protein 151, chloroplastic
Cg8g011230	1794.23	671.279	734.879	938.61	photosystem II reaction center W protein, chloroplastic-like
Cg2g019570	95.5105	1097.87	565.543	875.855	glycine-rich protein-like
Cg3g001930	2351.2	439.03	811.445	658.042	chlorophyll a-b binding protein 8, chloroplastic
Cg2g008910	1622.59	368.137	597.194	730.726	glycine-rich protein A3-like
Cg8g008700	11472.8	623.129	722.764	582.147	fructose-bisphosphate aldolase 1, chloroplastic
Cg3g016550	1291.41	378.44	378.259	680.856	photosystem II 22 kDa protein, chloroplastic
Cg8g022370	1777.71	670.729	749.026	688.848	metallothionein-like protein type 2
Cg1g007100	2569.4	247.845	330.965	335.017	probable xyloglucan endotransglucosylase/hydrolase protein 6
Cg7g011070	191.707	801.919	770.413	653.67	chaperone protein ClpC, chloroplastic
Cg8g021910	220.821	703.494	638.043	934.962	actin-depolymerizing factor 1 isoform X1
Cg5g016350	1349.96	371.332	273.285	627.089	(S)-2-hydroxy-acid oxidase GLO1
Cg7g000770	8645.33	580.861	465.111	942.445	Ribulose bisphosphate carboxylase/oxygenase activase 1, chloroplastic
Cg2g003630	721.471	285.609	340.148	369.66	photosystem II 5 kDa protein, chloroplastic
Cg3g008680	1110.54	188.786	143.688	476.242	phosphoribulokinase, chloroplastic
Cg4g006720	1368.09	417.294	94.5401	320.079	seed lectin
Cg5g023620	1788.13	736.157	952.916	894.109	chlorophyll a-b binding protein CP26, chloroplastic
Cg9g006330	2546.26	130.137	283.9	327.397	early light-induced protein 1, chloroplastic
Cg2g042640	638.611	276.258	286.616	401.55	triose phosphate/phosphate translocator, chloroplastic isoform X1
Cg4g003490	969.182	545.814	508.039	502.451	BURP domain protein RD22
Cg3g025510	616.941	318.048	311.032	492.629	glyceraldehyde-3-phosphate dehydrogenase B, chloroplastic
Cg8g006080	860.916	274.9	250.802	268.492	#N/A
Cg4g006670	994.001	133.914	118.999	340.921	glycine dehydrogenase (decarboxylating), mitochondrial
Cg8g001540	656.903	165.256	96.9028	299.458	probable aquaporin PIP2-8
Cg4g014280	1060.6	81.7943	39.7137	221.21	fructose-bisphosphate aldolase, cytoplasmic isozyme 1
Cg3g023460	960.036	414.523	309.618	433.695	cysteine proteinase 15A-like
Cg2g009300	3915.26	366.37	267.022	582.155	glyceraldehyde-3-phosphate dehydrogenase A, chloroplastic
Cg8g017180	587.742	327.221	302.773	328.728	glutamate decarboxylase-like
Cg1g024920	785.661	269.154	311.001	462.282	photosystem I reaction center subunit N, chloroplastic-like
Cg1g007640	681.542	163.489	130.2	297.814	probable mannitol dehydrogenase
Cg4g010670	59.1229	233.683	233.978	153.774	malate dehydrogenase, mitochondrial
Cg5g001790	141.2	391.502	344.875	299.674	V-type proton ATPase subunit E
Cg2g008920	726.365	237.731	269.652	421.077	glycine-rich protein A3-like
Cg8g005760	506.027	201.423	187.839	335.77	Cytochrome b6-f complex subunit 7
Cg5g034460	374.973	168.312	117.319	259.788	histone H1
Cg7g020500	394.827	142.238	165.488	201.308	#N/A
Cg8g017520	95.5822	359.545	431.169	341.554	Alpha/beta-Hydrolases superfamily protein isoform 1
Cg9g006270	342.179	116.449	216.378	153.68	1,2-dihydroxy-3-keto-5-methylthiopentene dioxygenase 1
Cg2g032850	532.959	237.03	200.007	343.995	chloroplast stem-loop binding protein of 41 kDa b, chloroplastic
Cg6g017060	748.289	245.398	372.851	264.244	magnesium-protoporphyrin IX monomethyl ester [oxidative] cyclase, chloroplastic
Cg5g006480	1118.55	374.486	389.382	384.907	glyceraldehyde-3-phosphate dehydrogenase, cytosolic-like
Cg7g000940	604.603	146.188	110.334	263.829	sedoheptulose-1,7-bisphosphatase, chloroplastic
Cg6g004600	204.45	752.733	672.371	768.331	kinesin-like protein KIN-10B
Cg5g032360	313.1	210.803	294.441	169.244	small ubiquitin-related modifier 1-like
Cg7g019060	199.932	402.229	352.151	381.213	ubiquitin-40S ribosomal protein S27a
Cg2g033270	44.7139	327.847	260.118	289.291	protein PLANT CADMIUM RESISTANCE 2-like
Cg9g005230	11.3648	180.214	157.532	170.152	sugar transport protein 13
Cg5g001080	281.504	482.633	497.474	449.361	B2 protein-like
Cg4g012610	1098.6	284.414	339.62	230.016	GDP-L-galactose phosphorylase 2
Cg7g020970	243.037	404.489	414.507	323.237	40S ribosomal protein S9-2
Cg4g001050	284.988	54.2291	117.539	71.8021	aspartyl protease family protein At5g10770-like
Cg2g023010	380.197	286.76	313.644	249.962	probable histone H2A.1
Cg9g017500	20.6757	282.951	199.27	241.206	protein EARLY RESPONSIVE TO DEHYDRATION 15-like
Cg8g018870	273.939	130.432	132.908	217.3	superoxide dismutase [Cu-Zn], chloroplastic
Cg8g003210	92.2808	220.355	192.025	199.588	#N/A
Cg2g006680	492.2	157.586	139.341	221.19	50S ribosomal protein L12, chloroplastic-like
Cg5g005740	500.917	180.231	136.473	271.316	elongation factor Tu, chloroplastic
Cg8g001580	616.69	139.34	91.6907	189.642	glycerate dehydrogenase
Cg2g045100	932.303	64.1873	48.5045	159.632	peroxidase 42
Cg7g018540	202.071	53.9039	42.5091	168.784	hypothetical protein CUMW_020860
Cg5g010340	544.837	126.526	240.914	220.16	agamous-like MADS-box protein AGL65 isoform X1
Cg1g027560	12.4262	191.955	111.941	128.681	chalcone synthase
Cg2g021790	878.033	56.0005	118.22	71.1291	chlorophyll a-b binding protein 13, chloroplastic
Cg3g020490	542.602	183.229	168.904	312.372	ATP synthase delta chain, chloroplastic-like
Cg6g013470	149.82	279.306	262.62	194.507	40S ribosomal protein S28-2
Cg6g005940	281.517	75.5937	79.9043	148.416	fructose-1,6-bisphosphatase, chloroplastic
Cg2g032760	401.547	322.21	271.865	281.664	#N/A
Cg1g004940	502.256	174.296	200.124	215.481	thioredoxin H-type
Cg9g003000	349.898	92.621	95.6928	180.831	protein RALF-like 33
Cg7g023370	332.906	102.433	134.176	181.391	carotenoid 9,10(9',10')-cleavage dioxygenase 1
Cg7g004730	104.947	278.509	323.296	274.315	actin-depolymerizing factor 2-like
Cg7g012370	317.891	120.157	77.4164	170.17	glutathione S-transferase F9-like
Cg1g010480	330.113	80.5179	82.3569	174.925	germin-like protein subfamily 3 member 1
Cg7g018910	19.9332	267.38	221.144	227.579	alpha-glucan water dikinase, chloroplastic isoform X1
Cg5g001070	185.108	475.518	479.311	441.658	B2 protein-like
Cg1g000980	383.135	130.909	58.3679	80.115	ganglioside-induced differentiation-associated protein 2
Cg7g011640	18.0054	188.88	177.472	142.344	ribonuclease TUDOR 1
Cg2g028090	263.886	149.81	112.255	95.3733	Lactoylglutathione lyase / glyoxalase I family protein
Cg6g004800	309.441	218.941	220.91	211.39	NAD(P)-binding Rossmann-fold superfamily protein isoform 1
Cg9g027010	139.07	246.685	242.42	192.054	60S ribosomal protein L36-2-like
Cg5g036730	213.051	26.3782	23.7132	76.7429	monothiol glutaredoxin-S9
Cg5g004770	1610.7	188.582	187.067	227.918	aldehyde dehydrogenase family 2 member B4, mitochondrial-like
Cg8g019650	87.4249	228.562	214.778	172.044	cell division cycle protein 48 homolog
Cg2g031630	331.636	91.5455	147.572	76.2516	serine/arginine-rich splicing factor SR30
Cg2g033260	48.0968	184.913	139.77	155.517	protein PLANT CADMIUM RESISTANCE 2-like
Cg3g014490	580.949	35.851	25.0006	106.327	protein DMR6-LIKE OXYGENASE 2-like
Cg3g002560	1952.27	97.0898	106.509	168.121	ferredoxin
Cg8g023670	706.73	213.896	258.844	185.738	#N/A
Cg2g033720	94.4359	158.284	153.679	182.499	mitogen-activated protein kinase 9
Cg2g011770	529.284	154.284	108.585	115.971	caffeic acid 3-O-methyltransferase
Cg3g006900	78.6696	242.882	191.515	212.521	isocitrate dehydrogenase [NADP]
Cg9g017510	15.935	207.342	149.258	181.495	GTP-binding protein BRASSINAZOLE INSENSITIVE PALE GREEN 2, chloroplastic
Cg5g043430	714.894	202.072	134.905	238.671	transketolase, chloroplastic
Cg5g016160	508.443	173.75	162.721	200.947	heme-binding protein 2
Cg5g004290	372.019	135.08	132.006	150.612	transcription factor MYB1R1
Cg7g019340	264.993	118.477	124.48	87.6131	2-methylene-furan-3-one reductase-like
Cg1g004510	467.887	108.28	94.0022	148.609	soluble inorganic pyrophosphatase
Cg8g023850	575.942	66.6685	60.3485	178.244	cytochrome P450 86A1-like
Cg8g003970	453.639	129.543	152.564	195.722	---NA---
Cg3g012340	572.432	409.321	402.578	411.285	superoxide dismutase [Cu-Zn]
Cg6g000520	210.929	60.2183	55.0341	101.727	S-norcoclaurine synthase-like
Cg9g021720	132.513	61.3963	98.9374	26.392	remorin 4.1-like
Cg2g025840	18.9759	85.794	67.3633	98.0248	uncharacterized protein LOC102624004
Cg3g012020	325.753	116.697	142.627	151.018	Nodulation-signaling pathway protein isoform 1
Cg2g040090	11.6707	72.5245	62.2407	110.945	15.4 kDa class V heat shock protein
Cg4g017540	171.724	251.282	255.663	204.117	RING-box protein 1a
Cg8g003800	9.62991	187.831	169.698	147.875	UDP-glycosyltransferase 84B1-like
Cg3g020830	334.466	117.416	136.63	87.3835	hypothetical protein CR513_29274, partial
Cg7g007560	331.167	145.064	115.996	173.178	malate dehydrogenase [NADP], chloroplastic
Cg8g014080	100.995	230.558	232.132	190.863	60S ribosomal protein L10a-3
Cg2g008930	173.868	280.698	287.345	245.584	60S ribosomal protein L11
Cg2g028850	809.901	175.391	152.374	58.8415	purple acid phosphatase 3-like
Cg3g011730	120.984	217.012	234.825	201.27	40S ribosomal protein S24-1
Cg4g021230	28.7766	108.336	83.7587	93.1141	---NA---
Cg6g016720	154.689	88.6474	68.5827	100.668	phytoene synthase
Cg9g026340	33.3312	184.322	158.327	230.459	serine/arginine-rich splicing factor RS40 isoform X2
Cg3g007400	31.9671	99.0414	96.678	72.7382	MOB kinase activator-like 1A
Cg2g037800	26.8314	107.339	112.238	70.5452	glutathione transferase, putative
Cg2g001370	200.658	42.338	26.5462	73.118	peroxidase 15-like
Cg9g029110	577.382	128.856	115.191	196.133	phosphoglycerate kinase, chloroplastic
Cg3g000940	117.691	237.369	211.47	289.146	heat shock 70 kDa protein 6, chloroplastic-like
Cg4g024570	195.082	38.3779	21.9416	61.8296	CBL-interacting serine/threonine-protein kinase 6
Cg7g012200	377.004	108.169	111.229	147.256	uncharacterized oxidoreductase At1g06690, chloroplastic
Cg4g001180	75.901	159.213	157.621	105.241	ER membrane protein complex subunit 4
Cg1g013630	24.4832	142.688	106.246	175.212	GDSL esterase/lipase APG-like
Cg3g010360	468.657	99.6521	114.323	77.5039	GDP-mannose 3,5-epimerase 1
Cg5g007160	62.6752	143.564	128.06	103.024	60S ribosomal protein L37a
Cg5g001250	61.533	196.524	164.948	173.185	chromatin modification-related protein EAF1 isoform X2
Cg8g022990	305.289	83.7615	70.2657	120.993	protein plastid transcriptionally active 16, chloroplastic
Cg2g000250	58.3428	191.637	193.992	180.601	YTH domain-containing protein ECT2-like
Cg1g014660	157.44	242.459	242.809	225.173	60S ribosomal protein L37-3
Cg8g014100	280.249	29.0931	39.9139	71.5921	protein BIC2-like
Cg3g012720	34.9968	185.459	133.706	149.986	adenine phosphoribosyltransferase 1-like
Cg2g032770	261.43	178.678	155.019	156.66	DUF724 domain-containing protein 3 isoform X1
Cg6g010660	64.8724	187.758	161.097	92.4228	vacuolar-sorting receptor 1-like
Cg5g011430	69.4506	260.045	257.653	214.312	glycine-rich RNA-binding protein 2, mitochondrial
Cg1g019020	177.506	79.961	83.7613	107.462	protein TSS
Cg3g005020	20.0041	82.4471	54.399	83.4156	ETHYLENE INSENSITIVE 3-like 1 protein
Cg1g006820	37.7851	111.692	120.907	80.8365	Transmembrane protein
Cg2g018640	204.757	112.712	122.449	127.034	aspartic proteinase A1
Cg8g004900	160.65	72.8849	45.2992	94.2125	probable carboxylesterase 12
Cg9g002120	158.08	275.641	275.253	232.35	60S ribosomal protein L19-1
Cg1g005260	212.227	85.7478	121.026	66.2369	metallothiol transferase FosB-like
Cg4g021520	246.03	96.5118	106.093	95.5384	La-related protein 6 isoform 1
Cg5g002180	367.736	154.805	146.813	142.419	2-C-methyl-D-erythritol 2,4-cyclodiphosphate synthase, chloroplastic
Cg5g042290	115.924	220.291	310.806	227.03	remorin isoform X1
CgUng005700	36.648	123.537	137.184	88.3372	peptidyl-prolyl cis-trans isomerase
Cg3g021880	33.0796	154.111	135.102	102.562	probable disease resistance protein At4g33300
CgUng003910	449.584	101.995	76.0665	130.176	probable tRNA N6-adenosine threonylcarbamoyltransferase
Cg2g022780	228.39	146.321	145.651	117.726	uncharacterized protein LOC18054574
Cg5g041890	134.066	26.538	20.5958	74.3328	hypothetical protein CUMW_134580
Cg9g010350	521.352	37.5424	40.6892	10.0365	beta-amylase 1, chloroplastic-like
Cg5g003490	202.406	88.8531	111.775	95.7263	putative voltage-dependent anion-selective channel
Cg6g006740	146.012	68.419	56.4104	77.9784	---NA---
Cg7g000040	249.123	138.124	115.312	169.143	triosephosphate isomerase, cytosolic
Cg2g031510	67.1748	124.236	136.025	92.8362	40S ribosomal protein S21-2
Cg8g018420	9.21658	106.406	75.3513	93.5206	cysteine-rich receptor-like protein kinase 10
Cg2g014580	125.926	46.0734	64.2259	87.7927	photosystem II repair protein PSB27-H1, chloroplastic
Cg1g007660	206.203	80.3031	69.0044	112.852	probable mannitol dehydrogenase
Cg4g001920	145.673	227.861	216.082	185.792	40S ribosomal protein S11
Cg8g023680	255.556	108.768	132.11	85.3556	serine/arginine-rich splicing factor SR45a-like isoform X1
Cg9g023510	73.6334	145.036	138.981	124.786	60S ribosomal protein L15
Cg8g004240	162.233	263.295	249.12	237.55	polyadenylate-binding protein 8
Cg6g000160	190.112	83.1098	93.4723	115.244	phosphoglycolate phosphatase 1B, chloroplastic
Cg4g018220	195.046	17.3309	20.6802	57.9218	pectinesterase
Cg4g014350	92.136	177.439	166.536	129.212	40S ribosomal protein S17-3
Cg6g002700	92.8774	145.662	132.993	132.791	40S ribosomal protein S23
Cg7g012490	156.507	45.8919	53.6097	57.9679	GDSL esterase/lipase At2g42990-like
Cg6g005110	121.668	30.0949	18.6577	62.0507	tropinone reductase homolog
Cg4g024120	58.8529	192.622	163.53	209.97	nucleoid-associated protein At2g24020, chloroplastic
Cg7g002210	111.636	155.095	144.207	136.834	RING-H2 finger protein ATL66-like
Cg2g022550	84.3825	47.9546	66.597	15.1664	calcium-binding protein PBP1
Cg6g013480	126.289	193.773	198.56	164.774	40S ribosomal protein S5
Cg2g033140	264.203	157.555	143.529	169.607	3-oxo-Delta(4,5)-steroid 5-beta-reductase-like
Cg4g024840	100.239	17.3812	15.0957	54.4933	probable E3 ubiquitin-protein ligase RHY1A
Cg5g040890	370.796	173.592	167.259	180.294	rhodanese-like domain-containing protein 4, chloroplastic
Cg2g032340	15.2923	66.4258	30.2483	55.9924	histidine kinase CKI1-like
Cg4g010770	104.217	176.026	143.323	171.757	60S ribosomal protein L13-1
Cg4g001100	229.487	55.5925	62.4857	82.532	#N/A
Cg2g022820	12.8859	86.7101	88.6279	71.3067	organelle RRM domain-containing protein 2, mitochondrial
Cg5g006260	125.225	50.014	46.9228	82.5871	haloacid dehalogenase-like hydrolase domain-containing protein At3g48420
Cg8g014270	160.115	46.9069	37.5537	71.2248	protein RALF-like 27
Cg7g022710	29.8145	120.685	133.356	84.1782	pheophytinase, chloroplastic
Cg4g006800	111.434	36.4812	22.5667	53.8084	UDP-sulfoquinovose synthase, chloroplastic
Cg7g020530	113.449	37.6287	36.3774	34.4999	protein NRT1/ PTR FAMILY 2.13-like
Cg8g003850	429.388	37.7682	54.1133	11.4183	probable cinnamyl alcohol dehydrogenase 1
Cg1g029290	492.707	56.1787	66.7852	30.7501	PLAT domain-containing protein 3-like
Cg9g006510	212.818	95.7407	91.5285	110.723	uncharacterized protein LOC18031947
Cg2g030200	124.577	24.2634	36.0154	53.7623	protein FANTASTIC FOUR 1
Cg7g006560	122.016	31.7731	19.7456	46.468	caffeoylshikimate esterase-like
Cg4g017600	203.105	39.9829	47.9805	67.2641	protein STRICTOSIDINE SYNTHASE-LIKE 4-like
Cg5g018160	422.108	30.9648	37.8761	20.16	probable pectinesterase/pectinesterase inhibitor 34
CgUng003810	407.874	82.3594	63.8458	49.8123	geraniol 8-hydroxylase
Cg1g004080	162.015	229.325	221.338	192.727	U1 small nuclear ribonucleoprotein 70 kDa
Cg4g014140	162.151	229.716	230.129	258.261	protein CWC15 homolog
Cg1g021740	42.4776	116.284	76.4017	99.0714	beta-amyrin synthase
Cg2g025970	134.439	47.6142	50.5917	65.1962	#N/A
Cg7g018710	627.48	70.6327	71.7473	85.1798	glutamate--glyoxylate aminotransferase 2
Cg6g014740	429.638	277.377	257.645	301.237	2-Cys peroxiredoxin BAS1, chloroplastic
Cg7g005000	84.8846	142.715	137.549	109.942	60S ribosomal protein L23a
Cg4g024410	415.297	37.1266	46.8951	71.8423	temperature-induced lipocalin-1
Cg4g014040	7.09894	70.2853	58.4184	38.6549	oligopeptide transporter 1-like
Cg9g016260	339.897	62.5513	55.7522	103.629	ferredoxin-dependent glutamate synthase, chloroplastic
Cg5g037720	120.39	47.3313	34.5279	63.6851	sucrose synthase 2
Cg4g013070	153.403	233.303	246.934	218.877	40S ribosomal protein S8
Cg3g012710	158.758	43.6696	44.9587	21.9268	zinc finger protein ZAT10-like
Cg1g007330	82.3402	34.9645	35.8917	69.3766	phosphoenolpyruvate carboxykinase (ATP)
Cg2g009490	77.4277	145.367	156.531	124.943	40S ribosomal protein S27-2
Cg2g038570	86.2466	39.5836	35.7441	45.0858	protein G1-like1
Cg6g009700	113.5	197.129	191.939	186.346	40S ribosomal protein S4-1
Cg9g002740	89.3756	140.856	135.58	114.333	60S ribosomal protein L22-2
Cg3g000330	85.2097	176.066	172.969	149.542	elongation factor 1-gamma
Cg2g013290	121.532	42.2393	58.4173	14.4542	ethylene-responsive transcription factor 9
Cg1g009460	2211.21	100.871	23.4583	58.3439	inorganic pyrophosphatase 1-like
Cg7g013690	32.6375	154.088	144.961	144.452	nucleolin 2 isoform X1
Cg6g012460	228.721	192.108	165.19	208.844	ankyrin repeat domain-containing protein 2B-like
Cg2g036170	163.032	74.5034	65.2232	103.339	universal stress protein A-like protein
Cg9g011760	9.74827	79.4651	64.4843	59.9989	probable leucine-rich repeat receptor-like protein kinase At1g35710
Cg4g015310	103.607	148.901	140.359	130.452	60S ribosomal protein L13-1
Cg1g016830	145.548	55.6628	62.2334	46.9819	cytochrome c1-2, heme protein, mitochondrial-like
Cg4g020060	274.334	50.4173	65.5638	17.6253	organic cation/carnitine transporter 7-like isoform X1
Cg7g013400	219.019	44.6445	70.8535	48.2163	delta(24)-sterol reductase
Cg7g006790	103.21	143.314	123.799	153.201	adenosine kinase 2
Cg2g009480	84.7766	154.626	139.62	159.159	40S ribosomal protein S27-2
Cg2g042600	228.586	37.7281	42.9246	39.1276	protein E6-like
Cg5g040250	150.547	70.5548	49.4813	100.097	auxin-responsive protein SAUR32
Cg6g006440	333.535	177.049	73.595	75.7926	sulfoquinovosyl transferase SQD2
Cg1g001000	137.638	37.9857	44.9445	47.7544	thiosulfate sulfurtransferase 16, chloroplastic-like isoform X1
Cg8g001290	138.428	48.085	40.6406	79.6981	NAD_binding_8 domain-containing protein
Cg2g019480	211.594	338.296	324.377	308.268	eukaryotic translation initiation factor 1A
Cg7g014990	283.76	48.3033	28.8523	69.4931	protein CHUP1, chloroplastic
Cg5g013540	124.816	246.236	250.513	226.899	40S ribosomal protein S3a
Cg8g005870	139.154	41.563	34.2595	77.2957	protein TIC 62, chloroplastic
Cg5g017420	252.145	49.0834	43.2229	78.8113	translation initiation factor IF-2, chloroplastic
Cg3g018590	27.7701	75.8773	75.6144	52.602	60S ribosomal protein L3
Cg9g005530	212.434	124.206	111.799	142.039	FRIGIDA-like protein 4a
Cg8g001280	93.8744	53.1721	75.9533	52.7762	protein CHAPERONE-LIKE PROTEIN OF POR1, chloroplastic-like
Cg1g013940	292.85	25.4365	36.1944	5.31285	NADP-dependent malic enzyme
Cg2g023240	0.972738	58.7008	44.0773	21.2304	#N/A
Cg6g025390	142.845	78.6392	111.03	87.9073	chaperone protein ClpB3, chloroplastic
Cg5g041930	82.4757	26.5465	25.1694	46.9444	ascorbate transporter, chloroplastic isoform X1
Cg2g023250	2.27808	106.627	76.6392	54.1706	(E)-beta-farnesene synthase-like
Cg9g010700	11.4731	69.8062	63.846	46.7405	60S ribosomal protein L36-3
Cg1g020210	0.273185	163.985	145.506	80.2676	putative UPF0481 protein At3g02645
Cg4g001270	178.255	95.9067	96.0291	121.97	phospholipid hydroperoxide glutathione peroxidase 1, chloroplastic
Cg3g011760	116.083	54.3157	53.7709	75.4309	Rubredoxin, putative
Cg9g027530	190.17	156.741	145.149	138.104	40S ribosomal protein S10-1-like
Cg5g035090	135.141	43.8318	66.3512	32.0961	serine/threonine-protein kinase STY13
Cg7g010590	147.726	259.607	260.755	227.698	60S ribosomal protein L7a-1
Cg9g021280	317.202	22.1725	22.7649	48.3488	magnesium-chelatase subunit ChlH, chloroplastic
Cg7g017030	381.102	44.181	67.6603	39.9121	REF/SRPP-like protein At1g67360
Cg6g006000	107.424	35.5365	52.677	44.9071	heme-binding-like protein At3g10130, chloroplastic
Cg2g017280	44.7582	135.591	122.251	132.363	60S ribosomal protein L5
Cg9g029100	198.448	76.7379	80.4105	55.947	phosphoglycerate kinase, cytosolic
CgUng005860	237.282	127.925	112.62	144.042	triosephosphate isomerase, chloroplastic
Cg7g002430	236.889	43.1992	67.4624	53.9412	ferritin-3, chloroplastic
Cg5g006020	120.189	59.1438	67.6442	70.3704	protein-L-isoaspartate O-methyltransferase 1 isoform X2
Cg2g006560	93.3213	41.8322	44.8377	67.4849	protease Do-like 1, chloroplastic
Cg6g006790	113.823	39.82	56.7778	60.6864	clathrin light chain 3-like
Cg5g040140	179.124	60.3849	91.6645	86.0631	CBL-interacting serine/threonine-protein kinase 9
CgUng003940	91.1239	44.5201	37.9344	37.5386	hypothetical protein CICLE_v10002876mg
Cg6g025030	100.549	53.3536	63.2462	21.2223	probable calcium-binding protein CML45
Cg2g046430	78.6046	25.6994	32.5917	50.6587	oligopeptide transporter 3
Cg1g000570	12.1677	75.334	89.0557	44.7302	amino acid transporter AVT3B-like
Cg7g003760	335.407	38.3271	101.177	4.51966	uncharacterized protein LOC18043918
Cg8g017450	166.552	228.12	213.049	209.605	nascent polypeptide-associated complex subunit beta-like
Cg2g017090	145.373	16.7423	12.8644	39.9174	beta-hexosaminidase 2
Cg1g016240	5.67555	48.4545	39.957	39.5054	pleiotropic drug resistance protein 1-like
Cg4g007800	193.007	119.839	114.212	138.281	GTP-binding nuclear protein Ran-3
Cg6g008110	177.898	135.252	113.975	114.861	Calcium-binding EF-hand
Cg3g023360	107.784	41.7452	44.8687	60.3811	cysteine proteinase RD21a-like
Cg6g023830	136.05	89.2233	86.8208	73.3584	thioredoxin H2
Cg2g004460	99.1101	38.9375	50.4492	64.5693	sanguinarine reductase isoform X1
Cg5g044500	544.437	197.976	140.779	171.674	nucleoside diphosphate kinase 1
Cg8g001780	74.5368	27.3873	24.4442	47.9613	subtilisin-like protease SBT1.6
Cg9g026210	164.949	20.7915	26.8569	44.8397	ATP-dependent Clp protease ATP-binding subunit clpX
Cg1g012820	25.4724	69.3177	60.8339	65.8123	putative disease resistance protein RGA3
Cg2g047400	29.7537	61.8392	46.1842	75.8898	2-C-methyl-D-erythritol 4-phosphate cytidylyltransferase, chloroplastic-like
Cg5g041840	71.2654	26.6493	18.3543	36.9366	bifunctional L-3-cyanoalanine synthase/cysteine synthase 1, mitochondrial
Cg2g022860	144.541	33.0784	51.849	27.0235	alpha-copaene synthase-like
Cg7g019360	111.579	83.1736	87.6183	80.5334	---NA---
Cg4g001000	96.1277	13.9728	20.8085	37.7109	aspartyl protease family protein At5g10770-like
Cg8g021800	50.6929	123.909	105.038	117.587	40S ribosomal protein S15a-1
Cg7g011520	121.42	76.4882	70.2494	91.3009	ankyrin repeat family protein
Cg3g003140	47.914	110.338	109.082	103.36	nascent polypeptide-associated complex subunit alpha-like protein 1
Cg3g022180	171.186	107.705	101.072	134.436	30S ribosomal protein S9, chloroplastic
Cg7g023850	65.9291	31.7227	25.3537	37.0889	callose synthase 2 isoform X1
Cg9g025370	102.203	48.4113	47.5028	71.3991	protein LOW PSII ACCUMULATION 2, chloroplastic
Cg4g019010	94.9729	54.3196	71.8728	44.3824	PHD finger protein ALFIN-LIKE 4
Cg5g040810	184.381	84.73	79.0317	81.9878	cyclic nucleotide-gated ion channel 1-like
Cg5g021380	240.012	95.3737	91.7907	95.1754	TVP38/TMEM64 family membrane protein slr0305-like
Cg4g020870	92.5696	170.309	171.815	143.722	60S ribosomal protein L7-2
Cg5g044950	21.5029	66.2523	57.9832	50.2008	putative Ent-kaurenoic acid oxidase
Cg8g007160	107.169	45.0456	55.5367	39.1956	isoflavone reductase homolog PCBER
Cg6g003980	223.792	101.741	82.8067	89.1264	soluble inorganic pyrophosphatase 4
Cg4g015070	168.545	60.8731	72.9757	43.947	serine acetyltransferase 5
Cg2g037480	62.985	117.594	112.049	106.892	serine/threonine-protein kinase pakA isoform X3
Cg3g015390	142.107	22.4476	12.4515	43.6473	senescence-associated family protein
Cg1g004210	79.4371	42.9577	44.7926	52.7214	phosphatidylinositol transfer protein 3
Cg7g007290	146.237	80.4799	97.6992	73.0086	serine carboxypeptidase-like
Cg8g008070	12.816	68.2668	61.1568	68.7071	bifunctional epoxide hydrolase 2
Cg3g021120	50.8445	96.4258	101.81	84.9794	polyadenylate-binding protein 2-like
Cg6g016820	166.528	84.6152	78.7522	90.333	UTP--glucose-1-phosphate uridylyltransferase
Cg5g008730	464.633	30.6076	25.22	64.9484	elongation factor G-2, chloroplastic
Cg7g014770	122.412	44.6354	44.8105	61.9065	tRNA-dihydrouridine synthase B
Cg5g004600	129.615	59.0551	45.3517	75.992	nucleobase-ascorbate transporter 6
Cg5g043030	335.606	19.9077	27.1849	5.74676	probable carboxylesterase 8
Cg5g002240	62.3349	111	108.486	88.0087	40S ribosomal protein S10-1
Cg6g002970	97.6207	39.7865	45.7248	54.4773	thioredoxin-like protein AAED1, chloroplastic
Cg4g000940	224.591	98.1559	96.7416	93.757	CONSTANS-like 5 protein
Cg3g019320	109.326	167.077	179.859	166.177	uncharacterized protein LOC18043132
Cg5g032910	50.1677	122.96	118.232	105.16	26S proteasome regulatory subunit 4 homolog A
Cg1g002640	251.979	33.2829	41.3579	61.5408	zeaxanthin epoxidase, chloroplastic
Cg2g046410	238.95	60.8208	48.6993	67.9704	pollen-specific leucine-rich repeat extensin-like protein 1 isoform X1
Cg2g045060	106.412	24.8547	17.527	36.4149	Senescence regulator
Cg5g026410	33.0665	71.2735	78.6279	61.0656	#N/A
Cg7g022490	13.9893	82.2473	67.4343	70.6153	Plant calmodulin-binding protein-related, putative isoform 1
Cg1g026320	151.632	57.9588	50.8698	66.6506	protein BOLA2
Cg6g025780	72.7867	26.4594	21.4835	39.3909	UDP-glycosyltransferase 83A1-like
Cg6g001570	12.7542	62.7567	51.8866	41.0297	O-acyltransferase WSD1-like
Cg8g004120	310.016	13.3788	13.4002	37.5186	leucine-rich repeat family protein
Cg2g030120	176.206	37.8415	49.3633	57.5158	UPF0603 protein At1g54780, chloroplastic
Cg2g022250	130.889	37.6242	40.4596	52.099	hypothetical protein CUMW_224830
Cg3g019430	340.702	113.421	106.668	112.974	subtilisin-like protease SBT3.17
Cg4g021250	18.6107	82.7839	65.0046	65.6249	OSBP(oxysterol binding protein)-related protein 4B
Cg5g009890	61.245	100.378	96.0265	79.9685	60S ribosomal protein L24
Cg4g010780	42.926	133.186	127.759	152.79	multiple organellar RNA editing factor 8, chloroplastic/mitochondrial-like
Cg7g020490	88.7383	37.8026	43.0479	47.7359	dnaJ homolog subfamily B member 1
Cg3g021310	48.2306	84.581	104.406	60.3161	ABSCISIC ACID-INSENSITIVE 5-like protein 5
Cg4g018490	34.6462	85.0774	57.9204	65.1285	3-ketoacyl-CoA synthase 10
Cg7g002280	170.386	43.352	34.5135	52.7747	UTP--glucose-1-phosphate uridylyltransferase 3, chloroplastic
Cg7g016600	21.4654	144.028	125.63	177.815	photosynthetic NDH subunit of lumenal location 5, chloroplastic
Cg2g015160	17.3886	97.1439	79.1652	90.5823	diacylglycerol kinase 5-like isoform X1
Cg2g000970	254.824	52.0799	32.8869	48.2575	protein YLS3
Cg4g002280	4.23851	57.617	44.6123	48.5853	Tetratricopeptide-like helical
Cg9g027120	188.501	67.6062	53.8779	89.7678	short-chain dehydrogenase TIC 32, chloroplastic-like
Cg2g014750	85.6674	55.1717	34.5192	59.0012	two pore calcium channel protein 1
Cg8g013170	78.3668	38.5787	25.2341	45.2199	momilactone A synthase-like
Cg7g016940	294.249	118.444	96.004	115.686	non-specific lipid transfer protein GPI-anchored 1-like
Cg2g044660	150.791	39.3668	44.5301	56.1651	NAD_binding_10 domain-containing protein
Cg6g011550	284.947	154.635	164.116	133.754	hypothetical protein CISIN_1g029883mg
Cg5g028700	25.2488	82.5364	76.8637	89.0983	2-isopropylmalate synthase 2, chloroplastic-like
Cg5g001630	151.758	42.0091	54.1553	28.69	mitochondrial adenine nucleotide transporter ADNT1-like
Cg1g009050	116.101	14.4688	7.76765	36.379	flavonol synthase/flavanone 3-hydroxylase-like
Cg9g009420	111.729	190.076	198.974	178.627	60S ribosomal protein L23
Cg4g006440	148.571	82.6348	101.075	89.6775	NADH dehydrogenase [ubiquinone] iron-sulfur protein 7, mitochondrial
Cg6g007540	22.1121	91.7512	65.99	89.8257	alcohol dehydrogenase-like 7
CgUng001800	79.2338	38.2061	40.2113	58.045	probable acyl-activating enzyme 17, peroxisomal
Cg5g041960	26.4725	84.4536	81.0166	58.4531	U-box domain-containing protein 33 isoform X1
Cg7g000880	203.2	124.052	120.846	98.4875	peptidyl-prolyl cis-trans isomerase FKBP20-1
Cg6g005690	68.3782	2.57519	6.63873	23.9044	#N/A
Cg2g047090	158.611	48.1032	58.8444	39.4441	endoglucanase 25-like
Cg7g004750	69.7512	162.742	173.575	153.646	40S ribosomal protein S15a-1
Cg5g024790	33.8153	148.44	153.761	127.637	glycine--tRNA ligase, mitochondrial 1-like
Cg6g005190	100.742	17.5158	11.5373	36.8846	tropinone reductase homolog
Cg3g007070	140.08	76.0912	66.0126	82.0172	cysteine proteinase inhibitor 12
Cg9g021700	142.995	19.7534	15.6323	39.1511	putative elongation factor TypA-like SVR3, chloroplastic
Cg7g019320	184.849	74.6193	54.089	82.3093	carbonic anhydrase 2 isoform X3
Cg6g008310	127.652	33.5311	47.0484	51.5361	---NA---
Cg6g013440	51.2747	81.1926	82.6488	63.9377	eukaryotic translation initiation factor 3 subunit C-like
Cg4g011570	79.4239	16.553	17.2646	33.7307	FKBP-type peptidyl-prolyl cis-trans isomerase 5 isoform 2
Cg8g000920	65.9772	22.0999	23.9706	32.4595	signal recognition particle 43 kDa protein, chloroplastic
Cg5g024930	67.2308	138.656	144.818	123.117	60S ribosomal protein L30
Cg3g023320	87.4108	38.7663	44.7972	69.7038	jacalin-related lectin 3-like isoform X1
Cg2g030990	23.3881	59.8809	62.5227	46.2978	serine--tRNA ligase
Cg5g042890	34.8803	96.4025	89.5192	72.2023	ubiquitin-related modifier 1 homolog 2
Cg1g007550	421.836	87.9659	81.7193	127.932	serine hydroxymethyltransferase, mitochondrial
Cg6g015280	42.3521	111.068	113.262	103.205	probable small nuclear ribonucleoprotein G
Cg3g019150	25.8727	62.0245	66.8078	50.3288	cleavage stimulating factor 64
Cg3g000310	77.6227	28.7716	22.055	27.8361	putative 12-oxophytodienoate reductase 11
Cg7g020690	146.825	83.439	64.6435	80.981	mitochondrial outer membrane protein porin of 36 kDa
Cg1g014010	116.071	26.8603	40.4617	23.9973	#N/A
Cg8g022390	105.321	42.0302	39.0243	56.71	outer envelope pore protein 16, chloroplastic
Cg4g017960	93.6158	36.4884	38.4312	44.5604	peroxiredoxin Q, chloroplastic
Cg7g010110	92.8856	143.812	148.901	125.103	acetolactate synthase 3, chloroplastic
Cg9g018990	3.15746	47.6665	47.5685	34.6093	ABSCISIC ACID-INSENSITIVE 5-like protein 4
Cg5g005650	83.7653	179.11	160.52	178.741	protein NBR1 homolog isoform X1
Cg2g021850	77.0628	37.0732	36.305	44.0522	dynein light chain 2, cytoplasmic
Cg8g004860	186.872	64.0899	48.7547	64.1959	probable carboxylesterase 12
Cg9g029620	74.1383	29.4416	35.1276	40.3192	YTH domain-containing protein ECT2 isoform X1
Cg1g014620	117.918	38.386	45.3346	26.1584	Sulfite exporter TauE/SafE family protein 3
Cg4g021860	200.755	63.1005	64.4159	28.335	histone H4
Cg6g020020	6.47685	36.5253	21.9846	32.6759	tryptophan synthase beta chain 2
Cg9g017250	44.9718	27.3933	18.4696	35.3972	cysteine-rich and transmembrane domain-containing protein A
Cg6g008930	56.9876	91.0749	94.9638	73.0377	40S ribosomal protein S8
Cg5g027850	17.6348	34.4361	25.696	44.11	probable fructokinase-4
Cg1g024060	317.386	56.281	48.2136	35.3361	trans-cinnamate 4-monooxygenase
Cg6g013830	114.119	46.39	48.8275	47.5261	Mal d 1-associated
Cg5g016170	95.7859	37.6178	38.2037	47.5424	ubiquitin carboxyl-terminal hydrolase 15 isoform X2
Cg5g028960	10.4382	45.1766	42.2493	55.817	transcription factor bHLH128
Cg4g008780	59.0826	109.024	104.866	95.6354	nucleosome assembly protein 1;2 isoform X1
Cg5g029590	141.726	31.479	22.078	43.2827	cinnamoyl-CoA reductase-like SNL6
Cg2g004890	25.593	83.9764	84.1185	73.4409	signal peptide peptidase
Cg7g015080	131.3	57.1432	45.6534	57.5302	phosphoenolpyruvate carboxylase 4
Cg5g011950	69.8777	36.7508	49.7542	39.8918	dof zinc finger protein DOF5.4
Cg6g018050	140.137	20.2638	18.9073	42.6536	senescence-associated protein AAF, chlorolplastic isoform X1
Cg6g017950	136.364	22.2351	29.9579	6.32336	aspartic proteinase PCS1
Cg8g003530	30.6798	124.616	118.949	115.61	---NA---
Cg5g040950	605.114	88.0085	62.5329	94.1662	hydroquinone glucosyltransferase
Cg2g045480	200.039	108.316	113.454	108.767	proline synthase co-transcribed bacterial homolog protein-like
Cg6g002980	118.41	62.8795	67.5601	80.989	thioredoxin-like protein AAED1, chloroplastic
Cg7g023630	176.995	83.6191	84.2543	98.9643	thioredoxin-like protein Clot
Cg2g016300	33.9685	103.857	84.2507	95.8143	2-alkenal reductase (NADP(+)-dependent)-like
Cg2g004490	567.952	15.2481	11.3146	31.886	serine--glyoxylate aminotransferase
Cg6g019490	62.6657	100.44	101.918	107.479	Alpha/beta-Hydrolases superfamily protein
Cg5g001570	74.8055	33.2002	23.9141	47.179	uncharacterized protein LOC102616011
Cg6g015000	92.8696	34.1947	32.0779	46.2393	protein trichome birefringence-like 8
Cg7g003400	39.417	82.9556	60.2544	82.5784	uroporphyrinogen decarboxylase
Cg3g001180	8.04645	46.9051	41.1055	49.0225	disease resistance protein At4g27190
Cg4g007320	125.65	49.8768	54.671	46.7471	heme oxygenase 1, chloroplastic
Cg4g007300	403.711	81.8679	60.8138	19.2393	SPX domain-containing protein 1-like
Cg4g006360	107.074	67.0258	69.932	77.5398	PITH domain-containing protein 1
Cg2g001350	62.2838	25.3009	14.7687	30.7881	formate--tetrahydrofolate ligase
Cg5g029250	132.648	42.4756	37.3839	55.4365	D-xylose-proton symporter-like 2
Cg6g018380	8.32717	47.5137	36.9108	37.0317	geranylgeranyl pyrophosphate synthase 7, chloroplastic-like
Cg7g006140	97.3209	52.588	40.4914	61.5611	methylesterase 1-like
Cg2g037710	22.8133	62.3016	51.048	34.8475	glycine cleavage system H protein 2, mitochondrial
Cg5g027340	27.4635	61.2815	57.8179	44.3147	peroxisomal and mitochondrial division factor 2-like
Cg2g018670	182.577	253.605	213.716	213.64	carboxymethylenebutenolidase homolog
Cg9g025930	99.7234	26.4912	14.941	32.444	carboxylesterase 1-like
Cg9g006030	141.367	176.184	170.939	177.625	40S ribosomal protein S3a
Cg2g012550	63.8128	100.809	85.1617	95.8328	glucose-6-phosphate 1-dehydrogenase, cytoplasmic isoform
Cg3g019200	86.3785	30.2943	44.2684	23.4614	uncharacterized oxidoreductase At4g09670
Cg4g006220	14.197	64.6148	61.1518	57.5601	coumarin 8-geranyltransferase 1b, chloroplastic
Cg4g012720	128.635	31.5611	37.7214	17.6434	ethylene-responsive transcription factor 3
Cg3g016700	125.647	76.0531	58.4934	84.7236	probable L-ascorbate peroxidase 6, chloroplastic/mitochondrial isoform X2
Cg2g025650	68.3105	17.2	13.4177	41.8336	uncharacterized protein LOC102624851
Cg7g001010	89.7227	65.2779	73.2509	65.3497	uncharacterized protein LOC18044233
Cg9g015220	76.253	32.8931	29.2396	31.5143	protein ECERIFERUM 26-like
Cg7g020980	11.7247	55.7841	58.8286	41.0171	---NA---
Cg5g033230	138.897	27.9688	28.2023	47.9753	photosystem II reaction center PSB28 protein, chloroplastic
Cg5g029030	282.941	61.5038	78.4126	65.0515	chitinase-like protein 1
Cg2g021250	135.708	16.0104	23.9584	13.4	DUF1218 domain-containing protein
Cg5g041020	29.5882	56.3226	66.1229	45.5112	jasmonic acid-amido synthetase JAR1-like
Cg8g019560	55.7177	36.3628	29.406	43.32	4-coumarate--CoA ligase-like 7
Cg5g041540	63.7366	16.1792	12.8319	39.8506	heavy metal-associated isoprenylated plant protein 39
Cg5g009750	6.81177	26.2456	22.6444	39.7936	BAG family molecular chaperone regulator 1
Cg9g016130	268.983	33.4347	39.8463	37.0575	protein LNK2 isoform X1
Cg3g013510	61.0845	29.4661	26.1808	43.2698	auxin-responsive protein IAA8-like
Cg5g015490	57.5013	20.5433	19.4732	35.3347	alpha,alpha-trehalose-phosphate synthase [UDP-forming] 1
Cg3g024710	99.2599	37.6177	29.389	50.1124	glutathione S-transferase-like
Cg2g041860	50.0438	28.6572	30.5003	30.0586	CBS domain-containing protein CBSX5-like
Cg3g004650	44.6757	85.5313	82.5502	75.1327	hypothetical protein CISIN_1g0336531mg
Cg9g026100	8.97464	41.9415	31.2988	30.2123	hydroxymethylglutaryl-CoA synthase-like
Cg5g018890	29.2107	107.801	98.0617	115.774	annexin D5-like
Cg8g020810	123.451	32.8946	33.6655	17.5932	Alpha/beta-Hydrolases superfamily protein
Cg9g028260	268.482	13.8717	25.2228	25.6604	RNA polymerase sigma factor sigE, chloroplastic/mitochondrial
Cg6g009850	142.335	112.158	101.987	126.644	macrophage migration inhibitory factor homolog isoform X2
Cg4g013430	7.65102	101.808	107.275	92.5829	cytochrome P450 71D11-like
Cg9g002050	4.0354	39.4861	34.2228	19.2325	topless-related protein 2
CgUng006000	116.133	57.7477	54.8695	51.6768	5'-methylthioadenosine/S-adenosylhomocysteine nucleosidase 1-like
Cg9g028650	53.9224	80.6486	84.3909	60.1563	glutamate synthase 1 [NADH], chloroplastic isoform X1
Cg8g021090	113.717	65.8703	60.0642	78.0255	omega-6 fatty acid desaturase, chloroplastic
Cg6g016340	87.9435	45.5217	39.5032	58.0241	peroxiredoxin-2E, chloroplastic
Cg8g021450	62.8739	30.3234	37.9354	25.9246	histone H4
Cg8g001710	133.071	174.937	154.233	147.041	ascorbate peroxidase
Cg5g005590	93.6494	17.3881	22.9043	1.67086	Octicosapeptide/Phox/Bem1p family protein
Cg4g003810	19.9497	43.5657	45.3116	35.8297	protein PEROXIN-4
Cg3g013110	255.965	33.9019	42.8117	42.4945	DUF3054 domain-containing
Cg9g008130	1.83974	32.5491	24.254	29.29	myb-like protein Myb15
Cg7g016920	56.4736	79.5905	87.3395	72.1104	ranBP2-type zinc finger protein At1g67325 isoform X1
Cg7g020680	23.7178	73.6617	63.224	55.4084	Methyltransferase PMT9
Cg1g028050	164.175	32.3215	36.2063	43.9261	protein ACTIVITY OF BC1 COMPLEX KINASE 8, chloroplastic
Cg3g024770	246.14	99.7579	106.777	82.3818	probable alpha-amylase 2
Cg7g012480	105.826	28.4284	26.6042	23.6761	4-hydroxyphenylpyruvate dioxygenase
Cg8g002560	85.9172	49.2423	46.0173	56.0873	hypothetical protein CICLE_v10029272mg
Cg6g012560	85.2635	35.8267	32.5507	47.2806	UBP1-associated protein 2C-like
Cg2g008940	45.2972	74.7809	76.3375	65.2459	probable endopeptidase p60
Cg5g008820	83.6624	63.0809	77.6851	63.5227	FAM10 family protein At4g22670
Cg1g009490	22.7024	49.3694	53.3766	36.8505	UPF0587 protein C1orf123
CgUng000600	107.849	71.8936	83.7345	78.2257	CAAX amino terminal protease
Cg2g000600	300.393	24.6562	30.6475	38.4718	protochlorophyllide-dependent translocon component 52, chloroplastic
Cg8g002270	42.4099	18.482	13.9681	31.1836	DUF21 domain-containing protein At2g14520-like
Cg4g015120	77.2831	12.6439	9.00263	23.0299	transcription factor MYBS3
Cg7g007930	58.2904	78.3056	78.5204	66.3187	mitochondrial import receptor subunit TOM7-1
Cg6g002030	68.278	88.423	83.7882	88.8588	V-type proton ATPase subunit G1-like
Cg2g046240	83.0109	27.6551	21.6982	36.5494	CASP-like protein 2B1
Cg2g045510	17.4887	51.3245	76.9214	50.0079	lysine-specific demethylase JMJ25 isoform X1
Cg6g008530	112.106	76.1297	84.4097	78.7265	protein DETOXIFICATION 21-like
Cg2g025980	103.093	42.0961	38.0733	55.604	nuclear protein
Cg7g023860	85.7378	27.4852	20.9101	32.0484	ecotropic viral integration site protein
Cg6g000400	54.5721	15.207	15.1095	27.1464	hydroquinone glucosyltransferase-like
Cg3g011790	108.865	95.9221	70.3929	89.4702	cysteine synthase
Cg7g022960	101.957	23.8091	25.7241	37.2791	cinnamoyl-CoA reductase 1-like
Cg5g044660	1.91997	30.9953	25.9654	19.2929	probable serine/threonine-protein kinase PBL19
Cg8g017590	86.2203	65.5058	43.4669	39.099	zinc finger A20 and AN1 domain-containing stress-associated protein 3-like
Cg6g001770	89.1997	27.2777	11.7846	21.3944	phenylalanine ammonia-lyase
Cg4g011150	163.283	23.3495	27.251	34.1562	uncharacterized protein LOC18053678
Cg5g042080	38.5408	62.9388	64.8477	57.4788	60S ribosomal protein L36-2-like
Cg7g011810	107.794	29.9929	33.1934	52.8279	probable pterin-4-alpha-carbinolamine dehydratase, chloroplastic
Cg2g009180	36.9876	66.3431	77.9641	65.7012	eukaryotic peptide chain release factor subunit 1-3
Cg1g006280	173.863	26.9697	22.129	35.3395	protein CONSERVED IN THE GREEN LINEAGE AND DIATOMS 27, chloroplastic isoform X1
Cg4g019450	51.1643	31.053	25.8034	29.3011	calmodulin-like protein 3
Cg4g006180	19.8229	43.4581	44.3931	32.6787	glutamate--tRNA ligase, cytoplasmic
Cg6g025810	43.4755	77.5169	71.1502	73.8257	protein RIK isoform X1
Cg6g023510	43.3201	16.0753	13.4257	25.9062	ABC transporter B family member 15-like
Cg7g006230	17.1902	40.9916	45.6714	32.629	Transmembrane protein 70, mitochondrial
Cg1g016390	54.9807	36.1907	39.8641	23.9916	Epoxide hydrolase-like protein
Cg1g007850	149.162	14.4061	21.1269	17.9424	unnamed product
Cg1g018980	97.2894	16.7087	19.1542	31.2349	Alpha/beta-Hydrolases superfamily protein isoform 1
Cg6g016080	119.253	47.2502	45.4375	32.152	tyrosine-protein phosphatase RLPH2-like
Cg7g011690	14.0268	36.2051	30.9946	43.1761	respiratory burst oxidase homolog protein C
Cg2g047100	1752.14	11.1821	22.8435	13.4961	ferric reduction oxidase 7, chloroplastic-like
Cg4g008400	29.0101	58.357	54.4466	56.1977	probable ADP-ribosylation factor GTPase-activating protein AGD14 isoform X1
Cg4g000900	62.7113	25.9135	35.0737	29.9781	uncharacterized protein At1g32220, chloroplastic
Cg2g024640	110.644	37.7556	43.941	34.3417	Inositol-1,4,5-trisphosphate 5-phosphatase 4 isoform 1
Cg2g000330	365.937	54.3501	53.2119	65.4577	protein MET1, chloroplastic
Cg5g011220	105.716	20.702	20.7154	33.6992	PLASMODESMATA CALLOSE-BINDING PROTEIN 3
Cg3g011000	23.9489	44.2827	62.6788	55.285	D-tagatose-1,6-bisphosphate aldolase subunit
Cg5g002580	249.258	22.3281	32.5249	34.0035	probable aquaporin PIP1-2
Cg8g024070	102.041	69.9548	70.3233	70.5425	nudC domain-containing protein 2
Cg3g012010	97.0985	18.8988	20.9907	28.3074	acyltransferase-like protein At1g54570, chloroplastic
Cg2g042560	89.8753	30.0414	26.854	29.268	protein DEHYDRATION-INDUCED 19 homolog 4-like
Cg4g006680	180.359	13.8248	17.4878	30.9408	putative GATA transcription factor 22
Cg8g007340	94.8604	16.2981	13.8067	36.3028	F-box family protein, putative isoform 1
Cg5g032930	68.1258	40.7375	43.6041	47.7609	transcription factor PIF1 isoform X1
Cg9g011670	62.0521	19.7451	20.6507	32.1117	Protein ABC1, mitochondrial precursor, putative
Cg3g002570	570.327	22.0476	32.4111	21.1378	ferredoxin, leaf L-A-like
Cg5g017910	82.9136	37.5554	27.3598	44.3845	elongation factor 2
Cg1g006570	11.365	37.7912	41.8322	29.4459	ruvB-like 2
Cg2g024750	3.71505	36.0868	31.7974	29.2683	putative disease resistance protein At5g05400
Cg5g015010	188.855	40.8107	27.3667	27.0612	geraniol 8-hydroxylase-like
Cg2g027520	311.426	40.66	26.2427	28.7849	ribonuclease 2
Cg7g012860	79.4308	51.3674	55.9439	40.9264	V-type proton ATPase subunit H-like
Cg6g002040	206.153	116.228	114.687	124.142	V-type proton ATPase subunit G
Cg4g006960	27.2602	49.2282	44.2236	36.0758	topless-related protein 4-like isoform X1
CgUng001210	147.863	10.8077	18.4773	6.4509	CASP-like protein
Cg1g009640	35.2552	13.8616	8.76481	24.2333	3-epi-6-deoxocathasterone 23-monooxygenase
Cg5g012590	46.302	79.6558	70.5318	63.8785	60S ribosomal protein L7-2
Cg5g008140	11.3506	55.1607	51.6023	56.9035	Hypothetical predicted protein
Cg8g025010	214.913	10.503	9.47949	27.7708	protein HIGH CHLOROPHYLL FLUORESCENCE PHENOTYPE 173, chloroplastic
Cg2g029210	38.712	67.6004	72.5367	56.6935	small nuclear ribonucleoprotein Sm D2-like
Cg5g037800	31.4986	79.9715	86.0859	67.0952	ethylene response sensor 1-like
Cg4g023840	78.3584	111.352	112.979	110.016	V-type proton ATPase subunit D
Cg6g019860	55.7414	84.4815	79.8162	71.9218	protein decapping 5
Cg4g013420	13.6631	140.377	138.707	123.315	cytochrome P450 71D11-like
Cg3g013330	40.0696	85.6539	83.2934	56.9834	inositol-tetrakisphosphate 1-kinase 2-like
Cg9g019710	9.21497	32.0844	20.9269	26.951	heparan-alpha-glucosaminide N-acetyltransferase
Cg3g013580	15.1475	44.5532	36.5291	44.6363	CBL-interacting serine/threonine-protein kinase 8 isoform X1
CgUng001680	27.2819	74.7047	65.646	73.8478	H/ACA ribonucleoprotein complex subunit 2-like protein
Cg2g036420	26.8438	69.8617	61.577	69.1393	protease 2-like isoform X1
Cg9g004340	187.302	41.0031	37.9886	51.7815	endo-1,3;1,4-beta-D-glucanase-like isoform X1
Cg9g016530	134.773	64.0225	63.7649	78.0261	mitochondrial fission 1 protein A
Cg9g007630	147.156	53.5904	50.2082	49.5714	uncharacterized protein At4g14450, chloroplastic
Cg7g018870	60.9592	13.457	18.6274	4.6058	Alpha/beta-Hydrolases superfamily protein isoform 4
Cg9g025710	94.0847	30.9536	16.1521	22.5975	embryo-specific protein ATS3B-like
Cg1g024200	12.8606	76.6237	57.7818	62.5289	probable glutathione S-transferase
Cg8g003400	131.497	59.4682	53.9268	64.6457	upstream activation factor subunit UAF30-like
Cg5g023630	98.789	8.01031	10.0169	19.2847	licodione synthase-like
Cg5g009760	29.7297	67.8457	63.7791	60.9245	lysophospholipid acyltransferase 1-like
Cg7g022830	35.3693	16.7647	10.9014	25.1568	#N/A
Cg4g017250	63.3417	98.9232	95.21	90.9315	uncharacterized WD repeat-containing protein C2A9.03-like
Cg4g007430	17.7579	51.3193	43.4938	41.3811	signal peptidase complex catalytic subunit SEC11A
Cg5g005760	19.8692	43.4905	48.6745	34.2683	50S ribosomal protein L19-1, chloroplastic-like isoform X1
Cg6g004430	15.5172	66.6307	67.8405	60.6329	organelle RRM domain-containing protein 2, mitochondrial
Cg7g012600	53.2696	17.5185	28.1383	12.294	Alpha/beta-Hydrolases superfamily protein
Cg5g006800	77.5785	100.206	93.3477	95.5078	UPF0235 protein At5g63440 isoform X2
Cg9g022890	17.7697	42.3085	45.2779	33.6094	ATP-dependent 6-phosphofructokinase 4, chloroplastic
Cg3g014430	148.434	48.9426	46.5532	57.475	pentatricopeptide repeat-containing protein At5g27460
Cg4g021960	110.378	63.417	62.8656	56.1355	NADH dehydrogenase [ubiquinone] 1 beta subcomplex subunit 2-like
Cg6g016700	45.701	84.9895	70.1831	71.2499	SUPPRESSOR OF ABI3-5 isoform X1
Cg5g031290	58.4595	31.4486	32.1791	34.2636	cytosolic copper/zinc-superoxide dismutase 3
Cg8g008120	28.1156	50.8084	36.3472	52.1299	purple acid phosphatase 2
Cg4g001090	65.9777	22.0787	23.6317	32.5097	protein TIC 55, chloroplastic
Cg2g046210	69.1687	40.8264	45.9906	36.4323	NADH-ubiquinone oxidoreductase 20.9 kDa subunit
Cg3g022120	28.9023	50.4364	43.7103	56.9204	exocyst complex component SEC3A
Cg1g019460	75.047	12.5528	15.5459	22.9207	probable aldo-keto reductase 2
Cg2g032620	79.6428	20.8151	19.6744	32.4967	protein SUPPRESSOR OF QUENCHING 1, chloroplastic
Cg5g035990	270.971	31.3359	44.6615	40.7691	uncharacterized protein LOC18048414
Cg2g020620	35.8532	50.7182	63.7303	47.355	glycoside hydrolase starch-binding domain-containing family protein
Cg6g017040	70.7381	102.694	98.9458	87.331	proteasome subunit alpha type-3
Cg5g019460	71.1039	36.3788	45.5072	34.8077	probable proteasome inhibitor
Cg2g033370	111.071	25.1577	22.2469	33.0555	Pectinesterase-1 precursor, putative
CgUng003800	109.889	35.2457	26.8848	22.7336	probable methyltransferase PMT24
Cg5g037370	4.89907	37.1378	40.9929	29.9197	peter Pan-like protein
Cg5g040510	33.5418	64.5113	67.2994	67.1305	---NA---
Cg4g014060	18.9782	42.9413	44.3974	30.6751	ER membrane protein complex subunit 8/9 homolog
Cg5g014890	50.532	16.6917	13.4067	23.6338	two-component response regulator-like APRR2 isoform X1
Cg5g010320	50.4692	31.1703	29.2035	37.9053	putative HNH endonuclease
Cg2g016290	160.11	50.9642	52.0297	36.8426	2-alkenal reductase (NADP(+)-dependent)
Cg3g023200	76.1688	45.8195	52.5717	43.6358	bZIP transcription factor 11-like
Cg1g013960	5.19315	24.0927	19.2534	18.2569	ABC transporter G family member 35-like
Cg4g001020	77.9438	11.4484	19.416	27.16	aspartyl protease family protein At5g10770-like
Cg2g046680	137.384	74.6911	76.0465	61.857	myb family transcription factor PHL7 isoform X1
Cg8g014190	44.6768	13.4667	24.5837	12.9563	transcription factor TCP13-like
Cg4g023790	7.44058	25.9437	29.7896	19.7549	Pre-rRNA-processing protein IPI3
Cg2g043560	32.635	53.9136	50.6398	45.3658	60S ribosomal protein L11
Cg2g028670	17.719	48.3907	45.7597	48.7856	protein BASIC PENTACYSTEINE2-like
Cg4g011800	9.16205	40.2704	49.471	33.4171	prostaglandin E synthase 2-like
Cg1g007210	93.7809	58.0032	59.2268	51.9124	malate dehydrogenase, glyoxysomal
Cg8g006000	34.5764	67.0439	61.3773	51.7427	mitochondrial import receptor subunit TOM6 homolog
Cg9g012500	60.6526	82.4493	84.9766	79.8408	60S ribosomal protein L13a-4-like
Cg2g038210	3.27326	25.5816	14.8873	22.9501	LOB domain-containing protein 4
Cg6g019760	164.892	32.0171	32.5016	49.0746	DUF2854 domain-containing protein
Cg9g007850	40.8724	7.95648	4.64724	30.777	WAT1-related protein At5g07050-like
Cg4g019660	35.0238	20.1517	18.8918	5.93998	Armadillo helical
Cg4g008260	75.2495	21.6361	24.3876	25.5156	nudix hydrolase 20, chloroplastic-like
Cg7g016400	67.2045	20.3552	29.1861	11.5332	PLASMODESMATA CALLOSE-BINDING PROTEIN 3
Cg5g033270	65.8206	43.0907	50.1777	42.675	Coa1 domain-containing protein
Cg8g013130	105.049	29.4543	29.9269	18.4603	probable CCR4-associated factor 1 homolog 11
Cg9g008490	20.0142	50.0713	44.6469	57.2807	glycolipid transfer protein 1
Cg2g029340	53.7419	20.4524	15.1476	30.4268	CRAL-TRIO domain-containing protein YKL091C
Cg3g000430	3.76756	31.8198	29.1697	32.1228	putative disease resistance protein RGA3
Cg9g001300	85.2316	13.702	14.8466	22.0357	protein high chlorophyll fluorescent 107
Cg5g040340	136.466	13.4628	14.2716	27.7297	ATP synthase delta chain, chloroplastic
Cg9g022790	10.2607	34.0406	17.8292	27.1511	ethylene-responsive transcription factor 2-like
Cg6g011380	15.6559	66.9756	68.7484	60.7024	DEAD-box ATP-dependent RNA helicase 53-like
Cg7g020890	66.0041	21.858	30.4447	29.0089	homeobox-leucine zipper family protein
Cg5g018210	9.57119	39.5335	44.9104	32.7164	pentatricopeptide repeat-containing protein At3g49240, mitochondrial-like
Cg5g008660	91.7945	35.8484	35.5747	53.0649	thylakoid lumenal protein TL20.3, chloroplastic isoform X1
Cg2g006280	40.1002	4.3762	4.39595	18.4411	potassium transporter 8-like
Cg5g022770	122.382	5.15721	9.2952	18.6828	zinc finger protein CONSTANS-LIKE 16-like
Cg7g022120	59.0104	93.216	85.979	88.2782	pyruvate dehydrogenase E1 component subunit beta-1, mitochondrial isoform X1
Cg9g000890	19.49	39.9881	42.4975	29.9408	ER membrane protein complex subunit 6-like
Cg8g010040	38.5685	22.268	21.8745	23.954	probable low-specificity L-threonine aldolase 1
Cg8g002250	13.4674	60.0543	44.6909	57.5161	LL-diaminopimelate aminotransferase, chloroplastic
Cg3g012990	7.21864	27.1859	21.633	18.7497	serine carboxypeptidase-like 17 isoform X3
Cg9g026060	70.5143	27.9952	36.4056	19.909	MADS-box protein SOC1
Cg7g014860	22.1103	46.7985	46.4523	38.1882	SUPPRESSOR OF GAMMA RESPONSE 1-like
Cg1g006120	58.7181	28.0784	33.7107	24.8484	metal transporter Nramp3
Cg2g036020	17.3927	27.4572	30.8712	37.6347	#N/A
Cg2g010060	1.23341	21.2719	13.2727	25.5423	acyltransferase-like protein At3g26840, chloroplastic isoform X1
Cg4g002350	151.701	79.3811	67.0875	71.8048	SPX domain-containing protein 1
Cg4g005420	22.7223	50.4516	55.3366	46.8264	hypothetical protein CUMW_186900
Cg6g014920	60.1435	26.4008	31.9248	19.1416	IAA-amino acid hydrolase ILR1-like 3
Cg5g016420	114.246	19.8979	19.3316	31.1866	peptide methionine sulfoxide reductase B1, chloroplastic
Cg1g024510	14.9286	40.9136	43.0064	34.5503	RNA polymerase II transcriptional coactivator KIWI
Cg2g041520	22.9378	80.8519	63.115	71.5807	uncharacterized protein LOC102620672 isoform X2
Cg5g044970	39.8592	94.2752	93.1533	98.423	3-hydroxyisobutyryl-CoA hydrolase 1-like
Cg3g021650	31.6004	85.931	91.7476	72.3051	26S proteasome non-ATPase regulatory subunit 14 homolog
Cg5g001470	113.52	24.5146	22.3884	15.8482	probable polygalacturonase
Cg9g006320	82.2333	6.95886	11.8362	6.92564	early light-induced protein 1, chloroplastic
Cg2g035340	6.0692	21.588	18.0036	26.5327	transcriptional activator DEMETER
Cg1g026450	48.8095	73.6824	73.3684	62.9918	26S proteasome non-ATPase regulatory subunit 12 homolog A
Cg6g007730	99.993	5.66588	16.6927	9.69338	DNA-binding protein SMUBP-2
Cg5g009670	19.5731	36.2804	39.2035	36.6324	DNA-directed RNA polymerase IV subunit 1 isoform X1
Cg1g014460	15.6849	31.9974	34.8213	24.8616	golgin candidate 5
Cg3g013390	171.545	15.5104	14.5285	12.3964	tubulin alpha chain
Cg3g016100	68.1449	17.2489	17.229	5.14347	fluoride export protein 2-like isoform X1
Cg9g028600	103.421	14.8793	20.7975	27.3513	spermine synthase
Cg1g021020	39.7497	54.3647	56.0435	49.4049	DCN1-like protein 4 isoform X1
Cg2g043390	34.7411	6.21663	10.5475	18.0394	phosphatidylinositol 4-phosphate 5-kinase MSS4-like protein
Cg3g005030	26.3497	93.8712	87.5076	81.6883	ETHYLENE INSENSITIVE 3-like 1 protein
Cg2g003320	6.44144	28.9057	24.6885	23.0633	xanthine dehydrogenase 1-like isoform X1
Cg7g014850	106.774	9.08815	13.0082	18.7491	serine/threonine-protein kinase STN7, chloroplastic
Cg6g018570	101.633	53.4399	63.9546	54.2185	U-box domain-containing protein 4
Cg6g011210	145.525	13.0497	15.4481	24.7186	hypothetical protein CISIN_1g032969mg
Cg8g004190	38.8325	8.35559	12.3498	2.61045	scopoletin glucosyltransferase
Cg6g019990	104.525	12.6922	10.5705	23.963	Glucose-repressible alcohol dehydrogenase transcriptional effector like
Cg3g006470	56.0318	35.8257	45.7233	30.7488	NADPH:quinone oxidoreductase
Cg9g029730	31.4309	48.8999	40.6958	52.3044	T-complex protein 1 subunit gamma
Cg9g028680	21.2154	58.7394	51.4229	53.4056	probable plastid-lipid-associated protein 14, chloroplastic
Cg1g001140	43.3397	92.4644	78.3742	77.4884	aconitate hydratase 1
Cg5g039160	38.9482	60.596	69.3631	48.5193	protein CAJ1-like isoform X13
Cg9g020940	26.5419	45.2531	42.3356	46.9552	villin-3-like isoform X1
Cg1g013810	25.5131	97.5842	96.8707	98.3989	nuclear poly(A) polymerase 4-like
Cg9g014050	53.7038	62.17	70.8188	64.2897	hypothetical protein CUMW_225040
Cg8g022760	69.8485	26.8456	37.049	27.956	E3 ubiquitin-protein ligase SDIR1-like
Cg5g008160	171.897	45.4446	45.7119	47.0989	WAT1-related protein At5g47470
Cg5g031170	30.025	46.5036	42.9869	38.3591	putative H/ACA ribonucleoprotein complex subunit 1-like protein 1
Cg6g013790	106.122	50.5976	46.1667	48.5537	E3 ubiquitin-protein ligase RHF2A-like
Cg2g005720	78.3877	41.7473	51.5615	41.8624	CBL-interacting protein kinase 32
Cg6g004970	102.373	23.383	25.0663	39.6094	light-harvesting complex-like protein OHP1, chloroplastic
Cg7g017790	48.564	26.7301	26.0553	33.7105	cytochrome P450 71A1
Cg8g004020	36.0326	24.9811	17.3016	23.68	kynurenine formamidase
Cg4g013160	61.3231	27.2753	32.5897	38.2722	heterogeneous nuclear ribonucleoprotein 1
Cg9g000780	54.0322	17.1831	19.7304	12.4747	beta-glucosidase-like SFR2, chloroplastic isoform X2
Cg4g002940	40.5815	16.7152	23.4114	23.6284	6-hydroxynicotinate 3-monooxygenase
Cg1g006270	113.755	18.2184	17.232	24.5562	Chaperone DnaJ-domain superfamily protein, putative isoform 1
Cg4g005990	52.7972	19.2282	22.2249	23.3581	mitogen-activated protein kinase kinase kinase 1-like
Cg7g021860	37.3668	21.0466	28.7888	15.1225	26S proteasome non-ATPase regulatory subunit 10
Cg8g010350	29.1388	56.892	49.3025	57.3806	1-aminocyclopropane-1-carboxylate oxidase homolog 1-like isoform X1
Cg4g018090	59.8376	17.7238	25.282	10.3079	phosphoinositide phosphatase SAC3
Cg8g024290	29.5532	45.9864	51.8999	39.5752	PHD finger-like domain-containing protein 5B
Cg6g006050	9.86714	35.381	33.2109	25.8321	protein SSUH2 homolog
Cg9g006080	6.13653	31.0536	31.3553	22.5678	WEB family protein At5g55860
Cg9g006160	70.6718	14.7834	12.6472	22.2229	VAN3-binding protein isoform X2
Cg2g018500	46.1197	18.7929	19.9783	28.8987	membrane metalloprotease ARASP, chloroplastic
Cg4g023480	85.4416	7.06143	13.5578	9.9217	alanine and glycine-rich protein
Cg7g013670	89.5289	28.223	18.37	38.1276	glutamine synthetase nodule isozyme
Cg6g014570	19.5963	59.0081	61.6459	58.7658	ribosome biogenesis protein NSA2 homolog
Cg4g013140	21.4178	88.1115	79.2121	77.6632	Calcium-dependent lipid-binding family protein isoform 1
Cg8g024630	57.1444	97.1062	89.4999	87.0656	40S ribosomal protein S4-3
Cg5g011480	43.7169	20.0043	17.5686	9.22824	glycerophosphodiester phosphodiesterase GDPD6
Cg4g019590	84.7421	30.4731	28.9122	34.6749	sucrose phosphate synthase
Cg1g025810	17.567	33.8349	36.5657	27.9249	UPF0235 protein C15orf40 homolog
Cg3g023210	37.1589	57.9139	55.6652	52.7925	protein TIC 20-I, chloroplastic
Cg9g014540	24.0585	50.1618	51.9646	43.332	---NA---
Cg5g032000	200.896	18.8604	19.0261	24.0138	chloroplast envelope quinone oxidoreductase homolog
Cg4g024930	68.0231	27.8913	27.5927	39.7776	uncharacterized methyltransferase At2g41040, chloroplastic
Cg5g016270	17.2549	35.5346	39.7438	39.584	hypothetical protein CUMW_167530
Cg1g017530	27.7595	49.4644	46.2059	47.4199	hypothetical protein CISIN_1g030349mg
Cg2g027970	101.428	25.8372	17.1119	20.0153	serine carboxypeptidase-like 20
Cg1g005870	42.596	9.56147	12.7426	25.7056	ADP-ribosylation factor 1
Cg7g005640	77.9803	8.41167	7.51588	17.76	Chlorophyll A-B binding protein
Cg7g003470	450.893	10.1682	15.5565	27.1389	putative GATA-type transcription activator
Cg5g003920	111.914	15.0436	17.2811	8.57121	Dynein light chain type 1 family protein, putative isoform 2
Cg6g016130	122.356	33.3699	37.7307	36.441	reticulocyte-binding protein 2 homolog a
Cg2g014910	18.451	34.9574	36.3254	28.3104	hypothetical protein CISIN_1g039616mg
Cg6g024850	44.8994	65.3562	69.0103	56.1209	39S ribosomal protein L41-A, mitochondrial
Cg7g016710	46.1788	11.5814	9.62626	16.7609	suppressor protein SRP40 isoform X1
Cg3g003890	8.37089	24.7506	14.5789	22.4425	uracil-DNA glycosylase
CgUng000710	190.956	12.3313	20.1819	5.52752	mitochondrial carnitine/acylcarnitine carrier-like protein
Cg5g044130	12.212	40.1746	46.4581	37.6343	His_Phos_1 domain-containing protein
Cg2g023170	59.8425	8.19423	15.4844	10.3483	21.7 kDa class VI heat shock protein
Cg3g014040	69.066	15.1938	16.9191	26.1966	MADS-box protein SVP-like
Cg2g045690	79.3036	31.1015	33.61	19.8848	1-aminocyclopropane-1-carboxylate oxidase
Cg5g035070	18.982	40.8848	44.4192	42.2787	protein NETWORKED 1D-like
Cg5g040600	40.214	7.54682	6.7608	17.7034	ethylene-responsive transcription factor ERF023
Cg7g023930	172.046	29.9428	27.0413	22.4783	Calcium-binding EF-hand family protein
Cg3g021510	50.9171	9.9761	7.27637	20.5333	BRI1 kinase inhibitor 1-like
Cg4g022900	44.5126	70.3537	76.666	73.718	phospholipase D beta 2-like
Cg9g024010	406.973	27.1116	20.4869	2.2076	putative glycerol-3-phosphate transporter 1
Cg2g041800	9.7841	30.4297	33.5131	27.8651	putative serine/threonine-protein kinase
Cg6g003860	8.04001	49.7467	51.1526	41.1848	protein SLOW GREEN 1, chloroplastic-like
Cg8g000060	194.756	15.933	13.1057	24.3629	putative LOV domain-containing protein
Cg5g002860	40.9149	13.1851	10.4416	19.7764	O-glucosyltransferase rumi homolog
Cg5g036000	7.00682	49.9947	50.74	50.4351	elongation factor Tu, mitochondrial
Cg8g000360	25.4253	37.7653	44.489	38.525	alpha-1,3-mannosyl-glycoprotein 2-beta-N-acetylglucosaminyltransferase
Cg1g029530	16.3293	34.9085	34.2279	25.5823	CMP-sialic acid transporter 5
Cg8g022700	37.7252	52.0877	46.1229	56.1933	ATP-dependent zinc metalloprotease FTSH 10, mitochondrial-like
Cg2g040740	60.5411	8.4822	8.3167	23.4186	transcription factor ILR3
Cg2g019650	17.8979	46.0779	51.9845	35.8995	BTB/POZ domain-containing protein At2g04740
Cg9g026850	44.5978	10.8066	6.55778	11.9181	oxalate--CoA ligase
Cg4g004360	78.299	14.4714	12.8672	5.66146	monoglyceride lipase-like
Cg2g020580	86.5061	35.6837	32.8881	34.2632	long chain acyl-CoA synthetase 8
Cg7g002050	43.372	31.1289	20.5488	26.9743	zinc finger CCCH domain-containing protein 29-like
Cg4g004400	30.6356	45.115	50.578	44.6278	casein kinase 1-like protein HD16
Cg1g019680	1.63055	22.03	17.4081	18.3459	RING-H2 finger protein ATL54-like
Cg5g005080	127.117	12.3816	12.3544	22.5021	Protein ApaG
Cg6g000370	25.5416	43.8896	46.9885	35.8421	transmembrane protein 208 homolog
Cg5g036820	107.053	78.6495	86.6252	81.4249	spermatogenesis-associated protein 20 isoform X1
Cg5g003340	52.279	26.8492	27.6511	37.362	Ubiquitin-conjugating enzyme E2 2
Cg6g013760	98.107	37.6956	35.7301	44.7067	sucrose-phosphatase 2
Cg3g014320	59.947	25.7871	30.7363	22.1872	zinc-finger homeodomain protein 2
Cg8g008850	156.11	88.9428	94.9618	84.0642	V-type proton ATPase 16 kDa proteolipid subunit
Cg2g037720	55.0325	88.3038	74.098	74.5146	eukaryotic translation initiation factor 2 subunit beta-like
Cg2g016110	19.2724	42.203	40.6402	46.3412	ankyrin repeat-containing protein At5g02620-like
Cg7g011990	26.143	42.5774	39.6835	37.4245	60S ribosomal protein L6-1-like
Cg5g006330	116.201	8.71392	10.3118	19.8923	GDSL esterase/lipase At3g48460
Cg2g044520	25.7329	38.928	38.1761	46.3039	transcription factor bHLH144
Cg5g034620	65.1238	70.7912	74.5226	66.2874	NADH dehydrogenase [ubiquinone] flavoprotein 2, mitochondrial
Cg8g004290	118.897	28.7644	20.999	17.893	O-acyltransferase WSD1-like isoform X1
Cg9g000650	155.116	57.5008	49.9785	61.0261	dihydrolipoyl dehydrogenase 1, mitochondrial
Cg2g037110	11.0738	28.9208	20.586	28.3891	mitochondrial amidoxime reducing component 2
Cg2g011560	63.6546	23.8501	29.7983	21.6533	TLC domain-containing protein At5g14285
Cg8g022770	46.1192	28.0789	29.9073	15.8057	E3 ubiquitin-protein ligase RDUF2-like
Cg5g004570	78.0993	20.7277	18.5717	35.9274	Thiol-disulfide oxidoreductase DCC isoform 2
Cg2g003710	13.5246	34.5298	27.1137	25.6556	phospholipase A1-Igamma3, chloroplastic
Cg9g017380	12.7705	30.9113	32.4747	20.7328	H/ACA ribonucleoprotein complex subunit 4
Cg8g013930	22.7455	35.1135	42.409	28.0443	40S ribosomal protein S25-like
Cg7g015440	28.9886	11.8087	14.7187	19.8785	serotonin N-acetyltransferase 2, chloroplastic
CgUng001480	15.8396	40.011	46.3152	31.742	uncharacterized protein LOC18056079
Cg1g003730	31.5966	62.6926	53.0428	67.3491	probable Xaa-Pro aminopeptidase P
Cg5g011190	33.5209	5.53301	3.30813	16.3082	flavonoid 3'-monooxygenase
Cg6g015120	50.4571	15.1877	19.6024	10.8901	probable protein kinase DDB_G0277539
Cg6g012140	107.447	21.8802	19.5305	30.3012	anthocyanidin 3-O-glucosyltransferase 2-like
Cg5g022530	30.3634	55.0793	52.9583	47.4421	40S ribosomal protein S7
Cg4g019650	69.5302	44.31	49.8361	39.9442	bifunctional purple acid phosphatase 26
Cg5g041940	166.46	15.323	13.064	17.7119	probable glycerol-3-phosphate acyltransferase 8
Cg5g039760	18.6082	41.6842	43.4981	31.7052	ribosome production factor 1
Cg3g016830	52.7258	30.3351	36.8043	24.9762	SWI/SNF complex subunit SWI3C
Cg2g027210	78.9966	13.2473	17.7441	19.4809	hypothetical protein CISIN_1g029104mg
Cg5g034720	48.5451	21.3205	25.8808	15.8031	hypothetical protein CUMW_166680
Cg4g015370	11.0725	32.8168	26.7323	21.4822	DNA repair RAD52-like protein 1, mitochondrial
Cg7g014020	118.649	55.4948	61.4444	57.8861	transcription factor TCP7-like
Cg2g013730	26.4262	52.8618	55.9157	44.1689	putative ubiquitin-conjugating enzyme E2 38 isoform X1
Cg5g043840	137.319	12.6821	8.95451	23.3016	transcription factor UNE10
Cg4g019260	58.9795	38.0489	32.9817	38.8372	probable protein phosphatase 2C 53
Cg6g007280	32.8247	17.558	16.5639	22.7275	uncharacterized protein LOC102618883 isoform X1
Cg5g011550	68.6586	91.4123	81.9594	80.6285	ras GTPase-activating protein-binding protein 2-like
Cg7g006680	75.5492	12.68	16.6378	6.077	GATA transcription factor 8
Cg7g004910	17.1498	37.7002	32.9567	32.5048	Hexose transporter HXT14
Cg9g029700	36.8469	7.51733	6.88591	14.6416	ABC transporter D family member 2, chloroplastic
Cg2g043480	84.1096	44.5699	39.5673	32.6633	CBL-interacting serine/threonine-protein kinase 12-like
Cg6g018720	19.1895	48.1846	44.8336	42.038	pyridoxal kinase isoform X2
Cg3g005570	72.9502	16.4822	20.7759	25.083	patatin-like phospholipase domain-containing protein 2
Cg4g020620	70.0397	38.9341	41.3617	39.263	neuronal acetylcholine receptor subunit alpha
Cg7g020650	12.2621	32.7497	38.2632	25.3355	heat-inducible transcription repressor
Cg2g028870	91.096	21.1354	17.9397	17.1239	Oxidoreductase, putative isoform 1
Cg7g021920	108.68	44.7618	49.4215	35.8203	probable inactive purple acid phosphatase 2
Cg6g005740	31.0719	26.1747	22.5656	22.9967	universal stress protein PHOS32
Cg5g010840	93.9554	42.9655	32.5211	25.0616	uncharacterized protein LOC102609761
Cg6g017290	33.7694	13.9316	18.9357	10.8823	E3 ubiquitin-protein ligase At4g11680-like isoform X1
Cg8g002280	52.9844	35.813	31.9622	42.8068	probable pectin methylesterase CGR2
Cg8g004480	6.80926	30.8226	29.105	19.9777	thioredoxin M3, chloroplastic
Cg3g002630	116.946	29.1959	31.6333	23.4242	T-complex 11
Cg8g019490	65.5834	116.527	104.157	103.217	lactoylglutathione lyase isoform X1
Cg7g014780	290.468	22.2836	11.8287	5.32888	transcription factor HHO3
Cg6g011630	23.6798	43.3839	44.1652	34.0898	hypothetical protein CUMW_002390
Cg6g016860	35.3599	69.4883	70.5248	60.271	UBP1-associated protein 2A
Cg2g012560	18.1953	70.0221	71.3404	71.1181	plant UBX domain-containing protein 1
Cg9g025380	33.7825	5.62482	8.37567	13.4564	protein EXORDIUM-like 3
Cg5g034910	99.8253	9.30868	12.5912	9.01767	heat stress transcription factor A-7a-like
Cg1g015670	19.1263	50.2151	51.5988	40.1786	probable LRR receptor-like serine/threonine-protein kinase At3g47570
Cg5g023200	21.5537	52.8658	56.994	39.7599	cysteine protease ATG4-like isoform X1
Cg5g000710	29.6564	45.5348	43.8317	41.3112	serine/threonine-protein kinase WNK8-like
Cg4g024720	19.5134	57.5155	53.0685	64.6942	protein ENHANCED DISEASE RESISTANCE 2-like isoform X1
Cg2g000820	7.26798	19.747	23.1225	16.1261	Lipase/lipooxygenase, putative isoform 3
Cg3g001190	11.9962	39.8372	38.1451	50.4228	probable disease resistance protein At4g27220 isoform X1
Cg8g023120	12.5111	34.6714	42.0598	27.4177	WEB family protein At3g02930, chloroplastic
Cg7g003710	77.5335	11.4579	6.58494	16.5977	probable chalcone--flavonone isomerase 3
Cg5g034900	159.022	11.3113	14.4033	14.8454	---NA---
Cg6g017730	13.7875	31.15	34.2749	28.484	ruvB-like protein 1
Cg6g016250	25.8112	47.6484	58.5118	41.3512	polyadenylation and cleavage factor homolog 4 isoform X1
Cg1g016860	52.6429	12.1426	5.82164	22.3279	acyl-protein thioesterase 2 isoform X1
Cg1g008630	32.7244	48.4526	48.4121	47.8738	hypothetical protein CICLE_v10025459mg
Cg1g011570	12.2431	26.2147	32.4433	22.5338	protein CHROMATIN REMODELING 19
Cg5g003440	38.5989	17.6957	25.2203	10.7495	mitochondrial outer membrane protein porin of 36 kDa-like
Cg1g020160	14.8809	59.788	59.0147	58.7985	3-isopropylmalate dehydrogenase 2, chloroplastic
Cg1g013370	56.8674	82.2488	79.2712	78.2965	26S protease regulatory subunit 7A
Cg5g000220	50.0546	6.14761	6.5419	16.806	subtilisin-like protease SBT3.5
Cg3g015450	65.0539	46.6249	42.1592	42.4158	zinc finger CCCH domain-containing protein 15 homolog
Cg1g017430	142.903	12.632	18.3774	9.1165	embryo-specific protein ATS3B-like
Cg7g014610	43.9219	7.16137	7.84461	16.7969	nuclear transport factor
Cg3g003930	64.3815	79.819	75.9894	85.824	protein RETICULATA-RELATED 1, chloroplastic
Cg8g020580	10.1729	24.5206	19.635	24.6269	hypothetical protein CUMW_035810
Cg5g026090	3.90113	24.0304	26.3809	16.7486	protein FAM136A-like
Cg9g026840	42.2431	9.61776	11.127	5.84136	tubulin beta-1 chain
Cg6g014550	143.953	32.0653	34.3559	21.842	digalactosyldiacylglycerol synthase 1, chloroplastic
Cg6g005680	36.7688	0.968695	3.26915	9.83515	putative lipid-transfer protein DIR1
Cg4g008420	48.7337	9.07729	10.377	5.09848	leucine-rich repeat extensin-like protein 4
Cg5g043580	40.5607	30.5448	24.7175	18.3269	auxin-responsive protein SAUR36
Cg2g000070	42.4989	57.3586	50.6168	48.766	ketol-acid reductoisomerase, chloroplastic
Cg7g010190	39.2497	19.9621	20.6362	27.0727	thylakoid lumenal 17.9 kDa protein, chloroplastic
Cg5g036460	7.07173	23.4666	26.0891	16.1781	protein SLOW WALKER 1
Cg2g019240	65.7238	11.7396	11.8371	20.0743	E3 ubiquitin-protein ligase COP1-like
Cg2g036890	57.95	35.558	35.521	42.2757	ycf3-interacting protein 1, chloroplastic
Cg9g012770	57.6767	77.979	76.9905	72.7097	Type 1 membrane protein, putative isoform 1
Cg3g016580	77.3895	9.65825	23.7076	14.8365	chlorophyllide a oxygenase, chloroplastic
Cg5g033110	19.3777	34.2361	36.3901	26.8725	WD40 domain-containing protein
Cg1g000830	31.8029	13.4979	11.1106	21.2544	protein DETOXIFICATION 45, chloroplastic isoform X1
Cg3g002670	39.9672	8.44173	7.33998	18.0435	potassium channel AKT2/3
Cg9g016310	301.692	17.8322	15.0384	12.046	haloacid dehalogenase-like hydrolase domain-containing protein 3
CgUng001790	36.8858	74.7888	73.8026	69.0891	protein CHAPERONE-LIKE PROTEIN OF POR1, chloroplastic
Cg2g035830	21.7525	45.1205	40.6925	51.1746	Coproporphyrinogen-III oxidase, aerobic
Cg6g025500	34.6971	56.99	52.7508	56.7456	probable ubiquitin conjugation factor E4
Cg5g027370	9.35248	25.9154	26.9558	19.3829	ribosomal L1 domain-containing protein 1
Cg7g019560	93.421	57.7202	53.1966	54.0393	Spermidine synthase
Cg5g035970	46.5	57.3467	60.9182	57.7384	sm-like protein LSM2
Cg1g004150	110.02	97.2784	96.0203	91.1536	succinate dehydrogenase [ubiquinone] flavoprotein subunit 1, mitochondrial
Cg2g040980	118.601	27.8447	30.6218	20.4159	U-box domain-containing protein 8
Cg9g028270	197.037	8.35662	14.7576	14.0252	transcription factor CPC-like
Cg8g024000	102.386	11.0395	13.7174	10.1744	RING/U-box superfamily protein isoform 2
Cg5g035570	53.4308	37.6488	45.5402	37.4564	mitochondrial Rho GTPase 2 isoform X1
Cg8g022780	20.8406	50.2076	51.2403	42.697	pumilio homolog 2-like
Cg2g018720	176.981	9.20602	5.11914	15.8018	cellulose synthase-like protein B4
Cg2g002440	9.15541	19.6259	24.3314	16.5977	flavonoid 3'-monooxygenase
Cg5g032690	83.6872	5.27961	4.95484	12.1675	uncharacterized protein LOC102628841
Cg2g037030	31.2412	46.8082	47.6083	45.1604	uncharacterized protein LOC102611829 isoform X1
Cg9g007180	51.256	17.8122	14.286	23.6533	#N/A
Cg2g021840	65.3133	26.9862	20.5491	16.2266	cyclic nucleotide-gated ion channel 4
Cg4g009220	28.8968	13.6113	12.9413	20.7556	uncharacterized protein LOC102627547 isoform X2
Cg3g009920	44.5371	20.2181	20.8325	13.5572	protein NUCLEAR FUSION DEFECTIVE 4
Cg8g022600	25.0343	42.8276	36.8721	39.3802	telomere repeat-binding protein 5 isoform X1
Cg9g014450	22.5932	5.73366	5.16551	14.1491	protein RALF-like 32
Cg4g003820	46.3723	26.4869	28.5277	19.0183	Abhydrolase_6 domain-containing protein
Cg3g008900	44.98	8.27848	5.13142	13.2136	UDP-glycosyltransferase 83A1-like
Cg5g016030	21.7937	54.2356	60.7718	55.3715	60S ribosomal protein L18a
Cg9g015030	24.3734	7.40113	4.02032	13.0954	non-functional NADPH-dependent codeinone reductase 2-like
Cg9g026450	50.5457	37.2447	33.8553	44.0425	protein IQ-DOMAIN 14
Cg8g023510	18.2391	37.8549	38.7722	32.5893	DNA-directed RNA polymerases I and III subunit RPAC2-like
Cg1g010510	19.1895	39.455	39.7021	30.0359	E3 ubiquitin-protein ligase SPL2
Cg4g004560	23.1125	42.0832	35.5661	40.2804	nuclear poly(A) polymerase 4-like isoform X2
Cg2g025360	29.4374	15.308	13.5942	21.7744	hypothetical protein CISIN_1g012942mg
Cg9g028400	36.7501	26.9083	22.337	28.7099	probable protein phosphatase 2C 76
Cg9g013620	125.022	23.2735	21.3165	8.58499	putative mitochondrial protein
Cg5g044000	17.9629	51.2003	50.9336	48.363	elongation factor G-1, mitochondrial
Cg3g013750	28.898	78.7941	71.5182	71.2803	transcription initiation factor IIA subunit 2
Cg2g022870	42.9142	10.1325	7.83253	1.81078	(-)-germacrene D synthase-like
Cg5g041710	16.2702	32.1057	33.5856	26.0968	RAB6A-GEF complex partner protein 1
Cg5g038790	62.2908	9.65132	11.8259	14.2562	uncharacterized protein LOC18049950
Cg5g031550	18.496	37.4947	39.9783	29.9335	nucleolar MIF4G domain-containing protein 1
Cg2g019750	35.525	11.1617	14.6329	18.1354	hypothetical protein CICLE_v10017035mg
Cg5g000590	54.9655	5.04845	6.19328	15.1393	metal-nicotianamine transporter YSL1
Cg9g011050	14.7496	43.713	47.1299	34.4483	glycosyltransferase-like KOBITO 1
Cg5g031380	68.4648	27.6352	18.1225	11.0911	DNA ligase 1
CgUng000940	30.2679	48.3946	50.5084	38.4481	syntaxin-22-like isoform X2
Cg7g017820	47.7135	7.45123	6.8332	15.8388	two-component response regulator ARR11 isoform X1
Cg2g035210	13.5703	26.4134	24.4052	31.4912	Phosphatase 2C 66 isoform 1
Cg6g018280	85.9384	38.5147	39.6155	33.7678	nudix hydrolase 18, mitochondrial-like
Cg1g012580	41.202	26.4312	22.3751	31.6531	transcription factor bHLH68
Cg8g018350	17.6117	35.6705	37.7377	39.0334	AP-2 complex subunit alpha-1-like
Cg6g000380	64.7603	16.0438	15.6744	8.71459	hydroquinone glucosyltransferase-like
Cg2g032010	52.9057	21.7966	20.9846	15.7127	probable protein phosphatase 2C 34
Cg5g037340	94.9678	75.6391	74.1229	74.6718	serine/arginine-rich-splicing factor SR34-like
Cg3g013040	113.58	8.61709	9.14526	18.3727	lecithin-cholesterol acyltransferase-like 1
Cg6g025530	43.5933	21.9057	25.3008	18.2526	probable mitochondrial saccharopine dehydrogenase-like oxidoreductase At5g39410
Cg8g013920	62.6592	52.1268	53.5682	52.2654	copper ion binding protein
Cg3g018300	34.4341	65.6739	68.5921	58.1722	eukaryotic translation initiation factor 5B
Cg7g016840	89.6336	177.22	166.136	175.364	nuclear transport factor 2B
Cg9g000770	78.3415	5.72958	4.56567	13.2438	hypothetical protein CICLE_v10006399mg
Cg3g025210	41.4259	59.3718	57.8705	50.7057	small nuclear ribonucleoprotein SmD3b
Cg7g016460	36.3036	15.0971	10.1108	13.6719	cytochrome P450 78A5-like
Cg1g007890	28.1771	10.2035	8.7872	15.3751	O-fucosyltransferase 39
Cg5g037270	7.83715	27.1202	27.0923	21.7451	nucleolar protein 16
Cg2g001060	56.7492	9.08887	9.45166	4.82066	dirigent protein 22-like
Cg4g007200	35.2733	19.7639	24.4756	22.8583	CBL-interacting serine/threonine-protein kinase 24 isoform X1
Cg5g003640	63.2541	12.1858	15.014	5.80603	pentatricopeptide repeat-containing protein At1g74750-like
Cg1g008550	52.1487	20.1654	15.7482	28.5035	haloacid dehalogenase-like hydrolase domain-containing protein At4g39970
Cg3g013930	146.407	21.0528	18.1484	16.5919	protein ECERIFERUM 2
Cg2g044440	53.5276	5.049	15.3522	3.91857	chlorophyll a-b binding protein of LHCII type 1
Cg5g007800	5.52536	20.0309	16.2152	14.5452	RING-H2 finger protein ATL22-like
Cg8g024760	81.6483	9.85767	10.2703	13.5969	shewanella-like protein phosphatase 1
Cg8g024610	29.326	45.4368	47.1791	36.295	ubiquitin-activating enzyme E1 1 isoform X2
Cg8g023530	9.96501	22.8839	24.8583	17.5213	hypothetical protein CISIN_1g031513mg
Cg6g001090	129.725	33.9271	39.8629	35.1192	zinc finger CCCH domain-containing protein ZFN-like
Cg9g026370	75.3804	22.609	28.1078	20.6362	BAG family molecular chaperone regulator 1
Cg2g040180	3.89092	18.2786	18.831	11.5634	cardiolipin synthase (CMP-forming), mitochondrial
Cg6g013940	69.9892	24.1822	23.3024	26.7301	putative phosphatidylglycerol/phosphatidylinositol transfer protein DDB_G0282179
Cg4g004700	20.8681	39.4861	39.7456	36.181	clathrin interactor EPSIN 1
Cg2g027570	14.5519	33.0019	29.4639	25.9164	acyl-coenzyme A thioesterase 9, mitochondrial-like
CgUng005500	43.858	19.7922	17.4406	26.6741	probable ribosome-binding factor A, chloroplastic
Cg2g014680	5.37233	22.6474	21.3125	16.8143	H/ACA ribonucleoprotein complex non-core subunit NAF1-like
Cg1g004340	34.1449	21.1035	13.2367	26.7733	zinc-finger homeodomain protein 6
Cg7g007000	6.37587	20.0497	22.5119	14.1156	thioredoxin-like 3-2, chloroplastic isoform X1
Cg4g012410	35.6668	52.8435	52.3857	47.7304	syntaxin-61
Cg1g028670	29.287	12.2555	12.393	18.7359	ribonucleoside-diphosphate reductase small chain
Cg6g013270	41.3696	60.8231	69.8477	59.1161	carbon catabolite repressor protein 4 homolog 1
Cg4g011480	5.7951	18.9643	20.425	14.5238	kinetochore protein NDC80 homolog
Cg5g036430	23.6711	40.9913	37.4882	32.2863	serine/threonine-protein phosphatase BSL1 isoform X1
Cg5g032400	79.3083	9.32433	6.82677	12.1021	cilia- and flagella-associated protein 91 isoform X2
Cg9g000230	14.4034	39.0305	36.7618	36.6298	50S ribosomal protein L3-2, chloroplastic
Cg2g008060	27.9605	4.76489	8.24793	12.9866	transcription activator GLK1
Cg7g003300	214.121	11.0899	2.23718	13.5754	protein NRT1/ PTR FAMILY 5.1-like
Cg6g025580	35.3999	14.6048	15.8232	13.7393	lamin-like protein
Cg8g004280	89.2179	31.4498	22.0968	22.9627	O-acyltransferase WSD1-like
Cg9g010300	22.9944	5.22148	6.20554	11.4172	Fungal lipase-like
Cg7g022880	20.0973	9.39464	7.31379	12.4691	protein PNS1 isoform X2
Cg7g018610	21.347	41.423	38.2109	31.2104	plant intracellular Ras-group-related LRR protein 3
Cg7g012170	57.0258	22.9494	31.8602	17.5133	probable polyamine oxidase 2
Cg6g019090	15.6103	35.2682	36.9566	27.806	protein DETOXIFICATION 14-like
Cg4g023010	144.24	9.71429	18.4065	7.12282	transmembrane protein, putative
Cg8g020820	14.1846	28.4459	28.0905	21.7025	probable E3 ubiquitin-protein ligase rbrA isoform X2
Cg8g007040	25.8851	9.23747	7.05403	16.8926	transcription factor bHLH63
Cg3g018340	104.309	86.8094	93.8294	87.5024	sm-like protein LSM3B
Cg3g015260	47.7013	14.4583	15.4655	21.1903	probable beta-D-xylosidase 7
Cg8g006830	36.5481	54.6408	53.3069	56.0268	NADH dehydrogenase [ubiquinone] iron-sulfur protein 8-B, mitochondrial
Cg7g004240	15.1034	29.5926	28.6517	22.2355	very-long-chain enoyl-CoA reductase
Cg7g013290	106.113	33.8924	40.656	33.6168	ATP-dependent Clp protease adapter protein CLPS1, chloroplastic-like
Cg8g020780	10.7379	32.8837	30.254	34.9521	adenylate kinase isoenzyme 6 homolog
Cg2g017760	31.2475	14.3994	9.67832	14.6354	beta-amylase
Cg5g044750	31.1519	45.0619	41.4155	45.0757	acyl carrier protein 1, mitochondrial
Cg3g020720	33.7125	11.7014	10.807	16.8748	transcription factor bHLH81 isoform X1
Cg4g004790	10.7729	23.5852	26.5948	16.6243	AAC-rich mRNA clone AAC11 protein-like isoform X1
Cg9g003890	48.485	11.4088	10.2015	15.3498	PH-response transcription factor pacC/RIM101 isoform 1
Cg1g014880	24.1615	37.1083	39.5561	30.6248	nitrate regulatory gene2 protein
Cg9g024210	51.9936	39.3627	43.6178	46.5253	potassium channel SKOR
Cg5g043000	7.77254	22.2497	23.0243	17.6225	glyoxylate/hydroxypyruvate reductase HPR3-like
Cg4g006750	69.3557	20.4576	22.5079	25.658	adenylate cyclase, terminal-differentiation specific
Cg6g010460	58.2054	32.4538	39.1989	34.0241	serine/threonine-protein kinase HT1-like
Cg5g023730	22.7591	37.5487	37.456	29.9491	protein TRIGALACTOSYLDIACYLGLYCEROL 1, chloroplastic isoform X1
Cg2g032150	81.9207	46.8469	43.0709	46.1123	#N/A
Cg1g029580	15.1073	33.7346	34.5758	29.4565	calmodulin-binding transcription activator 3 isoform X1
Cg1g011610	63.1528	5.31044	16.8387	3.09966	defensin Ec-AMP-D2-like
Cg1g003370	41.1858	52.4955	50.9796	41.2133	protein HGV2 isoform X2
Cg8g023990	173.848	65.5504	64.2862	64.9369	non-specific phospholipase C1
Cg1g009820	45.591	28.6167	31.6318	29.4152	mediator of RNA polymerase II transcription subunit 9
Cg4g017910	40.1942	16.251	17.2544	17.5565	3-oxoacyl-[acyl-carrier-protein] synthase II, chloroplastic-like
Cg5g030260	10.8403	26.8456	24.5658	20.4809	U11/U12 small nuclear ribonucleoprotein 48 kDa protein
Cg2g027860	2.25176	27.0394	20.5499	19.4983	uncharacterized protein LOC18051656
Cg5g001360	9.16599	35.264	37.4896	28.6421	mitochondrial inner membrane protein OXA1
Cg1g004100	59.9467	18.3647	26.5659	18.1085	sulfite exporter TauE/SafE family protein 3-like
Cg2g043710	10.276	25.3132	23.5723	23.6839	probable alpha,alpha-trehalose-phosphate synthase [UDP-forming] 7
Cg1g019000	28.788	17.1179	17.9392	21.1779	protein TSS
Cg2g023900	15.3436	36.847	39.5512	30.6767	TBC1 domain family member 15-like
Cg4g003760	25.3804	39.0615	40.1445	34.1853	eukaryotic translation initiation factor 3 subunit L
Cg6g010350	64.0677	9.55637	5.81898	13.4834	CBL-interacting serine/threonine-protein kinase 14-like
Cg6g009620	27.294	41.2245	43.5062	33.5478	ubiquitin-activating enzyme E1 1-like
Cg4g014000	9.29186	48.2968	54.3314	45.0213	25S rRNA (cytosine-C(5))-methyltransferase nop2
Cg9g028670	17.8725	36.8491	37.1417	29.2409	splicing factor SF3a60 homolog
Cg9g029340	50.1299	15.7771	20.5437	11.7977	nuclear transcription factor Y subunit C-2
Cg2g028860	185.35	36.4434	15.6484	13.7063	purple acid phosphatase 8-like
Cg8g005560	21.8445	39.5132	43.4579	35.0317	B3 domain-containing transcription factor VRN1-like isoform X1
Cg6g019210	23.0353	7.3725	6.11696	11.7435	protein PLASTID MOVEMENT IMPAIRED 2
Cg5g028630	6.83349	18.932	20.3047	11.8501	INO80 complex subunit D-like
Cg4g001880	14.2621	43.2523	33.9326	31.1467	calcium uptake protein, mitochondrial
Cg4g006210	26.5151	49.7057	45.2378	53.0044	leucine--tRNA ligase, cytoplasmic
Cg2g000120	147.012	102.528	99.2198	103.065	uncharacterized protein LOC18051528 isoform X1
Cg5g009660	50.775	4.89291	4.41391	11.347	protein HOTHEAD-like
Cg5g025120	27.3375	44.7965	42.4266	48.4797	elongation factor 1-gamma
Cg1g014590	12.1112	27.9335	30.6478	23.7014	protein disulfide isomerase-like 1-6
Cg4g018880	34.1306	9.84309	15.4419	12.6181	thermospermine synthase ACAULIS5
Cg3g026110	6.77928	27.0765	26.6531	20.074	histone-lysine N-methyltransferase ATXR7
Cg2g046010	173.47	12.0525	13.9444	9.24104	major latex allergen Hev b 5-like
Cg9g001040	32.6497	16.7672	13.168	20.7582	transcription factor bHLH147
Cg5g009050	59.8765	20.5819	25.9567	28.4996	methylsterol monooxygenase 1-1-like
Cg3g022430	30.1132	11.9131	9.06995	18.2624	J domain-containing protein required for chloroplast accumulation response 1
Cg2g045320	114.274	18.5981	26.3123	22.5215	orotidine 5'-phosphate decarboxylase
Cg2g011420	14.4872	25.3591	26.9012	19.9107	phosducin-like protein 3
Cg2g010040	7.56446	27.0108	26.6848	26.4109	CASP-like protein 1F2
Cg2g023260	3.12944	28.9698	24.142	15.9983	(E)-beta-farnesene synthase-like
Cg3g016390	66.0465	51.1516	54.866	46.221	Elongation factor 4
Cg9g004180	53.3562	23.8349	20.2228	21.1355	H/ACA ribonucleoprotein complex subunit 1-like
Cg1g021080	24.9734	42.4103	38.9684	33.3559	60S ribosomal protein L7-1
Cg5g042170	35.5193	42.3238	44.2369	37.5844	product protein
Cg5g026460	23.9544	50.8309	47.3917	53.0278	something about silencing protein 10 isoform X2
Cg3g005990	38.1659	51.1999	46.515	42.4125	COP9 signalosome complex subunit 8
Cg2g030550	59.3457	33.4137	34.8445	35.2972	histone H2AX
Cg2g040060	25.7943	46.3867	44.7581	35.9749	mediator of RNA polymerase II transcription subunit 21
Cg4g022720	18.8628	4.33793	2.65219	16.2215	transcription factor IBH1-like 1
Cg8g012190	37.7074	18.5461	17.7832	23.7982	putative axial regulator YABBY 2 isoform X1
Cg5g029400	1.77778	19.3662	22.5112	15.3574	ATPase family AAA domain-containing protein 3-like
Cg3g014200	20.2044	32.0163	30.9424	28.8582	Detected protein of confused Function
Cg5g027590	84.0813	11.5422	13.5142	13.1324	probable hydroxyacylglutathione hydrolase 2, chloroplastic
Cg9g001700	37.3634	5.9534	7.20415	17.1018	GATA transcription factor 15-like
Cg4g022230	31.1044	76.4318	70.714	73.2182	calmodulin-binding protein 60 B-like isoform X1
Cg3g007830	61.1125	29.3065	26.6103	38.56	plastid lipid-associated protein 3, chloroplastic
Cg9g008760	17.6669	27.9068	21.2612	28.6665	gamma-interferon-inducible lysosomal thiol reductase
Cg2g041530	10.5427	23.6849	20.8651	22.3896	Bromodomain 4, putative
Cg7g001070	27.0925	7.36638	12.6634	14.8345	uncharacterized acetyltransferase At3g50280
Cg2g045700	20.4339	37.6914	35.4797	40.9541	protein CLMP1-like
Cg5g027690	37.5613	22.0957	21.5395	25.9435	F-box protein SKIP16
Cg5g009620	83.6223	15.3689	15.3996	17.6084	transcription factor TCP19-like
Cg5g006440	25.2873	7.61781	7.94312	12.3305	uncharacterized aarF domain-containing protein kinase 1-like
Cg1g014330	37.6182	21.5118	21.6862	18.1586	protein THYLAKOID ASSEMBLY 8, chloroplastic
Cg1g009300	29.9055	11.164	12.043	18.5816	jacalin-related lectin 19
Cg4g018610	33.48	21.4763	20.7641	24.0355	copper transporter 5
Cg7g016510	14.426	30.8109	34.3323	26.3925	COBW domain-containing protein 1
Cg1g021310	125.518	9.81307	14.4424	5.75495	cinnamoyl-CoA reductase 1-like
Cg6g005150	21.2747	10.2838	7.79247	12.3364	tropinone reductase homolog
Cg2g007820	21.7734	35.7125	31.5463	35.6113	mitochondrial inner membrane protease ATP23
Cg9g026960	35.7554	68.85	69.1663	66.9937	tripeptidyl-peptidase 2 isoform X1
Cg3g011060	58.0629	66.2175	74.2069	72.682	zinc finger protein 593
Cg3g018960	52.2635	20.0167	24.0309	23.0025	type IV inositol polyphosphate 5-phosphatase 3 isoform X6
Cg5g039950	26.6712	13.6124	14.3106	15.8543	NDR1/HIN1-like protein 12
Cg4g020590	53.4085	16.3952	17.8711	13.1012	auxin response factor 19-like
CgUng005620	40.874	10.683	14.2275	7.50322	probable amidase At4g34880
Cg2g030570	25.5501	10.491	10.8726	15.5158	A_TM021B04.11 protein
Cg2g008970	3.19307	14.3324	10.2818	16.3203	uncharacterized protein LOC107175629
Cg6g018980	16.5942	28.8927	23.7481	26.5253	EEF1A lysine methyltransferase 2-like
Cg5g015600	4.59904	17.4204	16.9502	9.62384	protein SRG1
Cg1g005860	6.54693	31.8622	24.2248	32.1726	cyclin-D3-2
Cg2g041810	3.03949	22.9898	22.7075	17.4453	putative serine/threonine-protein kinase
CgUng004800	69.4669	16.0766	14.6153	22.2898	dicarboxylate transporter 2.1, chloroplastic-like
Cg6g018960	62.7454	34.4442	35.2032	28.152	ribosome biogenesis protein erb1 isoform X2
Cg1g022600	21.9536	36.3366	33.2992	29.5331	oligouridylate-binding protein 1B-like
Cg6g002070	38.6237	19.144	20.938	26.9643	probable E3 ubiquitin-protein ligase LOG2
Cg6g010760	40.3215	20.7222	20.8105	21.9373	serine/threonine-protein kinase AtPK2/AtPK19-like
Cg5g031810	24.6953	6.93502	5.4232	12.643	cation/calcium exchanger 1
Cg9g003690	20.5485	40.4498	48.6785	36.9657	LOC107625215 isoform
Cg1g000550	3.84772	17.1445	17.2116	12.1503	54S ribosomal protein L19, mitochondrial
Cg5g026240	32.1227	45.0701	45.1924	41.3791	selenoprotein F
Cg8g004790	32.0559	15.578	16.6168	21.0388	uncharacterized protein LOC102610317
Cg3g014940	79.3108	21.7272	23.7777	29.2541	cryptochrome-1 isoform X1
Cg5g015480	13.1023	26.6354	28.4924	26.0844	zinc finger BED domain-containing protein RICESLEEPER 1-like
Cg4g009730	73.7166	20.697	20.875	25.859	protein SPA1-RELATED 3 isoform X1
Cg9g025540	11.0403	29.5749	29.172	25.6555	probable rRNA-processing protein EBP2 homolog
Cg5g039430	48.3062	11.2711	12.6948	12.4604	uncharacterized protein LOC18047012
Cg2g017940	62.9941	12.8612	17.5521	16.2497	cyclin-U1-1
Cg2g030750	53.4801	8.19008	9.06452	15.7356	E3 ubiquitin-protein ligase ATL6-like
Cg9g001210	37.2641	51.4157	47.5978	45.8617	huntingtin-interacting protein K
Cg3g000740	84.4028	8.7546	11.0704	18.4194	prolycopene isomerase, chloroplastic
Cg7g022470	21.4818	35.7429	37.7656	32.267	intron-binding protein aquarius
Cg1g014270	141.006	13.7828	14.1893	8.888	aquaporin TIP2-1
Cg7g002060	2.58483	27.615	26.4685	24.2707	#N/A
Cg7g004700	14.0717	49.1891	47.2964	45.2347	hypothetical protein CISIN_1g000307mg
Cg2g011310	8.4831	16.4309	20.7948	16.3377	F28J7.14 protein, putative isoform 1
Cg3g020350	13.4813	34.089	32.2325	30.9394	DUF668 domain-containing protein/DUF3475 domain-containing protein
Cg8g021960	47.8487	12.466	14.5686	12.1053	ACT domain-containing protein ACR9-like
Cg3g021550	19.8921	30.2835	32.6059	36.6812	DUF829 domain-containing protein
CgUng007040	44.1625	19.236	19.5104	11.9503	uncharacterized protein LOC102621648 isoform X1
Cg8g001740	16.9411	31.255	33.3016	26.4855	proteasome subunit alpha type-7
Cg2g041780	11.6716	21.7492	19.1234	20.5861	RNA polymerase II C-terminal domain phosphatase-like 1
Cg2g026670	47.7349	31.2928	31.8653	40.6213	GDP-fucose protein O-fucosyltransferase
Cg1g008330	3.48069	29.6849	29.4647	26.4298	DUF740 domain-containing protein
Cg3g008240	38.3252	11.928	5.94743	17.0211	probable xyloglucan endotransglucosylase/hydrolase protein 30
Cg1g009270	13.1124	27.4102	23.1876	26.13	40S ribosomal protein S30
Cg6g009930	29.437	9.56723	9.50381	16.2667	Methyltransferase FkbM
Cg2g028500	65.6695	32.6158	29.903	25.2286	NADH dehydrogenase [ubiquinone] 1 beta subcomplex subunit 7-like
Cg3g012750	69.0299	40.2737	39.1199	29.5684	interferon-related developmental regulator 1
Cg2g014900	18.8543	30.0093	32.2134	23.4095	frataxin, mitochondrial
Cg9g026630	2.50506	24.7536	28.1398	21.2388	F-box/LRR-repeat protein At3g48880
Cg2g018620	51.5996	15.5326	16.9518	21.9686	stress-response A/B barrel domain-containing protein UP3 isoform X1
Cg4g024210	37.1617	62.7502	66.1489	61.0586	probable cyclic nucleotide-gated ion channel 5
Cg7g021350	28.7363	18.2291	19.4662	20.6143	DNA ligase 1
Cg6g014780	7.43105	29.2992	28.8121	25.7216	lipid droplet-associated hydrolase isoform X1
Cg4g006380	31.0606	44.2185	39.1494	41.2693	---NA---
Cg7g009480	48.0195	13.0484	14.5676	16.8832	catalytic, putative
Cg1g001100	16.5553	27.1254	29.0176	24.1302	DNA-directed RNA polymerase II subunit 1
Cg4g021540	57.5448	16.7277	16.2531	14.847	plasma membrane ATPase 4
Cg5g041900	24.6811	41.8205	38.1485	41.4838	ATG8-interacting protein 1 isoform X1
Cg6g009750	40.0929	8.51136	9.09846	15.7258	abscisic acid receptor PYL4
Cg4g013720	1.65046	40.8397	44.3007	48.7114	nicotinamide/nicotinic acid mononucleotide adenylyltransferase
Cg1g021400	33.4895	44.6812	40.9813	39.4435	26S proteasome regulatory subunit 7
CgUng003850	48.2128	35.0654	30.0429	42.1126	costars family protein
Cg1g004460	8.68924	17.346	21.8917	17.1384	#N/A
Cg3g014330	47.5536	63.324	70.8259	59.3215	GEM-like protein 1
Cg6g011180	45.8654	19.5149	19.7614	19.8112	protein LURP-one-related 8-like
Cg5g032630	15.8958	33.8999	31.8512	31	guanine nucleotide-binding protein-like NSN1
Cg1g010750	81.7415	104.194	107.468	98.9584	proteasome subunit alpha type-6
Cg3g014460	29.7812	8.96778	7.43548	12.258	protein DETOXIFICATION 27-like
Cg3g014970	27.1897	35.8666	37.6119	30.1063	multifunctional methyltransferase subunit TRM112-like protein At1g22270
Cg1g008180	60.0569	5.42381	3.65181	9.4949	protein DETOXIFICATION 27-like
Cg9g025360	42.8067	14.2582	14.8012	21.9612	hydrolase, putative
Cg5g015200	11.1106	23.55	23.0086	18.0457	#N/A
Cg4g009960	22.4528	6.59874	7.51505	1.35131	squamosa promoter-binding protein 20
Cg1g009860	40.0834	6.63149	5.63198	9.04902	NDR1/HIN1-like protein 13
Cg5g029180	19.2809	36.0267	36.4253	36.7621	protein EXPORTIN 1A
Cg8g020110	41.914	14.1639	15.8026	15.6335	protein ENHANCED DISEASE RESISTANCE 2
Cg2g028330	11.9555	35.3931	38.6637	32.4959	probable sugar phosphate/phosphate translocator At1g06470
Cg7g016640	20.4643	38.4808	31.0512	37.4863	glucose-6-phosphate 1-dehydrogenase, chloroplastic isoform X1
Cg2g047230	16.4361	34.9374	29.4018	34.4207	probable leucine-rich repeat receptor-like protein kinase At5g49770 isoform X1
Cg1g019810	38.9158	15.2854	13.7319	18.5308	UDP-glycosyltransferase 73C1-like
Cg5g011270	41.2619	16.399	11.7184	14.242	histone deacetylase 5
Cg3g026000	56.8815	5.33558	3.79662	9.47508	hypothetical protein TorRG33x02_249970, partial
Cg4g004670	50.0277	33.875	31.5796	38.4186	uncharacterized protein LOC102616975 isoform X1
Cg8g001360	27.75	38.1129	33.7185	40.0212	uncharacterized protein LOC18035141
Cg6g023870	18.3597	35.3853	31.3592	34.1654	probable serine/threonine-protein kinase PIX7 isoform X2
Cg4g014830	41.5957	22.7111	21.0042	25.8223	protein ACTIVITY OF BC1 COMPLEX KINASE 3, chloroplastic
Cg9g007230	23.6296	9.7893	9.44904	16.4987	protein WVD2-like 3 isoform X1
Cg5g007890	22.6366	42.0174	40.7075	32.0914	transcription factor KUA1
Cg2g002540	20.9882	8.50909	13.4024	5.43342	transcription factor bHLH122 isoform X1
Cg7g001020	31.3095	61.602	61.9093	54.0292	probable signal peptidase complex subunit 2
Cg4g017190	41.9677	20.581	20.9013	16.7718	probable calcium-binding protein CML21
Cg9g017070	13.5619	31.7583	31.1558	22.7594	B3 domain-containing protein Os01g0234100
Cg5g006650	31.2364	75.7244	73.0936	70.646	nucleolar protein 56
Cg5g041500	26.0035	37.7941	37.7096	38.8023	exocyst complex component SEC10b
Cg5g041190	37.1844	12.7965	12.0363	20.0924	eukaryotic translation initiation factor 1A
Cg6g004720	68.2671	16.6469	19.2129	14.9315	ABC transporter I family member 20
Cg6g024560	77.7728	21.5589	20.8782	24.8974	haloacid dehalogenase-like hydrolase domain-containing protein Sgpp
Cg9g022830	43.334	9.78109	9.88212	20.6105	ethylene-responsive transcription factor ERF105-like
Cg5g039370	50.6216	72.7251	75.6675	74.6805	protoporphyrinogen oxidase 1, chloroplastic
Cg1g016160	3.06486	16.6301	13.94	14.8158	pleiotropic drug resistance protein 1-like isoform X1
Cg4g001140	16.0616	25.3789	25.6669	24.5468	DnaJ/Hsp40 cysteine-rich domain superfamily protein
Cg6g019690	21.5206	41.1848	38.5066	42.7658	T-complex protein 1 subunit zeta 1
Cg6g010710	7.63459	21.7379	23.7081	18.258	#N/A
Cg3g016360	39.7895	5.3558	2.89516	10.1467	WAT1-related protein At4g08300-like
Cg7g010360	24.8494	6.07532	4.59232	9.68753	squamosa promoter-binding-like protein 13A
Cg5g008320	9.50208	25.0385	22.0581	19.4007	probable ATP-dependent
Cg5g038220	17.2818	30.4647	27.0459	29.3529	60S ribosomal protein L29-1
Cg3g019240	95.9391	14.9785	22.1455	18.9063	NAD(P)H-quinone oxidoreductase subunit T, chloroplastic
Cg6g019510	8.64632	21.4685	28.6326	19.6676	uncharacterized protein LOC101203988 isoform X5
Cg1g023350	12.2544	24.0936	24.447	20.4411	ras-related protein RABC1
Cg4g000310	20.455	47.038	50.1694	38.3717	myosin heavy chain, striated muscle isoform X2
Cg1g008160	93.974	5.26715	4.29144	11.2493	protein DETOXIFICATION 27-like
Cg3g017470	30.835	16.3558	19.4527	14.5922	Matrix 1
Cg8g023130	25.3836	38.2144	43.7313	31.1014	DNA-directed RNA polymerase II subunit RPB7
Cg4g004490	47.6644	38.0174	38.992	35.5046	mitochondrial import inner membrane translocase subunit TIM17-2-like
Cg7g020010	23.849	32.236	37.2114	31.2452	chaperone protein dnaJ 16
Cg1g009530	56.3249	8.9297	12.5521	8.11682	ABC transporter C family member 8 isoform X1
Cg5g020490	26.3142	44.3047	44.3194	44.4382	probable ribosome biogenesis protein RLP24
Cg8g000080	6.83634	26.0482	24.8501	22.2764	pentatricopeptide repeat-containing protein At4g38150
Cg1g014500	8.5221	21.6186	14.1074	19.9148	homeobox-leucine zipper protein GLABRA 2
Cg1g003610	24.3847	16.3259	15.7976	13.1175	elongation of fatty acids protein 3-like
Cg9g000290	110.969	22.0581	24.1458	30.9041	pyruvate dehydrogenase (acetyl-transferring) kinase, mitochondrial
Cg6g004730	53.3091	11.934	8.93137	8.80179	expansin-A4-like
Cg6g015180	46.7084	30.4693	28.7754	30.9274	protein ORANGE-LIKE, chloroplastic
Cg2g031300	30.3283	45.6363	43.9596	38.5769	sucrose nonfermenting 4-like protein
Cg3g018490	18.2747	43.0375	42.5672	51.3862	thioredoxin Y1, chloroplastic
Cg9g009380	51.4142	76.2278	70.5738	63.2771	heterogeneous nuclear ribonucleoprotein 1
Cg4g017090	6.05956	26.1003	28.2189	24.1492	oleosin 20.3 kDa-like
Cg4g020720	19.1185	4.98642	3.36095	15.1941	ABC transporter I family member 17
Cg2g009390	4.03143	14.881	13.3625	17.2913	DNA cross-link repair protein SNM1
Cg2g032090	28.6663	16.8522	23.3529	17.53	probable protein phosphatase 2C 5
Cg9g025460	18.4791	30.3992	29.6903	25.2369	chloride conductance regulatory protein ICln
Cg4g004760	55.1525	34.4807	30.6368	36.8525	#N/A
Cg2g018950	18.6342	38.3348	44.2399	42.4521	serine/threonine protein phosphatase 2A 59 kDa regulatory subunit B' gamma isoform-like
Cg9g016350	34.982	20.3236	19.5869	27.4233	protein STRICTOSIDINE SYNTHASE-LIKE 10-like
Cg5g027720	37.7297	13.9382	16.9872	18.9562	electron transfer flavoprotein-ubiquinone oxidoreductase, mitochondrial isoform X1
Cg2g028360	12.2563	37.7763	34.6878	30.5833	probable sugar phosphate/phosphate translocator At1g06470
Cg4g007250	45.5831	29.0299	32.0112	31.2435	uncharacterized protein LOC18054512
Cg3g014880	54.5723	10.5624	15.9219	12.1242	#N/A
CgUng002200	12.2963	21.9635	23.1858	19.1949	histone deacetylase 15 isoform X1
Cg5g012980	1.08754	23.3002	23.2237	25.7428	#N/A
Cg6g001830	3.78353	20.2239	19.0564	19.1168	pentatricopeptide repeat-containing protein At2g37230
Cg7g023670	15.9278	10.0165	5.50421	10.3589	beta-glucosidase 17-like isoform X2
Cg5g007540	138.965	7.28222	14.3095	9.05885	glycine-rich protein 23
Cg4g014760	31.9448	20.1995	24.0654	23.6777	Glutaredoxin family protein
Cg8g012330	23.143	49.9502	52.3275	42.4734	serine/threonine-protein phosphatase BSL3
Cg9g021310	9.82767	25.3708	22.788	23.2268	probable LRR receptor-like serine/threonine-protein kinase At3g47570
Cg3g013370	10.1459	17.7478	19.7479	15.1295	protein FAM135B-like
Cg2g023790	0	10.557	7.53337	10.3325	receptor-like protein EIX2
CgUng001520	32.6259	15.4241	20.3661	4.79708	protein ALP1-like
CgUng021690	39.571	18.6777	15.8631	21.0484	hypothetical protein CISIN_1g032059mg
Cg2g045490	47.3936	23.6429	25.5602	14.1052	glycosyltransferase BC10-like
Cg8g024160	21.1306	8.55272	12.5865	14.4943	phosphoinositide phospholipase C 4-like
Cg2g008820	95.4966	32.1034	25.3351	34.4107	phospholipase A1-IIdelta
Cg9g007170	38.2363	16.6028	13.0858	19.5139	P-loop containing nucleoside triphosphate hydrolase
Cg4g022260	83.6742	31.7563	27.6635	30.6134	Serine/threonine protein kinase, putative isoform 1
Cg2g017680	16.7802	36.0663	41.781	34.0315	histone-lysine N-methyltransferase ATXR3
Cg6g003550	3.79868	19.5013	19.6157	11.9008	---NA---
Cg2g015290	18.0728	37.0243	33.7447	35.9418	vesicle-associated protein 4-2-like
Cg2g020890	1.20982	10.3593	7.21895	17.8611	E3 ubiquitin-protein ligase RMA3-like
Cg4g013950	12.7832	26.6406	26.1605	21.8619	WEB family protein At5g55860
Cg2g029240	4.89116	22.5416	19.3765	25.3857	heat stress transcription factor A-8
Cg2g004970	179.458	50.03	43.9228	37.2509	RING/U-box superfamily protein isoform 1
Cg3g004960	17.0572	8.39267	12.7943	8.45831	ABSCISIC ACID-INSENSITIVE 5-like protein 2
Cg5g036620	273.749	18.8664	16.5182	20.6635	probable indole-3-pyruvate monooxygenase YUCCA10
Cg5g007760	32.4423	12.9399	13.6302	5.31953	ethylene-responsive transcription factor 5-like
Cg1g025200	22.7239	10.388	13.8894	8.70947	BTB/POZ domain-containing protein At2g13690
Cg6g007780	21.683	32.0296	33.829	28.9983	dual specificity protein kinase YAK1 homolog isoform X1
Cg6g012660	64.3272	26.7354	28.9861	25.4531	uncharacterized protein LOC18040003
Cg5g041620	19.6724	34.1499	29.7421	35.8957	CAAX prenyl protease 1 homolog
Cg1g012540	14.1945	27.4917	25.7335	23.2113	#N/A
Cg1g009600	40.5903	4.77223	2.58187	7.99994	calcineurin B-like protein 10
Cg3g003360	6.7537	22.2012	23.6878	17.038	galactoside 2-alpha-L-fucosyltransferase-like isoform X2
Cg9g012480	25.9945	7.02919	6.43194	12.589	protein PHR1-LIKE 3 isoform X1
Cg3g014580	26.7665	11.9569	11.4118	13.9737	isoamylase 3, chloroplastic isoform X1
Cg6g014170	8.99841	24.0563	27.5222	21.0487	heat stress transcription factor A-5
Cg7g021130	7.29597	20.9163	23.2282	17.9405	MATH and LRR domain-containing protein PFE0570w-like
Cg7g020210	106.8	19.6037	16.9877	12.8049	transcription factor MYB1R1
Cg8g002550	6.43527	21.7204	15.2548	17.2781	pyruvate kinase isozyme A, chloroplastic-like
Cg5g007570	67.9524	9.70839	12.4242	13.635	monooxygenase 2 isoform X1
Cg2g028600	4.44858	20.3847	15.9618	15.7229	probable potassium transporter 17
Cg6g002640	9.02807	22.1349	22.0789	17.2767	mitochondrial import inner membrane translocase subunit TIM14-1
Cg9g001150	37.0502	28.5316	26.1859	30.2433	probable enoyl-CoA hydratase 1, peroxisomal
Cg2g040360	33.2543	8.95654	10.731	4.88327	pectinesterase
Cg2g001260	5.83677	29.6861	29.2024	26.9827	notchless protein homolog
Cg1g007880	76.3038	31.613	37.7123	28.999	mechanosensitive ion channel protein 2, chloroplastic-like isoform X1
Cg3g009550	66.5982	14.5567	18.7155	20.6697	hypothetical protein CUMW_202060
Cg4g018840	7.97244	23.5286	26.112	19.8988	E3 ubiquitin ligase PQT3-like isoform X1
Cg1g010140	0.95172	17.681	13.2233	19.649	aminopeptidase M1-like isoform X1
Cg2g046750	48.7041	26.4425	27.2221	23.2588	probable galacturonosyltransferase 4
Cg4g021440	16.535	29.5433	29.7144	22.8719	membrane-associated progesterone-binding protein 4
Cg5g005350	13.9034	30.1216	29.1666	32.2637	short-chain dehydrogenase TIC 32, chloroplastic
Cg3g001570	44.3093	52.603	57.1695	48.0904	probable trehalase
CgUng003210	15.7095	6.70067	8.99197	5.52764	protein OPI10 homolog
Cg5g010560	42.2167	6.73724	6.00002	13.2479	probable receptor-like protein kinase At5g61350
Cg1g012330	3.49747	18.8854	12.9959	19.9803	sugar transport protein 14
Cg2g025510	32.1603	17.0174	17.8244	12.1705	Transglut_core2 domain-containing protein
Cg5g040310	51.0413	8.84924	12.3958	8.02502	vegetative cell wall protein gp1
Cg4g012800	17.2544	48.5929	48.8874	42.9986	grpE protein homolog 2, mitochondrial isoform X3
Cg7g016730	19.6386	37.2716	37.2819	38.8827	sphingosine-1-phosphate lyase isoform X2
Cg1g004330	8.18544	17.7642	13.0465	16.085	DNA-3-methyladenine glycosylase 1
Cg1g023770	71.2314	18.7853	16.9791	20.126	Excinuclease ABC
Cg3g024230	11.0807	51.1679	47.5767	52.8149	DEAD-box ATP-dependent RNA helicase 28
Cg2g020320	30.5032	5.63813	7.784	13.709	fasciclin-like arabinogalactan protein 2
Cg8g017190	4.2687	14.9594	9.82117	15.5708	---NA---
Cg3g011990	26.0893	8.44105	11.2548	12.4536	kinesin-like protein KIN-14U
Cg9g027830	24.3318	6.42195	5.16172	9.96078	nuclear valosin-containing protein-like
Cg2g016990	5.15995	12.8491	13.6013	15.236	hypothetical protein CUMW_234470, partial
Cg2g007870	22.9782	37.5352	37.4803	32.1111	T-complex protein 1 subunit eta
Cg2g007140	13.4961	64.2868	62.4229	59.5231	pescadillo homolog
Cg7g006690	2.5862	24.4498	20.1882	15.4275	protein ENHANCED DISEASE RESISTANCE 2-like
Cg5g030920	70.6036	59.4538	61.8541	64.0835	chaperonin CPN60-2, mitochondrial-like
Cg1g006170	20.8204	11.3505	10.6424	14.5647	hypothetical protein CISIN_1g031007mg
Cg8g020360	162.918	9.76671	14.7826	7.11883	probable aquaporin PIP2-2
Cg4g019610	37.8644	13.7203	23.3487	7.83093	putative chloride channel-like protein CLC-g
Cg9g021370	3.84682	13.6491	9.67368	16.5081	receptor kinase-like protein Xa21
Cg5g029050	8.70139	20.6305	19.4623	14.0631	pentatricopeptide repeat-containing protein At4g18975, chloroplastic isoform X2
Cg8g022400	11.456	28.4007	25.8573	22.4636	mitochondrial import inner membrane translocase subunit TIM9
Cg3g013850	30.9613	25.2067	28.3848	22.0647	GATA transcription factor 25 isoform X1
Cg9g019440	130.447	64.5155	49.5435	57.4413	ras-related protein Rab7
Cg7g001690	10.563	29.8473	34.3563	25.2554	probable nucleolar protein 5-2
Cg8g008880	16.499	26.7642	29.3259	28.6686	protein BASIC PENTACYSTEINE4-like
Cg6g024440	28.7503	4.25995	2.75574	13.0862	protein N-lysine methyltransferase METTL21A-like
Cg7g000320	32.1768	10.9467	12.4077	10.6518	7-deoxyloganetic acid glucosyltransferase-like
Cg7g018890	19.9225	8.78845	8.42698	11.8611	hypothetical protein CISIN_1g013721mg
Cg2g027870	5.51307	14.3466	15.2962	12.2676	protein FAR1-RELATED SEQUENCE 5-like
Cg8g003010	22.5259	18.2447	23.0668	15.0887	hypothetical protein CICLE_v10030423mg
Cg6g025310	27.4397	42.2376	42.8716	35.7239	SNF1-related protein kinase catalytic subunit alpha KIN10
Cg2g020150	4.35885	24.2756	22.0714	26.3604	exosome complex component RRP42
Cg1g003950	45.7044	28.6006	28.5433	28.9678	splicing factor 3B subunit 4
Cg1g005640	14.801	25.1873	25.5897	29.2411	polyadenylate-binding protein 2-like
Cg3g015280	81.6009	23.9501	14.5183	12.1776	random slug protein 5
Cg6g015850	63.1169	7.04882	5.63552	12.3852	solute carrier family 35 member F1-like
Cg9g017190	34.1541	15.427	18.1299	20.4175	lycopene beta-cyclase
Cg5g044410	11.3012	6.04066	8.80707	3.5709	serine/threonine-protein kinase D6PK
Cg3g013310	29.2158	9.95833	9.68446	14.5826	MATH and LRR domain-containing protein PFE0570w
Cg2g043020	12.5168	28.5779	24.9515	20.8746	nudix hydrolase 15, mitochondrial
Cg4g007900	141.144	25.9453	26.2733	26.3096	SOUL heme-binding family protein isoform 1
Cg1g007920	61.9469	10.1501	12.6116	13.7751	kinesin-like protein KIN-14B isoform X1
Cg4g005030	6.98105	16.8694	16.7115	13.2333	mitotic spindle checkpoint protein MAD1 isoform X1
Cg4g007330	72.1939	25.2023	23.9018	25.1894	embryo-specific protein ATS3A
Cg3g002290	68.4447	17.0492	16.791	13.4698	TMV resistance protein N-like isoform X3
Cg4g000580	18.4267	39.2224	42.6994	36.9799	RNA polymerase I-specific transcription initiation factor rrn3 isoform X1
Cg6g003010	14.542	25.8042	25.9665	22.4503	adenylate kinase 1, chloroplastic
Cg1g002910	16.9946	26.4155	27.7005	20.5371	Transducin/WD40 repeat-like superfamily protein isoform 2
Cg6g009230	21.3618	32.1031	31.7942	28.0782	phosphoinositide phosphatase SAC8 isoform X1
Cg5g001990	31.9472	43.0523	43.4344	41.3549	Putative membrane peptidase ydiL
Cg4g013900	24.2995	10.9488	12.3004	12.7513	---NA---
Cg2g021460	9.63365	19.6495	20.7852	17.3878	trafficking protein particle complex II-specific subunit 130 homolog
Cg2g042110	38.6289	10.5792	10.3643	13.9646	callose synthase 11-like
Cg7g018620	3.95908	14.5385	20.0008	12.9759	protein MAK16 homolog
Cg6g005220	57.7496	9.1425	13.8615	7.18229	ultraviolet-B receptor UVR8-like isoform X1
Cg8g010050	20.7323	39.277	38.5452	31.1568	cell division cycle 5-like protein
Cg4g000350	5.48413	18.1579	22.5123	14.4185	PHD finger protein 21A isoform X1
Cg9g005490	23.2196	33.088	33.9054	27.9967	imidazoleglycerol-phosphate dehydratase
Cg1g025460	15.8669	32.2599	33.919	27.9678	zinc finger CCCH domain-containing protein 38 isoform X1
Cg2g032440	4.5856	34.3409	36.715	32.1982	lon protease homolog 1, mitochondrial
Cg8g017110	119.032	4.0148	5.16768	10.5699	protein REVEILLE 7-like isoform X1
Cg1g004450	16.6476	33.461	33.2282	29.8234	phosphopantetheine adenylyltransferase
Cg4g019720	12.3038	21.0008	26.0861	18.6787	MuDR family transposase, putative isoform 1
Cg2g005190	3.35085	23.7663	23.7161	21.1153	#N/A
Cg3g017550	39.5603	10.0721	14.2312	7.24414	F-box protein SKP2A-like
Cg4g019830	16.2478	7.47517	6.12178	11.2394	heparanase-like protein 3
Cg2g033620	526.68	31.3312	13.3006	6.86317	fold protein
Cg2g016600	1.56944	20.8886	20.9243	15.3259	LETM1 and EF-hand domain-containing protein 1, mitochondrial-like
Cg2g045590	37.9035	50.2206	48.7339	45.4112	50S ribosomal protein L4-like isoform X1
Cg1g022330	16.7424	38.6452	38.3581	36.4437	U2 small nuclear ribonucleoprotein B''
Cg8g020480	81.666	24.2987	19.7957	18.4537	probable pyridoxal 5'-phosphate synthase subunit PDX2
Cg6g009070	74.3919	5.17523	6.1093	9.88455	cytochrome b561 and DOMON domain-containing protein At3g25290-like
Cg6g016140	20.105	5.6119	5.56545	3.0851	zinc-regulated 8
Cg7g012190	31.8919	12.3	16.6275	15.6492	transcription factor PIF4-like
Cg4g011120	27.0478	17.0644	18.2804	12.03	protein DETOXIFICATION 16-like
Cg7g018370	12.2222	25.61	23.4697	21.4344	Ribosomal_S21 domain-containing protein
Cg1g014110	12.6625	27.873	26.4186	22.2314	nuclear pore complex protein NUP35-like
Cg8g004880	5.27441	17.0778	17.6196	21.3993	presequence protease 1, chloroplastic/mitochondrial-like
Cg5g007930	11.6327	6.65461	4.65052	8.01234	ethylene-responsive transcription factor ERF039-like
Cg9g021930	48.8352	9.43026	7.65506	11.4105	RING/FYVE/PHD zinc finger superfamily protein, putative isoform 1
Cg5g036130	6.4835	20.3272	23.7641	15.7915	exosome complex component RRP4 homolog
Cg6g018240	20.3086	5.38845	6.5893	10.0178	probable inactive receptor kinase RLK902
Cg5g039290	26.9983	50.298	51.0869	45.7557	proline--tRNA ligase, cytoplasmic isoform X1
Cg3g022860	1.36723	8.5806	6.8541	7.3922	zinc-finger homeodomain protein 5
Cg1g008730	12.7327	31.689	31.7018	34.8791	surfeit locus protein 6 homolog
Cg2g040960	21.4501	15.1239	7.6653	13.891	probable NAD(P)H dehydrogenase (quinone) FQR1-like 1 isoform X1
Cg6g020950	49.3065	16.7436	18.4737	16.4518	F-box protein CPR1
Cg7g022990	4.089	11.7253	9.13257	10.4344	polyamine oxidase 1 isoform X1
Cg4g013290	11.8111	24.1262	26.1083	20.3107	protein transport protein Sec24-like At3g07100
Cg8g005410	5.29701	32.666	32.51	34.8945	uncharacterized protein LOC102614739 isoform X2
Cg2g026640	1.87061	25.8016	22.8416	27.4343	protein ROOT PRIMORDIUM DEFECTIVE 1
Cg2g043260	13.825	6.7443	4.61707	10.1912	transcription factor bHLH106-like
Cg4g014970	15.4504	32.8925	29.6743	35.0575	probable protein arginine N-methyltransferase 1.2
Cg6g015570	101.255	4.24382	4.72952	9.23937	protein BIC1
Cg9g022110	25.177	46.3043	49.415	41.9361	1-acyl-sn-glycerol-3-phosphate acyltransferase 2
Cg6g007290	26.9853	18.9863	22.5839	16.4369	hydroxyethylthiazole kinase
Cg6g004810	132.178	4.85829	10.6064	2.42708	haloacid dehalogenase-like hydrolase
Cg2g036920	74.3113	14.3932	21.3578	12.965	galactan beta-1,4-galactosyltransferase GALS3-like
Cg7g010680	18.13	25.8801	21.1731	27.1245	mitochondrial import inner membrane translocase subunit TIM8
Cg8g023060	27.4398	6.00566	2.72962	9.57899	tropinone reductase homolog At2g29170-like
Cg1g024520	14.4496	29.5873	34.166	27.2139	vacuolar protein sorting-associated protein 20 homolog 2-like
Cg9g012660	17.6848	11.6984	8.01781	13.871	uncharacterized protein LOC102608590
Cg5g040200	32.6235	12.4906	6.34367	9.56518	transcription factor MYC2-like
Cg1g014550	50.8606	60.5809	59.9824	60.4306	hydroxyphenylpyruvate reductase
Cg2g005200	5.64753	28.1878	28.3762	26.6888	protein AATF
CgUng005470	16.0052	4.26812	4.39539	9.21072	indole-3-acetic acid-induced protein ARG7-like
Cg7g014330	11.5336	46.2655	45.0323	46.5066	mitochondrial import receptor subunit TOM40-1-like
Cg1g010760	28.718	17.3935	20.2605	14.8453	inter-alpha-trypsin inhibitor heavy chain H3
Cg6g005580	56.8121	27.4279	26.8772	24.2168	mitochondrial substrate carrier family protein B
Cg2g006980	23.1098	4.8217	4.14041	8.47909	high affinity nitrate transporter 2.7
Cg5g022760	64.7463	45.5419	40.6777	47.1342	NADH dehydrogenase [ubiquinone] 1 beta subcomplex subunit 10-B-like
Cg5g003160	40.4429	21.4705	23.334	22.4868	Transmembrane protein
Cg6g008290	20.8995	11.0299	15.435	10.6619	glycine-rich protein A3-like
Cg1g009780	9.14907	19.9736	21.6286	16.0217	putative hydrolase C777.06c isoform X1
Cg6g018030	4.42241	14.5725	14.5745	11.0177	transmembrane protein 214-like
Cg5g000410	244.249	11.8814	14.4892	16.9081	beta-carotene isomerase D27, chloroplastic
Cg4g021280	1.63175	13.5035	11.89	14.1679	OSBP(oxysterol binding protein)-related protein 4B
Cg7g011210	56.645	23.3643	20.2943	23.2291	protein MEI2-like 1 isoform X1
CgUng005680	42.7779	32.8532	42.8589	35.3098	eukaryotic translation initiation factor 4B3
Cg2g040470	29.0729	1.8588	3.09279	8.53679	gibberellin 2-beta-dioxygenase 8
Cg2g028350	3.72361	21.291	18.2624	17.6199	G-type lectin S-receptor-like serine/threonine-protein kinase SD2-5
Cg1g001230	8.36407	32.2105	32.7224	29.1099	pre-rRNA-processing protein esf1
Cg1g003420	26.6895	8.58028	8.71761	13.7904	CASP-like protein ARALYDRAFT_485429
Cg3g008690	67.7145	36.3417	41.344	36.2926	secretory carrier-associated membrane protein 4
Cg2g033920	174.529	4.52055	6.13339	9.70652	multicopper oxidase LPR1-like
Cg4g006270	34.3972	19.1515	18.201	22.8748	ras-related protein RABA2a
Cg1g019310	46.9577	19.3017	21.0349	21.8894	MADS-box protein JOINTLESS-like
Cg4g017880	88.4277	29.6371	30.125	27.5579	#N/A
Cg2g002790	23.1298	5.68249	5.18242	8.60991	DUF1680 domain-containing protein
Cg7g000590	11.7945	39.8304	38.9038	34.1585	Mitochondrial glycoprotein
Cg9g005160	18.5273	3.44719	1.42294	4.71716	probable membrane-associated kinase regulator 1
Cg6g020190	32.3353	12.416	13.452	11.2952	protein GLUTAMINE DUMPER 6-like
Cg6g003320	18.2611	39.2097	41.875	35.9319	hypothetical protein CUMW_204760
Cg7g002260	16.1699	5.70219	5.11497	9.19708	LOB domain-containing protein 21
Cg5g031440	49.3784	16.9313	15.4026	9.49814	Transmembrane protein
Cg1g012570	13.8646	27.1841	30.139	22.2883	NADPH:adrenodoxin oxidoreductase, mitochondrial
Cg8g022720	25.3257	6.61557	9.08162	11.3334	abscisic acid 8'-hydroxylase 2
Cg8g024060	59.3452	13.6338	19.2227	13.6469	vacuolar cation/proton exchanger 3-like
Cg2g011610	11.2389	31.2631	34.1162	26.3051	54S ribosomal protein L37, mitochondrial
Cg3g024270	10.919	3.37796	3.03358	7.00901	receptor protein kinase CLAVATA1-like
Cg4g012640	27.1374	36.887	34.1832	32.9857	adenylyltransferase and sulfurtransferase MOCS3
Cg4g022140	47.0836	7.84655	5.05186	7.43952	xyloglucan endotransglucosylase/hydrolase protein 22-like
Cg6g012650	64.8627	53.5462	49.3242	50.3414	muscle M-line assembly protein unc-89-like
Cg5g037020	21.7118	3.5621	2.45817	8.79428	heavy metal-associated isoprenylated plant protein 36
Cg6g024550	42.238	15.287	16.7454	18.5724	dynamin-related protein 1E
Cg7g014760	42.608	8.38913	14.3565	6.21644	BRO1 domain-containing protein BROX
Cg3g018280	12.0601	2.81268	4.42376	10.4091	vacuolar iron transporter homolog 1-like
Cg3g003590	5.9164	11.4647	15.7986	14.0288	---NA---
Cg9g021900	1.1092	10.0055	11.5742	7.48818	putative pentatricopeptide repeat-containing protein At5g52630
Cg9g019480	108.397	4.54373	5.83483	11.9173	pentatricopeptide repeat-containing protein At5g21222-like isoform X1
Cg7g019600	72.4203	8.88097	5.59089	9.3138	potassium transporter 6-like
Cg3g019060	22.8779	8.42096	12.1484	10.7773	polyadenylate-binding protein 3
Cg5g028800	40.2986	10.384	10.6126	13.131	Pentatricopeptide repeat superfamily protein isoform 1
Cg5g010090	5.93662	25.4593	25.3782	24.7719	probable DEAD-box ATP-dependent RNA helicase 48
Cg5g022670	18.8526	32.1283	27.584	28.0925	extended synaptotagmin-1 isoform X1
Cg2g044590	22.6452	9.43622	10.0872	14.3516	tobamovirus multiplication protein 1-like isoform X10
Cg6g018850	17.5989	35.5231	38.2818	32.3253	E3 ubiquitin-protein ligase SINA-like 10
CgUng002330	13.935	26.3591	27.7527	24.2353	protein CASP
Cg7g005600	23.8059	7.01534	6.27863	9.18146	chalcone isomerase
Cg1g003480	7.93406	16.4192	17.7914	11.9286	histone-lysine N-methyltransferase SUVR5 isoform X1
Cg3g016090	24.6817	7.22974	7.38698	11.9682	glycine-rich protein 2-like
Cg3g014710	9.33425	18.9001	18.6462	14.5945	serine/threonine-protein kinase SAPK2
Cg3g008720	17.1557	7.00798	9.42855	4.03155	UDP-glycosyltransferase 83A1-like
Cg5g024090	18.8663	36.2312	35.5295	31.1263	protein DOWNY MILDEW RESISTANCE 6
Cg7g020760	45.7004	8.32459	10.3841	12.4128	SNF1-related protein kinase regulatory subunit gamma-1-like
Cg6g023360	22.7442	31.2502	31.0455	33.6262	ankyrin repeat and SAM domain-containing protein 6
Cg2g044930	41.5843	12.4377	20.748	10.1328	F-box/kelch-repeat protein At1g30090
Cg2g044760	36.1254	54.085	57.1231	51.4446	prefoldin subunit 6
CgUng022200	3.18733	17.0706	13.9609	13.274	hypothetical protein CISIN_1g034734mg
Cg4g011990	13.2101	30.4351	27.1278	26.6521	probable serine/threonine protein kinase IREH1 isoform X1
CgUng003970	5.52387	13.9743	9.58683	13.2735	putative DNA (cytosine-5)-methyltransferase CMT1
Cg5g022130	41.3964	18.4701	18.4478	19.7167	hypothetical protein CISIN_1g015519mg
Cg6g017220	7.64921	19.2686	18.0788	23.1565	protein sym-1
Cg3g013090	28.7633	4.61442	4.21584	9.40479	hypothetical protein CICLE_v10002882mg
Cg7g020170	24.8786	38.6498	40.5145	33.3804	paired amphipathic helix protein Sin3-like 4 isoform X1
Cg2g021770	11.6598	26.6138	26.296	24.8714	uncharacterized protein LOC18054547
Cg5g026260	6.61886	15.5847	17.9801	12.7889	putative UPF0481 protein At3g02645
Cg7g002690	21.8958	7.59078	7.20316	11.8521	protein RETICULATA-RELATED 5, chloroplastic
Cg2g005600	20.0675	6.77904	8.96549	2.80362	NDR1/HIN1-like protein 13
Cg2g007650	3.10614	9.36086	5.54462	10.0667	ubiquitin
Cg9g002100	32.6557	7.58972	11.3305	8.32047	probable protein phosphatase 2C 34
Cg2g001110	40.7075	9.40787	12.4717	7.59939	Pentatricopeptide repeat-containing protein
Cg5g036060	34.341	8.85949	6.8716	11.3933	RNA demethylase ALKBH10B
Cg1g014450	38.4243	7.83119	11.0789	5.43723	probable plastidic glucose transporter 3
Cg6g024480	4.37345	16.6559	19.789	12.699	#N/A
Cg4g017020	19.8151	33.0277	28.5044	30.2633	DNA damage-inducible protein 1
Cg1g007480	9.57178	22.4391	20.9235	20.0689	protein BRICK 1
Cg1g007220	15.9226	6.78305	8.39854	9.69016	leucine-rich repeat receptor-like serine/threonine-protein kinase BAM1
Cg5g014050	12.0059	20.6829	22.2907	18.0238	FACT complex subunit SPT16
Cg7g021680	23.2934	7.02625	7.09006	10.8682	probable protein S-acyltransferase 22
Cg5g017020	57.1552	14.7186	16.6558	16.027	acid phosphatase 1
Cg9g021480	5.59594	15.8337	12.1665	11.1381	---NA---
Cg3g006650	14.0533	22.5662	23.0264	22.3405	retinoblastoma-related protein
Cg7g007350	126.917	49.7101	48.4667	40.7729	putative ycf45
Cg3g013000	36.3104	16.7192	11.2944	14.8034	serine carboxypeptidase-like 17 isoform X3
Cg7g022080	117.851	11.8491	8.05593	2.95716	glycerophosphodiester phosphodiesterase GDPD1, chloroplastic-like isoform X1
Cg2g029000	15.8067	23.2469	23.9955	21.069	receptor protein kinase TMK1-like isoform X1
CgUng006260	9.24536	20.1544	17.9486	17.3388	probable 3-beta-hydroxysteroid-Delta(8),Delta(7)-isomerase
Cg2g037790	6.55414	23.064	26.7281	24.7929	hypothetical protein CICLE_v10011170mg
Cg7g014750	19.7389	25.4315	27.626	23.0665	mediator of RNA polymerase II transcription subunit 25 isoform X2
Cg1g011080	2.81924	11.617	13.0142	7.9441	peroxisomal (S)-2-hydroxy-acid oxidase GLO4
Cg9g021330	6.12476	17.4794	15.6104	16.6802	receptor kinase-like protein Xa21
Cg2g036770	73.4449	30.76	35.111	33.7295	protein ELF4-LIKE 4
Cg2g037140	1.79147	13.087	12.7236	15.297	phosphatidate cytidylyltransferase, mitochondrial isoform X1
Cg9g003100	62.6113	7.93774	10.713	5.70391	protein SRC2-like
Cg6g025550	104.137	5.86894	3.86599	10.1194	UPF0301 protein Plut_0637
Cg2g025340	16.2495	6.87888	11.5884	5.07169	hypothetical protein CUMW_240150
Cg5g035950	6.64017	17.3941	13.9254	18.0373	mediator of RNA polymerase II transcription subunit 33B-like isoform X1
Cg8g007650	25.5613	8.73677	2.09008	4.11037	AAA-ATPase At3g50940-like
Cg2g011430	21.6462	33.3846	33.3394	28.3078	COP9 signalosome complex subunit 3
Cg7g000970	67.6227	29.0653	30.2827	28.1925	coronatine-insensitive protein 1
Cg4g014480	49.0446	16.8643	17.8475	18.1365	Nuclear transport factor 2 family protein
Cg6g001290	9.18123	20.3	15.558	19.2528	R3H domain-containing protein 1-like isoform X2
Cg7g008620	3.01001	18.5906	17.7694	17.0639	hypothetical protein CISIN_1g008200mg
Cg8g008690	26.2254	15.6159	15.2413	14.2523	uncharacterized protein LOC102606906
Cg5g010290	52.7628	4.36933	7.26849	8.32798	cyclic dof factor 3
Cg1g006360	25.7392	5.46297	7.82582	11.7048	uncharacterized protein LOC102610728
Cg3g008970	26.3606	8.51691	3.66905	8.57024	isoflavone reductase homolog
Cg2g010900	84.2524	5.03024	8.74841	6.87654	plant/MOJ10-14 protein
Cg1g027920	45.1372	4.70491	4.34576	6.69779	scarecrow-like protein 15
Cg2g007660	14.4336	41.6363	40.2052	42.1645	pentatricopeptide repeat-containing protein At4g35850, mitochondrial
Cg4g020020	33.3916	6.5501	8.47392	7.81616	organic cation/carnitine transporter 7-like
Cg1g020030	47.6753	3.99193	4.54688	9.32659	shikimate O-hydroxycinnamoyltransferase-like
Cg6g002340	49.1835	4.45769	5.39663	8.11804	unnamed product
Cg2g033210	25.8867	12.325	7.20142	3.46536	acyl-CoA-binding domain-containing protein 3
Cg2g009090	11.0468	16.6401	15.1227	18.7216	protein Mpv17
Cg3g010710	19.6308	32.0825	33.12	26.6621	PITH domain-containing protein At3g04780
Cg1g027710	355.167	7.94639	9.60377	8.44702	ABC transporter F family member 5-like
Cg4g020050	6.12585	27.2731	23.8341	22.0485	organic cation/carnitine transporter 7-like
Cg2g007540	26.5152	15.8529	17.8725	14.7138	SGF29 tudor-like domain-containing protein
Cg7g019420	28.3669	36.0897	38.4393	37.9418	pre-mRNA-processing factor 17-like isoform X1
Cg5g016980	30.272	5.56985	7.67628	3.71945	profilin-4
Cg5g005790	29.7203	19.4484	12.0153	14.6771	high-affinity nitrate transporter 3.2
Cg8g000640	32.9952	17.4696	19.3774	14.5028	glycerol-3-phosphate acyltransferase 9
Cg2g017290	26.1493	3.98474	4.70372	6.08484	Zinc transporter like
Cg9g018530	34.238	20.8002	20.8159	23.3207	protein EXECUTER 1, chloroplastic isoform X1
Cg9g007780	97.9474	20.4143	14.3929	22.2793	1-aminocyclopropane-1-carboxylate oxidase homolog 1-like
Cg5g029700	23.0979	14.1775	8.39323	10.7546	S-norcoclaurine synthase-like
Cg4g014150	8.44851	4.63699	2.85034	4.98216	E3 ubiquitin-protein ligase At4g11680 isoform X1
Cg2g031090	18.73	32.6334	30.4116	27.751	mitochondrial Rho GTPase 1 isoform X1
Cg3g024650	91.3054	14.9964	12.3918	15.4903	24-methylenesterol C-methyltransferase 2
Cg6g025450	117.034	5.29388	5.65894	9.88229	uncharacterized protein LOC18039854
Cg3g006520	19.0561	5.42405	5.63648	8.91325	trihelix transcription factor ASIL1-like
Cg1g004040	16.0173	24.7103	27.9509	22.65	F-box protein At5g49610-like
Cg7g014180	54.6655	10.0357	12.4732	16.2709	myosin-1 isoform X1
Cg4g018830	15.3599	6.12549	6.51007	8.05331	transcription factor TT2
Cg3g009210	5.37897	12.023	16.4584	10.9997	#N/A
Cg5g029530	7.54166	26.0654	28.5837	25.0696	peptidyl-tRNA hydrolase 2, mitochondrial
Cg5g032290	8.65563	16.0946	16.9508	14.8018	GPI transamidase component PIG-S
Cg9g010740	3.99939	11.8309	14.4756	8.96971	F-box protein
Cg5g001300	6.48572	12.692	7.93272	12.6189	putative E3 ubiquitin-protein ligase UBR7
Cg1g026330	27.0076	12.1516	10.8284	12.1569	probable plastid-lipid-associated protein 7, chloroplastic
Cg8g010170	66.8362	12.8084	6.88806	1.52742	phosphoenolpyruvate carboxylase kinase 1
Cg1g010850	6.56568	14.658	14.6548	11.2123	probable disease resistance protein RF9
Cg2g003370	17.9933	13.3073	7.16865	12.9689	aldehyde dehydrogenase family 3 member F1-like
Cg7g017330	30.2502	5.24321	5.05921	7.66685	OTU domain-containing protein At3g57810-like isoform X3
Cg9g002950	20.7779	6.02283	5.86662	9.90529	translocase of chloroplast 159, chloroplastic
Cg1g014190	35.3496	4.23783	2.67276	9.02933	ethylene-responsive transcription factor TINY
Cg7g007630	33.0744	9.98136	13.376	7.7092	Zinc finger, RING/FYVE/PHD-type
Cg5g025540	10.1677	21.0701	24.0261	23.5537	putative F-box protein At3g28280
Cg2g012370	491.561	15.9753	10.1589	11.9613	aquaporin TIP1-1
Cg2g039430	16.135	25.6501	29.8148	25.9993	accelerated cell death 11
Cg5g026820	21.9736	38.7795	45.7384	39.3153	signal recognition particle 14 kDa protein
Cg1g012670	64.9327	28.794	25.7645	27.4635	probable plastidic glucose transporter 2 isoform X1
Cg2g024760	7.25658	17.2382	16.6861	12.2039	disease resistance RPP13-like protein 4
Cg6g015830	89.6378	17.3235	19.4974	11.1983	zinc finger A20 and AN1 domain-containing stress-associated protein 6
Cg8g006020	52.5318	2.04083	1.72757	7.16788	long chain acyl-CoA synthetase 2
Cg8g011960	21.3114	40.1826	39.1312	40.3256	ubiquitin carboxyl-terminal hydrolase 13-like isoform X1
Cg8g020090	27.588	13.3828	14.1549	12.5036	T6D22.12 isoform 1
Cg5g027550	19.4424	28.4199	32.4938	26.4213	protein TRIGALACTOSYLDIACYLGLYCEROL 2, chloroplastic isoform X1
Cg4g003830	7.85883	19.5734	19.5858	15.7349	protein tesmin/TSO1-like CXC 5
Cg2g033690	17.4558	22.6551	20.9288	24.2672	hypothetical protein CISIN_1g002197mg
Cg1g006430	30.1537	47.4609	45.7055	48.2483	casein kinase II subunit alpha-2-like
Cg4g021070	22.8781	11.5344	10.9059	9.66704	---NA---
Cg4g020860	10.1009	26.0236	23.8331	25.6247	suppressor protein SRP40
Cg2g037500	110.876	17.099	27.5491	14.4629	potassium transporter 11 isoform X1
Cg9g006090	4.13122	17.2269	17.8084	13.2729	---NA---
Cg7g017080	19.6044	33.214	27.7174	27.9892	mitochondrial import receptor subunit TOM20
Cg8g023180	30.0688	49.677	45.6414	47.379	transcription elongation factor B polypeptide 1-like
Cg2g046940	8.44425	16.4656	16.1662	12.4618	phosphoglycolate phosphatase 2
Cg1g008860	32.485	25.6775	28.1774	24.1125	protein DYAD-like isoform X1
Cg5g017830	61.5065	9.97975	9.62024	13.8959	malonyl-CoA:anthocyanidin 5-O-glucoside-6''-O-malonyltransferase
Cg7g007090	34.7761	17.8996	18.4336	14.9262	U-box domain-containing protein 14
Cg8g020840	12.0664	24.7428	24.5643	24.2572	carbamoyl-phosphate synthase large chain, chloroplastic
Cg2g016080	83.7711	40.1699	43.0604	41.6996	outer envelope pore protein 37, chloroplastic
Cg6g020430	30.956	47.1539	41.9961	41.498	stress-response A/B barrel domain-containing protein UP3
Cg2g045070	15.3795	3.32721	2.2737	4.91628	---NA---
CgUng005850	17.1679	31.0714	31.8154	27.5315	DNA-directed RNA polymerase II subunit RPB2
Cg4g004870	43.9182	11.1779	10.3842	12.6305	methionine S-methyltransferase
Cg5g010280	32.7942	10.9341	15.2511	11.5228	Disulfide bond formation protein B 2, putative
Cg1g000520	34.3726	10.6163	8.54939	11.1533	glutamate receptor 3.6-like
Cg9g014320	7.24517	21.3659	20.0905	21.5513	uncharacterized protein LOC102620529
Cg5g015190	8.17966	18.9311	15.9907	19.0568	L-aminoadipate-semialdehyde dehydrogenase-phosphopantetheinyl transferase-like
Cg2g036460	5.04603	22.2081	22.431	17.7655	mitochondrial intermembrane space import and assembly protein 40 homolog
Cg6g013750	34.1179	18.6318	19.7897	17.692	prolycopene isomerase, chloroplastic
Cg1g017410	21.428	5.26694	5.40962	7.58717	caffeoyl-CoA O-methyltransferase
Cg2g007040	12.918	22.6573	27.7359	22.6992	zinc finger CCCH domain-containing protein 41
Cg2g007630	44.3485	13.2571	11.9392	11.5082	E3 ubiquitin-protein ligase RGLG2
Cg1g016270	202.232	22.044	16.4671	16.2232	molybdate transporter 2
Cg2g037750	7.17758	14.2104	14.2183	12.5723	Gly_transf_sug domain-containing protein/Gb3_synth domain-containing protein
Cg6g013510	6.6715	13.7544	13.2048	9.13546	EEF1A lysine methyltransferase 1
Cg2g033780	28.8947	8.4045	6.29331	7.05666	auxin efflux carrier component 3
Cg9g012510	5.43648	15.4408	16.6141	12.1413	protein SRG1
Cg2g009730	8.1677	15.0488	13.7335	14.4168	alpha-mannosidase At3g26720-like
Cg4g019820	39.8369	9.32124	8.25001	12.2563	probable anion transporter 6, chloroplastic
Cg3g014870	84.8183	10.8276	15.7384	13.7429	Leucine-rich repeat, typical subtype
Cg3g017130	21.0847	6.59295	5.8346	9.9829	probable receptor-like serine/threonine-protein kinase At5g57670 isoform X1
Cg8g010940	0.55681	16.9338	10.1365	10.0111	hypothetical protein CUMW_280900
Cg2g024030	54.2768	25.0591	20.8443	16.4685	glucose-6-phosphate/phosphate translocator 1, chloroplastic
Cg3g012740	15.106	23.4086	25.5285	20.4262	uncharacterized protein LOC102623233
Cg6g007850	30.3562	17.1164	17.7849	13.0572	DNA polymerase delta subunit 4
Cg4g011860	16.0607	22.2603	18.7431	23.8512	zinc finger protein VAR3, chloroplastic-like
Cg4g000620	40.8137	13.1408	13.061	14.6247	F-box protein AFR
Cg4g008820	25.1649	36.3169	32.6986	35.9527	Abhydrolase_5 domain-containing protein
Cg5g028480	180.361	14.0575	18.2803	9.2454	inositol transporter 1 isoform X1
Cg9g008910	38.5721	10.165	9.7004	10.4668	plastid-lipid-associated protein 6, chloroplastic
Cg5g035660	2.10682	13.703	11.5469	12.0907	antifungal protein ginkbilobin-2-like
Cg3g023750	10.835	29.5129	31.9392	30.3043	ATP synthase E chain
Cg6g015940	15.7835	6.07338	5.14702	8.68294	GDSL esterase/lipase At5g03610-like
Cg8g020300	7.26221	22.7869	19.7711	16.1693	ankyrin repeat-containing protein At5g02620
Cg1g026100	17.603	36.0666	39.7691	33.1677	50S ribosomal protein L15-like
CgUng000730	8.66327	14.2917	18.1339	13.7132	protein HAIKU1
Cg3g014030	17.5059	32.8535	32.6577	27.1003	probable ubiquitin-like-specific protease 2B isoform X1
Cg6g024530	3.73428	11.6061	11.9577	8.88794	hypothetical protein CISIN_1g0474561mg, partial
Cg5g033170	16.9473	26.0379	25.5039	21.9797	WD repeat-containing protein 70
Cg5g015980	37.6937	9.64257	11.5212	13.9176	cytochrome P450 CYP72A219-like
Cg2g020070	4.74148	13.0823	14.6669	12.5351	nuclear pore complex protein NUP133 isoform X1
Cg2g035850	27.1081	6.24639	8.06458	3.76298	DUF789 domain-containing protein
Cg9g003940	10.1887	25.2603	23.747	20.3767	putative TrmH family tRNA/rRNA methyltransferase
Cg6g024980	65.9097	11.4957	13.3801	15.145	granule-bound starch synthase 2, chloroplastic/amyloplastic
Cg5g034940	36.6693	25.5177	27.3661	28.4162	ETO1-like protein 1
Cg6g015820	21.8284	7.08244	5.05021	8.39712	purple acid phosphatase 22-like
Cg1g002130	16.7273	34.5588	34.0933	27.2511	kinectin-related protein
Cg1g003920	9.63049	32.7253	34.4489	27.7758	DNA-directed RNA polymerase III subunit RPC5
Cg9g026480	3.84382	18.6686	22.0102	14.9816	homeobox-leucine zipper protein ANTHOCYANINLESS 2
Cg7g005660	17.5941	24.3781	27.3206	23.1987	SAC3 family protein A isoform X1
Cg5g028990	26.4941	4.98502	7.00963	2.16604	UDP-glycosyltransferase 76B1-like
Cg8g003520	94.6189	2.95188	3.33923	7.78919	zinc finger protein 4-like
Cg1g014020	43.6194	14.7821	19.8694	15.8139	homeobox-leucine zipper protein ATHB-15
Cg3g024320	44.146	4.11585	2.67326	8.10587	ABC transporter B family member 13
Cg9g020320	1.4012	10.9892	8.75285	11.3308	---NA---
Cg5g005030	29.137	2.71	1.66553	6.72699	probable boron transporter 2
Cg1g017160	3.75245	15.0713	12.1861	12.4609	probable disease resistance protein At5g63020
Cg4g008110	34.7738	3.66688	3.33417	8.6014	ABC transporter G family member 32
Cg1g020450	19.1202	6.82511	6.87058	4.58108	exosome complex component RRP42
Cg8g021980	1.89263	15.0488	14.462	13.0029	UPF0481 protein At3g47200
Cg5g007470	14.2389	25.2839	26.2381	22.1711	BAX inhibitor 1
Cg6g004040	37.5367	12.3169	10.0224	9.25087	RING-H2 finger protein ATL33-like
Cg4g010400	18.2187	8.66439	8.78435	11.4161	reticulon-4-interacting protein 1 homolog, mitochondrial
Cg5g015770	78.8166	3.60381	4.54059	8.88547	solanesyl diphosphate synthase 1
Cg1g004930	17.1057	8.68014	8.3528	13.4626	beta-galactosidase 3
Cg1g029430	17.7504	41.4365	41.397	37.1548	ABC transporter D family member 1
Cg6g014680	17.3191	3.25805	2.80115	7.23875	uncharacterized protein LOC18038192
Cg9g000970	16.2788	4.50166	6.87832	7.31734	uncharacterized protein LOC18031555
Cg3g024080	17.9216	6.78522	6.76526	7.60123	Peptide chain release factor 1 like
Cg2g041380	15.6757	27.686	29.4017	22.6757	B3 domain-containing protein Os07g0563300 isoform X2
Cg1g005110	24.4723	11.2718	12.7902	11.3162	GATA transcription factor 5-like
Cg8g006980	4.22834	13.8583	13.8573	10.7632	proline-, glutamic acid- and leucine-rich protein 1 isoform X1
Cg7g010050	19.5959	26.8058	24.8617	24.7671	ubiquitin-like modifier-activating enzyme 5
Cg2g011810	9.07382	23.7391	25.1152	21.6992	ethanolamine-phosphate cytidylyltransferase
Cg5g029560	16.5569	25.7505	25.3592	22.7404	Complex 1 LYR protein
Cg5g008640	25.0007	6.32495	7.51977	8.55443	monocopper oxidase-like protein SKU5
CgUng002000	6.28092	21.084	18.9206	21.1745	single-stranded DNA-binding protein, mitochondrial
Cg1g001330	14.9631	2.76785	4.55609	5.3656	protein MID1-COMPLEMENTING ACTIVITY 1-like isoform X1
Cg1g021050	7.81173	16.4656	18.6165	14.2543	Mitochondrial glycoprotein family protein, putative
Cg5g002340	22.3806	7.70967	9.96966	7.46758	uncharacterized protein LOC18048149
Cg5g017970	6.87081	19.361	17.8267	15.7744	GDSL esterase/lipase At4g10955-like
Cg1g019940	14.9835	5.55667	7.73929	4.53173	ribonuclease 3-like protein 1
Cg7g012260	1.06266	6.76125	4.30614	7.46219	P-loop containing nucleoside triphosphate hydrolase
Cg5g027650	3.46123	23.4403	22.9881	23.2734	small ribosomal subunit protein S13, mitochondrial
Cg9g002080	31.387	12.0378	13.054	13.0916	Sn1-specific diacylglycerol lipase alpha
Cg9g018220	17.2129	31.8965	30.472	32.641	uncharacterized WD repeat-containing protein C17D11.16
Cg3g016990	8.15567	16.3664	18.2118	13.0766	Zinc ion binding, putative isoform 5
Cg5g040990	48.0838	3.08951	2.04802	7.38505	protein trichome birefringence-like 25
Cg1g007130	32.6919	18.7796	21.5583	18.7049	dentin sialophosphoprotein-like
Cg5g015670	98.5386	25.4765	32.6455	25.6649	mitogen-activated protein kinase 19
CgUng005910	2.84268	9.79115	9.90763	7.24154	putative nucleolar 27S pre-rRNA processing, Urb2/Npa2
Cg7g005490	17.6738	32.8282	33.1367	29.2445	splicing factor 3B subunit 3-like
Cg6g011620	16.1923	3.61456	2.2249	7.84865	hypothetical protein CISIN_1g004639mg
Cg4g024800	103.969	9.39991	10.5634	11.2897	peptidyl-prolyl cis-trans isomerase CYP28, chloroplastic
Cg2g028650	23.3823	6.51569	7.39607	11.4908	protein SHOOT GRAVITROPISM 5
Cg6g017270	6.85962	17.6918	18.1694	15.6709	50S ribosomal protein 5 alpha, chloroplastic
Cg3g011860	12.6364	18.8563	23.0869	18.0886	protein MON2 homolog isoform X1
Cg3g020290	29.1428	39.2034	39.6784	36.3376	protein SENSITIVE TO PROTON RHIZOTOXICITY 1
Cg5g037130	5.53052	14.9174	15.2877	10.5143	dol-P-Man:Man(5)GlcNAc(2)-PP-Dol alpha-1,3-mannosyltransferase
Cg1g004360	3.25995	17.0555	16.9176	17.3503	ATPase family AAA domain-containing protein 3
Cg2g021920	21.0982	12.2886	10.6819	9.21935	diacylglycerol kinase 5-like
Cg6g011400	27.9535	18.1727	18.7426	20.7092	chaperone protein dnaJ 72
Cg7g002750	7.60212	22.8743	22.4251	26.0138	staphylococcal-like nuclease CAN2
Cg8g020230	17.4057	9.90337	15.6181	11.3466	homeobox-leucine zipper protein REVOLUTA
Cg1g000420	29.4449	27.1874	26.0055	21.6706	AT-hook motif nuclear-localized protein 10
Cg8g021390	8.09735	16.3198	15.7607	14.4868	Nfrkb, putative isoform 1
Cg3g012970	15.2992	21.9177	22.3572	21.976	calcium-transporting ATPase 3, endoplasmic reticulum-type isoform X1
Cg2g041170	46.2836	4.74784	6.79053	2.88398	protein MOTHER of FT and TFL1-like
Cg5g021470	6.27006	15.037	16.221	13.4286	mitotic apparatus protein p62
Cg4g002930	16.3897	9.47023	12.9476	9.71864	N-alpha-acetyltransferase 50
Cg1g015170	12.304	2.78121	1.57132	8.18749	probable sulfate transporter 3.4
Cg2g039010	13.3624	7.38897	9.2158	9.58762	dihydroceramide fatty acyl 2-hydroxylase FAH1-like
Cg4g018400	47.1712	23.0049	20.945	21.5036	RING-H2 finger protein ATL38-like
Cg9g004330	37.5873	15.77	16.5056	11.8413	mitogen-activated protein kinase 15 isoform X2
Cg5g013430	5.63913	15.6449	14.565	13.6754	hypothetical protein CISIN_1g034386mg
Cg5g039260	35.8475	5.6613	11.3954	3.42473	diacylglycerol O-acyltransferase 3, cytosolic
Cg2g008270	10.5901	24.3235	19.8355	22.1441	acyl-coenzyme A oxidase 3, peroxisomal-like
Cg7g004180	22.7295	16.5969	19.3522	19.279	COP1-interacting protein 7-like
Cg5g034890	19.1917	14.1523	10.4771	16.871	protein indeterminate-domain 12
Cg3g021240	5.54243	21.0443	21.345	17.7016	protein ROOT INITIATION DEFECTIVE 3-like
Cg2g042950	25.1452	38.567	37.5062	35.2491	apoptosis inhibitor 5-like protein API5
Cg9g014890	0.658239	7.1816	4.95488	4.20645	probable leucine-rich repeat receptor-like protein kinase At1g35710
Cg2g031290	11.3608	23.2732	25.6742	20.2458	protein ALWAYS EARLY 2 isoform X1
Cg6g025330	8.01553	14.3637	15.4139	11.2389	BAG family molecular chaperone regulator 8, chloroplastic
Cg2g003490	129.219	7.6154	8.74018	6.36186	dicarboxylate transporter 1, chloroplastic
Cg8g006010	17.4204	8.59825	8.32103	5.13627	RING-H2 finger protein ATL65
Cg6g013210	11.62	34.583	30.5509	29.7353	isoamylase 1, chloroplastic-like
Cg8g002970	10.7711	24.6826	25.0488	23.7578	centrosomal protein of 128 kDa isoform X1
Cg2g008490	20.5929	11.3898	12.2428	14.1108	Ferritin-like superfamily
Cg9g019660	15.6269	27.1691	28.205	24.6365	U2 small nuclear ribonucleoprotein A'
Cg2g001660	10.7087	19.36	19.3843	20.6887	zinc finger CCCH domain-containing protein 14-like
Cg3g025640	31.2857	8.46638	7.03597	12.5326	protein PLASTID MOVEMENT IMPAIRED 1
Cg9g003020	40.0974	4.20573	5.12826	8.79936	probable protein phosphatase 2C 40
Cg2g015120	33.0055	4.45017	6.80456	7.76961	uncharacterized GPI-anchored protein At4g28100
Cg9g018250	20.9333	14.4196	16.6209	10.4471	probable inactive purple acid phosphatase 16
Cg2g039690	6.87214	14.7138	16.8675	11.422	hydroxyproline O-galactosyltransferase GALT2
Cg2g041830	16.9556	24.1805	25.1927	22.5122	trafficking protein particle complex subunit 13 isoform X1
Cg8g018540	20.8672	30.1484	28.807	26.2798	SRSF protein kinase 2
Cg2g036610	18.9494	40.4083	39.3039	37.9214	sphingoid long-chain bases kinase 1
Cg7g022840	11.6282	6.09239	4.11253	7.23686	agamous-like MADS-box protein AGL15
Cg3g018540	73.7127	10.2957	11.6595	15.2908	cellulose synthase A catalytic subunit 2 [UDP-forming]-like
Cg5g005530	26.9338	4.76871	4.57347	2.20128	Copper amine oxidase
Cg2g003580	27.4156	38.9335	37.5687	37.9672	Translocation protein Sec62
Cg7g004650	39.0665	10.5883	9.66735	13.9584	ACT domain-containing protein ACR9
Cg3g004250	6.79602	12.6685	14.9695	13.0338	probable 3-hydroxyisobutyrate dehydrogenase-like 2, mitochondrial
Cg3g010240	88.5135	3.54281	5.59387	1.08844	berberine bridge enzyme-like 8
Cg5g029540	5.68106	18.9707	20.0118	14.9451	transducin beta-like protein 3
Cg5g019780	20.5787	36.6615	36.6579	35.408	uncharacterized protein LOC102628429
Cg2g017330	16.4716	26.0368	27.2627	21.244	protein FAM133-like isoform X2
Cg6g020580	51.3014	9.07465	6.77737	5.24094	UDP-arabinopyranose mutase 1
Cg2g046060	363.81	7.01196	5.00689	6.98188	tonoplast dicarboxylate transporter
Cg9g024410	45.8865	29.5914	28.822	29.6144	dynamin-related protein 3A-like
Cg7g009620	24.8741	9.79674	8.91494	12.7693	uncharacterized protein LOC18043810
Cg7g016100	38.1574	12.5768	13.5229	14.3289	UDP-arabinopyranose mutase 3
Cg1g002720	24.7767	34.7754	31.759	29.3148	pentatricopeptide repeat-containing protein At5g39350-like
Cg2g009190	60.2696	31.3021	33.0157	32.5543	acetyl-coenzyme A synthetase, chloroplastic/glyoxysomal
Cg1g011600	17.8643	26.6648	25.605	28.1259	plant UBX domain-containing protein 7
Cg5g002480	8.5466	15.9125	13.9805	16.8092	probable E3 ubiquitin-protein ligase RHB1A isoform X1
Cg5g029210	6.57261	15.3111	12.4187	15.6951	ER lumen protein-retaining receptor-like
Cg3g021420	34.1122	18.0409	19.5029	17.7234	protein WEAK CHLOROPLAST MOVEMENT UNDER BLUE LIGHT 1-like
Cg8g005030	10.7539	3.79724	1.20634	5.45348	2-hydroxyisoflavanone dehydratase-like
Cg5g034320	16.6562	8.45609	10.4148	5.40569	F-box/kelch-repeat protein OR23
Cg2g045610	25.743	45.6535	47.6526	42.4895	plant UBX domain-containing protein 4-like
Cg5g039320	20.5024	4.19828	5.22629	7.61093	probable polygalacturonase
Cg9g003590	21.0436	8.86331	8.62446	12.2015	vesicle-associated protein 2-2 isoform X1
Cg2g008640	11.9123	5.988	6.65532	4.38763	uncharacterized protein LOC102610131
Cg5g019370	23.3079	13.3439	11.7887	16.7962	auxin-responsive protein SAUR32
Cg6g015520	8.63708	15.5932	19.1789	15.1873	glucosamine 6-phosphate N-acetyltransferase-like
Cg4g004750	38.7472	30.7191	27.7248	32.6295	UPF0587 protein C1orf123 homolog
Cg3g024560	0.743625	6.97868	5.73108	7.10895	hypothetical protein EZV62_021169
Cg9g018950	10.8324	21.8939	22.7317	21.0246	probable helicase MAGATAMA 3 isoform X1
Cg7g011060	13.0291	22.1671	23.5739	18.8276	dual specificity protein phosphatase PHS1 isoform X1
Cg5g025550	6.06663	11.5877	10.8213	12.1337	D-isomer specific 2-hydroxyacid dehydrogenase family protein isoform 2
Cg1g012620	25.4157	2.63356	1.33017	5.12951	protein NRT1/ PTR FAMILY 1.1-like
Cg1g016010	31.6145	15.8204	15.0119	17.8178	neurogenic locus notch homolog protein 3-like isoform X2
Cg3g021980	17.2189	29.7831	26.7432	22.2539	transmembrane protein 147
Cg2g035420	49.2674	4.62923	4.50484	7.83774	cytochrome P450 77A3-like
Cg1g022510	59.0051	4.80511	5.2262	5.3765	protein NUCLEAR FUSION DEFECTIVE 4
Cg5g042000	18.6077	24.7579	26.9139	27.3631	mediator of RNA polymerase II transcription subunit 12
Cg2g000200	19.0536	25.2558	25.3992	27.0191	glucosidase 2 subunit beta
Cg2g007500	16.2533	23.4664	21.2095	21.9452	cryptic loci regulator
Cg5g002090	9.86435	16.7611	12.4037	16.7717	uncharacterized protein LOC102610386 isoform X2
Cg4g004570	10.5303	22.6983	19.1584	21.8543	endoribonuclease YBEY, chloroplastic-like isoform X1
Cg9g026460	47.8833	18.1717	21.8981	15.9575	RHOMBOID-like protein 3
Cg4g021300	29.3221	4.33071	4.30188	8.14454	uncharacterized protein At4g15970 isoform X1
Cg9g005380	56.5623	6.21662	5.32988	6.48561	primary amine oxidase-like
Cg2g031220	17.3689	11.6663	15.9178	12.5839	F-box protein At1g55000
Cg7g023820	22.2694	4.70315	5.92431	6.77228	homeobox-leucine zipper protein HOX11-like
Cg5g028980	6.32657	13.2035	12.8243	7.97676	protein CMSS1
Cg2g031690	7.49395	17.1856	18.9938	14.0308	DUF538 domain-containing protein
CgUng000500	11.1758	19.7375	22.5717	16.2484	AT-hook motif nuclear-localized protein 13
Cg3g012570	32.1086	51.8872	55.3683	53.4375	hypothetical protein CISIN_1g007928mg
Cg1g003820	43.2892	20.8906	25.8417	21.8909	probable NAD(P)H dehydrogenase (quinone) FQR1-like 2
Cg5g004590	85.4727	7.57878	7.55499	11.2574	myb-like protein D
Cg6g020690	9.39952	16.6402	16.8448	16.2981	AUGMIN subunit 5
Cg3g008030	0.96071	12.1381	8.65805	7.04837	cytochrome P450 CYP82D47-like
Cg4g001160	84.2253	14.0797	15.1349	11.6472	monogalactosyldiacylglycerol synthase, chloroplastic-like isoform X2
Cg2g008170	16.1837	1.30971	1.44986	5.74517	zinc finger protein MAGPIE-like
Cg2g020030	0.333897	6.65499	7.76068	7.30133	---NA---
Cg5g001210	39.6319	26.9975	24.3376	27.8213	UDP-glucose 4-epimerase GEPI48
Cg8g024140	273.416	8.05143	9.84502	4.6582	probable pyridoxal 5'-phosphate synthase subunit PDX1
Cg8g003560	469.953	2.59086	4.49178	4.9555	uncharacterized protein LOC107178087
Cg9g008090	114.653	7.34215	3.37577	1.13878	phosphoenolpyruvate carboxylase kinase 1-like
Cg8g005950	31.3177	4.82498	8.8765	6.0084	uncharacterized protein LOC112498178
Cg1g025710	7.63904	15.6032	14.3136	15.62	probable serine/threonine-protein kinase WNK6 isoform X2
Cg5g001090	258.937	4.21529	4.02529	9.4684	glutaredoxin domain-containing cysteine-rich protein CG12206
Cg5g021580	28.6999	6.10038	4.43994	7.20909	protein WVD2-like 7 isoform X2
Cg3g012280	108.149	35.2161	34.1371	34.3717	sodium/hydrogen exchanger 2
Cg2g001330	16.2613	6.86994	6.57406	8.30475	E3 ubiquitin-protein ligase SINAT2-like
Cg4g003540	9.10646	20.7388	23.484	19.8537	beta-adaptin-like protein A
Cg5g038990	23.0048	9.20112	8.19121	12.8669	Coenzyme Q-binding protein COQ10, START domain containing protein
Cg4g008120	42.3808	5.00039	4.11635	8.30817	ABC transporter G family member 32
Cg2g011410	18.3328	33.4064	35.1811	30.1309	50S ribosomal protein L13
Cg3g025270	15.4611	8.34701	8.10278	11.0841	protein NLP4-like
Cg2g042770	22.9618	17.2491	15.3854	17.6168	transcription factor VOZ1
Cg8g024990	14.4649	3.88143	3.11402	4.41466	Capsid p24
Cg3g014180	30.1877	8.18378	6.42642	2.37304	mitochondrial uncoupling protein 5
Cg1g029000	1732.95	10.1014	15.0067	5.47288	inositol-3-phosphate synthase
Cg6g017640	3.97329	20.1722	20.607	19.9155	calmodulin-interacting protein 111 isoform X1
Cg4g004710	47.3576	26.6448	27.2706	29.1411	exosome component 10 isoform X2
Cg6g020720	61.5772	3.83672	2.81874	1.80945	vegetative cell wall protein gp1-like isoform X2
Cg5g028920	9.88869	17.9189	17.4168	15.2779	vesicle transport protein GOT1
Cg2g042940	3.58322	19.7436	20.6955	17.247	ATP synthase mitochondrial F1 complex assembly factor 1
Cg9g015330	11.5981	27.2684	27.0632	28.0172	nucleolar GTP-binding protein 1-like
Cg1g008980	24.9041	12.2513	14.0201	9.95272	target of Myb protein 1
Cg7g022460	5.35704	24.6571	26.1849	25.2085	U3 small nucleolar ribonucleoprotein protein IMP4
Cg6g006360	4.41703	14.7242	17.5299	14.9062	AT-rich interactive domain-containing protein 1-like isoform X3
Cg7g023450	41.2132	53.5221	54.7932	49.6416	DNA-directed RNA polymerases II, IV and V subunit 11
Cg6g004170	15.8398	33.6685	35.9846	31.7497	CUE domain-containing protein
Cg9g000220	8.08444	18.3819	18.8786	19.0964	probable GTP diphosphokinase CRSH, chloroplastic
Cg5g009070	21.6787	6.60474	8.79093	3.3513	hypothetical protein CUMW_074440
Cg7g013750	25.2293	14.1477	11.6302	14.2211	Ribonuclease Y
Cg2g002750	31.5781	6.08546	9.51929	5.18748	protein PYRICULARIA ORYZAE RESISTANCE 21-like
CgUng000770	36.7924	20.1195	24.3287	16.5101	transcription factor MYC2-like
Cg2g042730	18.876	6.30314	4.78546	7.0467	auxin response factor 3 isoform X2
Cg5g023960	8.3859	30.3258	28.4224	28.5896	Ribosomal protein
Cg5g034490	11.6441	17.1343	13.8537	15.5845	signal recognition particle 9 kDa protein
Cg2g015870	13.1027	25.1878	19.5138	23.3028	4-hydroxy-tetrahydrodipicolinate reductase 2, chloroplastic-like
Cg7g000420	11.5941	5.40006	4.0431	8.03876	putative lipid-transfer protein DIR1
Cg1g005830	5.13081	20.1708	21.4462	21.7916	small RNA degrading nuclease 1 isoform X1
Cg6g020140	7.59521	17.3646	16.7936	13.438	pentatricopeptide repeat-containing protein At3g02490, mitochondrial-like
Cg1g014320	42.7316	12.0386	13.9353	11.8423	auxin-responsive protein IAA27-like
Cg9g027510	8.83371	15.4657	15.531	12.9187	glutaminyl-peptide cyclotransferase-like
Cg5g015810	17.9492	5.84158	5.98973	9.21442	probable leucine-rich repeat receptor-like serine/threonine-protein kinase At3g14840
Cg9g017460	5.06935	15.6099	18.7556	12.8584	formin-like protein 18 isoform X3
Cg2g006930	11.699	5.8763	5.28003	7.44841	cysteine-rich receptor-like protein kinase 42
Cg4g015540	3.43418	9.70645	9.49867	6.23126	RING-H2 finger protein ATL7-like
Cg9g016330	149.322	8.83794	8.73711	5.41942	protein STRICTOSIDINE SYNTHASE-LIKE 2
Cg5g033480	36.8024	33.841	33.2175	25.884	heterogeneous nuclear ribonucleoprotein 1-like
Cg5g033180	21.0958	7.45647	7.74468	9.97871	tyrosine decarboxylase 1
Cg3g014360	23.7637	8.12321	5.68893	1.85709	dihydrofolate reductase
Cg5g004710	4.11813	12.3264	13.4398	11.3459	RNA-dependent RNA polymerase 2
Cg1g029690	12.2593	18.2372	19.7764	17.9696	potassium transporter 7
Cg2g043400	21.4815	13.2582	15.4727	13.329	peroxisome biogenesis protein 7
Cg2g018920	7.96204	20.6379	19.8761	16.7763	Coiled-coil domain-containing protein 21, putative isoform 2
Cg7g002170	12.1688	19.8581	20.4496	17.0464	GDP-Man:Man(3)GlcNAc(2)-PP-Dol alpha-1,2-mannosyltransferase
Cg5g004190	28.2354	32.0101	33.2366	35.6799	5-formyltetrahydrofolate cyclo-ligase, mitochondrial
Cg5g034260	8.02413	14.3613	12.5359	15.2488	deoxyhypusine hydroxylase
Cg9g003680	37.0019	29.6223	29.5428	34.662	E3 ubiquitin-protein ligase MARCH7 isoform X2
Cg5g001050	14.9761	23.3267	24.1503	21.6635	auxin response factor 9 isoform X2
Cg2g042000	14.6237	20.936	22.3687	17.8459	pentatricopeptide repeat-containing protein At4g21705, mitochondrial
Cg7g014740	24.6912	4.18826	2.83667	7.13346	lysine histidine transporter-like 6
Cg5g041090	13.9897	4.57005	3.55901	8.52121	#N/A
Cg8g001630	16.057	28.3253	24.6326	27.5989	WD-40 repeat-containing protein MSI3-like
Cg2g002800	13.7569	3.51159	5.3364	5.35352	serine/threonine-protein kinase UCNL
Cg2g015110	3.47981	11.1447	8.562	10.8245	equilibrative nucleotide transporter 3-like
Cg2g039280	64.8164	12.4837	15.9887	12.4908	nuclear transcription factor Y subunit A-7
Cg9g027970	128.157	6.08612	7.80002	6.1181	anthocyanidin 5,3-O-glucosyltransferase-like
Cg5g015590	9.55702	24.6955	24.2703	27.2761	protein SRG1
Cg9g023280	34.4923	33.0922	30.6182	34.5248	U-box domain-containing protein 35-like
Cg2g029690	14.4602	2.56735	3.33267	7.73147	cysteine-rich repeat secretory protein 12
Cg3g008910	30.129	3.23587	1.44834	5.47403	hypothetical protein CISIN_1g035250mg
Cg3g019500	13.9391	36.1666	37.0935	36.3105	TRAF3-interacting protein 1-like
Cg5g003690	21.9589	4.61708	4.72083	2.19359	protein NUCLEAR FUSION DEFECTIVE 4-like
Cg5g035980	24.5945	7.94033	9.21951	4.44861	BTB/POZ and MATH domain-containing protein 2-like
Cg7g013050	10.5498	22.8934	22.6067	18.7761	bifunctional TH2 protein, mitochondrial isoform X1
Cg3g025040	8.83188	16.1093	14.0071	10.7896	WD repeat-containing protein DWA2
Cg1g006190	71.6242	6.83613	8.04656	5.654	lysine-rich arabinogalactan protein 18
Cg8g010610	11.5014	16.2418	18.2998	15.7266	F-box protein At5g03970
Cg4g001820	17.8271	50.5217	41.8311	46.461	hydroxyproline O-arabinosyltransferase 1
Cg9g027810	8.47813	1.22586	3.16583	3.27631	probable membrane-associated kinase regulator 6
Cg6g002650	17.3521	10.8465	12.9744	12.0458	Abhydrolase_6 domain-containing protein
Cg8g008110	15.9452	22.6482	22.1335	19.9529	WD repeat-containing protein 13
Cg1g029540	33.7321	5.67079	6.69763	10.1238	BTB/POZ domain-containing protein DOT3-like
Cg4g007910	270.093	2.23418	5.07772	3.2372	hypothetical protein Ccrd_009960
Cg2g010320	715.577	82.8518	18.9691	3.02033	glycerophosphodiester phosphodiesterase GDPD1, chloroplastic-like
Cg9g014580	19.5449	5.44486	4.9327	6.33592	anthocyanidin 3-O-glucosyltransferase
Cg8g003220	6.90687	16.7665	16.392	16.6633	histone deacetylase 6
Cg1g028940	8.02688	16.9181	17.8476	14.4827	CD2 antigen cytoplasmic tail-binding protein 2 homolog
CgUng002110	23.2313	5.04003	4.71958	3.27452	putative inactive tRNA-specific adenosine deaminase-like protein 3-like isoform X1
Cg8g002960	9.87512	20.7551	21.379	18.1297	telomere repeat-binding factor 1
Cg5g005570	14.227	7.56101	7.38175	9.50654	ferric reduction oxidase 8, mitochondrial isoform X2
Cg4g009310	31.5739	3.0238	4.49967	5.28948	tetraspanin-2-like
Cg1g006180	25.6617	7.1607	5.45028	7.5671	Transducin family protein / WD-40 repeat family protein isoform 1
Cg7g019680	18.1009	33.8247	36.2489	34.2328	threonine--tRNA ligase, mitochondrial 1-like
Cg3g011800	13.7535	1.54775	2.46795	3.9142	cysteine synthase-like isoform X2
Cg1g006240	14.0303	2.87951	4.03199	6.85241	putative Late embryoproteinsis abundant protein group 8 protein
Cg5g014510	6.43709	12.7034	15.3121	11.6766	protein RBL
Cg2g036250	14.8218	26.8226	27.2326	25.2221	IST1 homolog
Cg3g016510	17.2872	2.48895	1.7091	6.31136	putative Esterase precursor
Cg5g008580	19.8066	13.5318	13.0156	16.7157	3-oxoacyl-[acyl-carrier-protein] synthase III, chloroplastic
Cg7g018850	49.3979	5.13409	6.53378	7.34594	inorganic phosphate transporter 2-1, chloroplastic
Cg5g023470	31.1865	7.50674	7.1577	9.91223	pheophytinase, chloroplastic
Cg5g024690	11.613	18.6084	18.5971	18.0805	mediator-associated protein 2-like
Cg3g008300	16.0361	3.34921	2.57123	1.74092	NAC domain-containing protein 68-like
Cg8g022570	24.3561	10.7806	14.0247	13.1462	PGR5-like protein 1B, chloroplastic
Cg5g039690	20.7466	32.4014	33.3128	30.5123	translocase of chloroplast 33, chloroplastic
Cg5g033540	11.6457	17.419	17.6082	16.6796	protein NPGR2 isoform X1
Cg1g027140	5.62425	18.2767	19.047	17.8779	RNA cytidine acetyltransferase 1 isoform X1
Cg1g026010	13.8716	7.30633	1.74006	3.34515	E3 ubiquitin-protein ligase ATL76
Cg9g027210	37.2299	5.9048	2.67385	5.60735	BAHD acyltransferase DCR
Cg1g024910	32.0258	2.18754	4.47401	1.78274	---NA---
Cg4g005790	6.06691	14.8706	15.2501	12.8653	zinc finger CCCH domain-containing protein 19-like isoform X1
Cg3g017570	10.7916	28.7376	29.008	24.1558	putative DEAD-box ATP-dependent RNA helicase 29 isoform X1
Cg5g038800	14.293	23.9885	22.9915	21.7711	SWR1-complex protein 4 isoform X1
Cg9g000450	21.0871	33.4223	32.8548	32.722	signal recognition particle 19 kDa protein-like
Cg9g027040	8.4878	12.6393	10.6297	13.9115	Ribosomal RNA small subunit methyltransferase E
Cg2g007460	1.56872	15.0333	16.583	12.2745	uncharacterized CRM domain-containing protein At3g25440, chloroplastic
Cg3g018310	11.938	25.5596	22.5012	28.4094	protein ROOT PRIMORDIUM DEFECTIVE 1
Cg2g040430	19.2279	23.929	24.5608	22.226	probable xyloglucan endotransglucosylase/hydrolase protein 8
Cg3g023830	57.462	6.88344	7.23757	6.14875	ATP sulfurylase 2-like
CgUng002120	8.28817	21.0405	20.3209	21.6591	Vesicle transport USE1
Cg1g004590	26.1922	6.27819	7.1519	7.8347	#N/A
Cg4g001110	20.3187	9.78538	11.1399	8.51255	dynamin-related protein 3A-like isoform X8
Cg5g028280	15.1904	19.7679	19.8062	20.4239	protein EFR3 homolog B isoform X1
Cg9g025330	11.8482	2.43928	1.21022	3.73731	protein ODORANT1-like
Cg6g005120	3.49198	10.9305	9.74955	9.65665	vacuolar cation/proton exchanger 3-like isoform X1
Cg7g002680	24.1509	14.1573	15.126	14.3177	Biotin_lipoyl domain-containing protein
Cg2g042430	18.3598	6.58563	8.31733	8.30162	dof zinc finger protein DOF1.4-like
Cg8g009470	17.8836	22.4241	21.6497	22.9485	cationic amino acid transporter 2, vacuolar
Cg2g039340	23.5494	39.6656	42.1006	39.2668	phenylalanine--tRNA ligase beta subunit, cytoplasmic
Cg5g018390	147.641	6.61378	5.01145	5.72979	DUF688 domain-containing protein
Cg3g018830	16.3887	28.5806	30.8489	29.1376	Uncharacterised conserved protein
Cg5g010650	6.43537	12.8909	15.1432	9.58576	formin-like protein 20
Cg4g009070	7.70739	17.5507	17.3354	15.6969	zinc finger CCCH domain-containing protein 64
Cg5g039210	24.632	4.25235	5.15399	7.52585	two-pore potassium channel 5-like
Cg1g026590	5.47035	12.0741	10.9683	8.14251	WD repeat domain-containing protein 83
Cg1g020460	19.072	11.8125	12.9435	7.34747	protein NUCLEAR FUSION DEFECTIVE 4
Cg8g013140	4.46682	9.82635	11.074	6.74878	RNA-binding protein pno1-like
Cg3g018400	30.2643	15.7379	19.6053	17.4999	UPF0496 protein 4-like
Cg1g025590	20.0475	3.04483	2.66628	5.63313	WD repeat-containing protein 44
Cg5g028410	20.3735	5.511	6.37583	7.96457	endonuclease III homolog 1, chloroplastic isoform X1
Cg4g000360	47.1927	4.34194	4.1937	7.15327	cryptochrome DASH, chloroplastic/mitochondrial
Cg1g010290	17.3494	31.7447	31.9949	27.7605	GBF-interacting protein 1-like isoform X1
Cg8g018060	29.2029	2.70989	6.43342	1.69655	stress-response A/B barrel domain-containing protein At5g22580
Cg9g026750	17.6436	1.40456	2.71733	4.56532	putative leucine-rich repeat-containing protein DDB_G0290503
Cg6g015560	18.2607	23.443	24.1439	20.3851	protein CIA1
Cg8g021710	31.6797	1.18981	1.0498	4.60848	transcription factor MYB59 isoform X2
Cg1g009370	7.36397	16.5147	17.4688	13.3929	dentin sialophosphoprotein
Cg2g044630	8.94478	35.1327	34.8292	36.377	3-oxoacyl-[acyl-carrier-protein] synthase I, chloroplastic
Cg6g014840	2.91689	12.8989	8.0598	10.5529	uncharacterized protein LOC18038475
Cg5g012920	7.33593	14.1642	10.883	12.789	alpha-ketoglutarate-dependent dioxygenase alkB homolog 6 isoform X2
Cg9g026120	26.7166	14.8368	10.5012	7.76246	Peptidoglycan-binding LysM domain-containing protein
Cg2g038270	14.8898	7.28128	7.87241	8.08501	probable potassium transporter 13
Cg9g015050	12.1613	1.04528	0.455516	5.90949	S-protein homolog 21
Cg9g025740	28.4141	13.8438	14.4802	13.2601	mitochondrial metalloendopeptidase OMA1
Cg3g025600	10.0466	23.7235	23.0324	20.485	protein MULTIPLE CHLOROPLAST DIVISION SITE 1 isoform X2
Cg2g044240	7.62521	2.79705	2.14699	3.21916	PLASMODESMATA CALLOSE-BINDING PROTEIN 3-like
Cg3g003440	5.91564	11.6433	11.3838	9.31823	beta-galactosidase 15
Cg5g040390	153.583	12.2907	17.4118	11.5166	calcium-binding protein KIC
Cg1g018570	4.25992	9.54938	8.771	10.4106	checkpoint protein hus1
Cg9g000300	38.7365	28.8641	32.2465	28.5764	novel plant SNARE 13
Cg7g007160	17.3765	29.9911	29.4247	29.1709	vacuolar protein-sorting-associated protein 33 homolog
Cg2g037470	10.1096	14.0039	17.1162	12.5665	protein CHROMATIN REMODELING 4 isoform X1
Cg5g022320	10.0314	17.5322	19.3806	16.1498	AMSH-like ubiquitin thioesterase 1
Cg5g026940	30.05	11.0529	12.1316	12.2321	probable E3 ubiquitin-protein ligase RNF217
Cg8g000200	26.6626	7.61509	7.42852	9.2918	monosaccharide-sensing protein 2-like
CgUng001380	8.22236	17.1151	16.9473	15.6501	60S ribosomal protein L18a-like protein isoform X3
Cg2g023910	25.9399	1.01656	0.980001	4.84897	early nodulin-like protein 3
Cg8g020050	11.0367	3.03998	2.95191	5.45003	protein CNGC15b
Cg9g009450	26.4261	50.5227	48.2536	49.5137	pre-mRNA-processing factor 19
Cg6g001000	6.57952	15.735	14.6812	13.9456	F-box protein At3g07870-like
Cg3g019400	20.6841	6.92571	5.56373	5.18844	Protease-associated RING/U-box zinc finger family protein
Cg2g036440	36.4733	46.5966	47.8979	41.701	phytochrome-associated serine/threonine-protein phosphatase
Cg8g009720	1.12715	8.71986	2.61612	4.34206	tryptophan synthase alpha chain-like
Cg5g019870	12.0493	19.3423	20.6866	16.956	protein PLASTID MOVEMENT IMPAIRED 1-RELATED 1
Cg5g035500	16.4971	8.44835	9.32414	11.9209	cyclin-U3-1 isoform X2
Cg3g014570	33.3502	7.42412	11.4882	5.67575	classical arabinogalactan protein 5-like
Cg9g019450	34.5059	24.4427	24.2764	19.6036	subtilisin-like protease SBT6.1 isoform X1
Cg4g009630	17.7528	30.5252	31.2442	26.709	probable ubiquitin-conjugating enzyme E2 26
Cg2g022150	33.6584	1.57231	5.4608	3.80929	calcium-binding protein PBP1-like
Cg5g012560	11.02	20.1297	18.4938	18.5811	KH domain-containing protein HEN4 isoform X2
Cg3g025110	10.9832	35.636	36.3802	34.0364	pre-rRNA-processing protein TSR1 homolog
Cg5g040010	8.59093	15.5216	15.1777	13.5531	vacuolar protein sorting-associated protein 8 homolog isoform X2
Cg2g040950	14.8685	4.32514	5.25134	8.38951	transcription factor bHLH112 isoform X2
Cg9g001340	21.1766	32.038	31.8179	31.3043	aldehyde dehydrogenase 22A1
Cg2g037510	6.39839	19.7795	18.8386	16.5454	Peroxisomal 2,4-dienoyl-CoA reductase
Cg3g006730	115.043	5.31161	8.34533	5.87621	protein LNK3
Cg5g010050	17.4849	37.4025	36.5352	35.4083	general transcription factor IIE subunit 2-like
Cg1g009800	21.0851	9.30001	8.90947	10.6117	beta-galactosidase 17 isoform X1
Cg2g034960	8.9445	14.6885	13.1434	13.876	dihydrolipoyllysine-residue acetyltransferase component 1 of pyruvate dehydrogenase complex, mitochondrial isoform X1
Cg5g035870	17.1714	23.3395	26.9255	21.4598	protein HUA2-LIKE 2-like isoform X2
Cg2g041320	81.509	18.5807	15.8636	12.7044	bifunctional riboflavin kinase/FMN phosphatase
Cg5g028200	44.8028	4.27819	7.36505	4.84687	tetrapyrrole-binding protein, chloroplastic
Cg8g014150	10.6932	20.2435	19.9722	17.6227	uncharacterized protein LOC18034344 isoform X1
Cg2g017040	4.54362	8.67018	9.5622	9.48656	hypothetical protein CUMW_234420
Cg4g012960	34.4095	4.50152	4.98246	4.95099	probable long-chain-alcohol O-fatty-acyltransferase 1
Cg9g028880	18.8628	14.1015	12.2754	15.0254	cyclin-T1-3-like isoform X1
Cg8g008960	2.29011	9.52954	10.0467	8.1509	probable disease resistance protein At4g27220
Cg1g023730	2.84662	7.55937	6.37077	6.97394	---NA---
CgUng018140	45.1097	7.4201	11.3536	5.95241	shikimate O-hydroxycinnamoyltransferase-like
Cg5g040790	11.6619	26.2547	26.6715	27.3565	beclin-1-like protein isoform X2
Cg4g001830	14.761	8.50662	11.1494	9.84845	SET domain-containing protein/PHD_2 domain-containing protein/zf-HC5HC2H_2 domain-containing protein
Cg2g040390	19.4504	4.66713	6.24263	2.94454	nuclear transport factor 2
CgUng001700	13.8354	10.3935	12.2797	9.75263	protein MIS12 homolog
Cg8g024020	165.232	2.3712	2.63555	3.44033	#N/A
Cg6g020350	29.5235	42.6639	43.6177	43.3767	ABC transporter E family member 2
Cg8g013550	10.1314	4.05324	5.09931	5.33454	small RNA-binding protein 11, chloroplastic-like
Cg1g026170	13.2786	7.17537	3.66664	7.24466	probable mannitol dehydrogenase
Cg5g031820	16.0465	3.85164	3.69597	6.54701	cation/calcium exchanger 2-like
Cg9g003240	13.967	24.0557	22.996	25.6659	protein ALWAYS EARLY 3 isoform X1
Cg5g007100	10.6154	15.3348	19.3973	14.8507	PH domain-containing protein/DUF946 domain-containing protein/DUF1162 domain-containing protein/Chorein_N domain-containing protein
Cg2g042790	6.27762	20.1385	19.2654	21.3856	uncharacterized protein LOC102627895 isoform X2
Cg5g036850	12.4684	23.0584	23.6806	23.1845	CW-type Zinc Finger, putative isoform 1
Cg5g038130	10.3303	20.0504	19.4931	19.3934	transcription initiation factor TFIID subunit 13
Cg8g018270	7.69034	3.01893	4.36927	5.80422	glucomannan 4-beta-mannosyltransferase 2
Cg2g033560	20.4533	3.55654	2.56508	5.87989	MLP-like protein 43
Cg3g015380	6.24264	1.95555	2.29456	5.64475	probable glucan 1,3-beta-glucosidase A
Cg4g014130	7.07322	20.8373	19.7627	16.6037	transmembrane protein 245-like
Cg5g000960	18.8061	6.07482	8.04619	8.7269	protein NLP7
Cg7g015140	38.7968	9.1667	10.7525	10.4172	mitochondrial protein import protein ZIM17
Cg2g020090	16.0494	4.88995	4.95532	9.74064	zinc finger CCCH domain-containing protein 18 isoform X1
Cg9g016730	25.9742	22.0639	18.7217	25.4242	RGS1-HXK1-interacting protein 1-like
Cg5g041830	17.0029	27.4819	30.9306	25.7264	ATP-dependent helicase BRM
Cg7g013270	6.9238	14.7964	14.7506	16.9104	proteinaceous RNase P 1, chloroplastic/mitochondrial
Cg5g037940	0.563619	7.65663	4.58363	4.1933	GATA transcription factor 16-like isoform X1
Cg6g015260	29.3918	5.4323	2.34586	3.27937	GATA zinc finger domain-containing protein C1393.08 isoform 1
Cg2g000800	8.51642	2.39411	2.59083	4.94785	probable polyamine transporter At3g13620
Cg9g014640	9.70042	18.1088	17.5327	14.4201	outer envelope protein 61-like
Cg1g006460	13.4373	1.58606	2.63753	3.98591	glucan endo-1,3-beta-glucosidase 12
Cg5g004550	35.4459	7.87811	9.056	9.65791	calmodulin-binding protein 60 A isoform X1
Cg9g006040	5.52179	12.2958	11.9183	10.2277	lactosylceramide 4-alpha-galactosyltransferase
Cg9g014330	4.83567	17.9079	19.4187	18.6183	protein TIC 22-like, chloroplastic
Cg7g017520	9.2214	14.3229	15.7343	15.2634	serine/arginine repetitive matrix protein 2-like isoform X1
Cg3g021440	14.5957	19.8475	19.2915	18.3217	WD repeat-containing protein ATCSA-1-like isoform X1
Cg2g000980	7.93942	15.5729	14.0983	13.5079	GPI mannosyltransferase 2
Cg1g028090	4.28363	11.8426	12.4979	12.1644	transcription termination factor MTERF5, chloroplastic isoform X1
Cg2g013300	6.86999	16.288	17.9316	14.7598	phospholipid-transporting ATPase 2 isoform X1
Cg7g005420	44.1313	7.47766	7.54962	5.11599	phosphatidylinositol n-acetylglucosaminyltransferase subunit p, putative
Cg7g011260	7.94557	17.1379	15.7861	13.7167	mitochondrial import inner membrane translocase subunit tim16-like
Cg4g003320	31.0619	5.11313	5.25217	5.58123	molybdate transporter 1
Cg8g004990	34.3025	10.0762	7.97359	12.2394	2-hydroxyisoflavanone dehydratase-like
Cg5g040670	53.0604	11.5543	10.3233	12.7121	Acid phosphatase/vanadium-dependent haloperoxidase-related protein
Cg4g006990	6.68959	23.715	22.8545	20.1826	actin-related protein 6
Cg5g010110	45.0255	8.92536	8.9648	9.98173	(+)-neomenthol dehydrogenase-like
Cg2g036590	9.21859	15.6974	17.5311	16.2829	katanin p80 WD40 repeat-containing subunit B1 homolog isoform X1
Cg2g036710	22.224	10.7211	9.95297	15.0152	2-alkenal reductase (NADP(+)-dependent)
Cg2g033100	13.8401	6.43394	5.93562	5.97107	uncharacterized protein LOC18040923
Cg1g016900	21.5142	30.1233	28.1305	27.5129	Zinc finger, RING/FYVE/PHD-type
Cg6g002850	12.2097	20.5472	18.8052	21.6883	ribosomal protein S1
Cg5g003190	4.71964	9.84931	9.15328	7.44658	microtubule-associated protein RP/EB family member 1A
Cg2g034010	22.7549	15.964	16.0478	16.1945	ELL-associated factor 1
Cg2g019510	47.7245	3.12206	2.3081	5.63868	uncharacterized protein LOC18051355
Cg2g042590	18.6721	3.49711	3.87639	5.86612	uncharacterized protein LOC18051608 isoform X2
Cg6g006890	13.0688	27.0645	31.7743	28.4669	probable envelope ADP,ATP carrier protein, chloroplastic
Cg5g026190	7.23714	13.2763	14.9446	11.8627	BAG-associated GRAM protein 1 isoform X1
Cg6g010040	13.887	1.88425	1.14263	4.27353	wound-induced protein 1
Cg4g012350	11.7745	17.1747	19.7099	17.6154	rab3 GTPase-activating protein catalytic subunit
Cg4g017580	23.2363	4.03968	3.90828	1.40438	uncharacterized protein LOC18055554
Cg2g024680	8.31532	12.2417	13.6135	11.5126	agamous-like MADS-box protein AGL82
Cg6g017700	10.769	6.9294	5.69424	8.64346	stomatal closure-related actin-binding protein 3-like
Cg5g002430	14.4871	27.3636	25.8108	23.3779	DNA repair helicase XPB1
Cg8g024100	5.30471	17.1548	17.8523	18.1426	protein ELF4-LIKE 1
CgUng003470	18.0943	9.67959	8.01101	9.50591	E3 ubiquitin-protein ligase RING1-like
Cg3g011340	4.22262	10.8489	8.77118	10.0884	zeta-carotene desaturase
Cg5g007650	7.9562	21.6815	16.1768	19.2752	ubiquitin carboxyl-terminal hydrolase 3
Cg3g019440	12.1557	15.9721	14.6804	16.4027	calcium-dependent protein kinase 11
Cg5g037330	26.2224	2.92575	4.87287	3.85434	phytochrome A-associated F-box protein
Cg5g022100	5.79608	10.488	11.6509	12.0548	L-Ala-D/L-amino acid epimerase isoform X1
Cg3g016350	21.2456	12.6686	14.3374	12.4318	DUF836 domain-containing protein
Cg9g009250	1.98081	4.98544	5.39821	5.40572	hypothetical protein CISIN_1g044810mg
Cg2g015960	4.96252	9.57293	12.6525	6.96565	---NA---
Cg3g012540	3.66863	13.0879	13.4452	10.1384	hypothetical protein CICLE_v10000711mg
Cg5g034100	3.11108	13.9626	12.1193	13.9009	protein KINESIN LIGHT CHAIN-RELATED 1
Cg3g024580	54.6383	12.6171	9.52389	7.09558	probable nucleoredoxin 2 isoform X1
Cg5g044920	11.9518	21.6085	22.768	19.8449	NADH dehydrogenase [ubiquinone] 1 alpha subcomplex assembly factor 3-like
Cg5g002350	23.9553	6.78903	5.95973	6.15096	fringe-related family protein
Cg7g015150	62.8159	3.90186	5.48446	2.0496	#N/A
Cg9g026900	8.62359	16.2491	13.6614	14.4122	DNA-directed RNA polymerase III subunit RPC3
Cg5g022060	6.40938	15.5085	16.0665	12.7421	28S ribosomal S35, mitochondrial
Cg3g014600	1.97465	8.85853	10.1809	7.63157	queuine tRNA-ribosyltransferase catalytic subunit 1-like
Cg4g004370	63.0666	4.6566	3.97977	5.34817	lachrymatory-factor synthase
Cg1g023790	1.70139	7.06729	5.9555	6.79465	#N/A
Cg2g034410	12.6702	3.25324	2.82264	6.47209	cyclin-dependent protein kinase inhibitor SMR1-like
Cg7g013680	4.9287	19.8208	19.2378	19.2231	hypothetical protein CISIN_1g008822mg
Cg8g012110	35.0168	3.01797	2.47389	2.36281	uncharacterized protein LOC102622103
[truncated: 2,429 more rows]
